# Supplementary material for: Iridium-catalyzed C–H borylation of pyridines
Source: Royal Society of Chemistry journal article supplement (doi:10.1039/c4ob01565g), 2014-08-01
Supplement: c4ob01565g1.pdf [file c4ob01565g1.pdf]

## Supporting Information

### Iridium-Catalyzed C-H Borylation of Pyridines

Scott A. Sadler,<sup>a</sup> Hazmi Tajuddin,<sup>a</sup> Ibraheem A. I. Mkhalid,<sup>a,b</sup> Andrei S. Batsanov,<sup>a</sup> David Albesa-Jove,<sup>a</sup> Man Sing Cheung,<sup>c</sup> Aoife C. Maxwell,<sup>d</sup> Lena Shukla,<sup>d</sup> Bryan Roberts,<sup>e</sup> David C. Blakemore,<sup>f</sup> Zhenyang Lin,<sup>c</sup> Todd B. Marder<sup>\*a,g</sup> and Patrick G. Steel<sup>\*a</sup>

<sup>a</sup> *Department of Chemistry, Durham University, South Road, Durham, DH1 3LE, UK; p.g.steel@durham.ac.uk*

<sup>b</sup> *Department of Chemistry, King Abdulaziz University, Jeddah 21413, Saudi Arabia*

<sup>c</sup> *Department of Chemistry, The Hong Kong University of Science and Technology, Clear Water Bay, Kowloon, Hong Kong, People's Republic of China*

<sup>d</sup> *GlaxoSmithKline R&D, Medicines Research Centre, Gunnels Wood Road, Stevenage, Hertfordshire, SG1 2NY, UK*

<sup>e</sup> *Astra Zeneca, Alderley Park, Macclesfield SK10 4TF*

<sup>f</sup> *Pfizer-Neusentis, The Portway Building, Granta Park, Cambridge, CB21 6GS, UK*

<sup>g</sup> *Institut für Anorganische Chemie, Julius-Maximilians-Universität Würzburg, Am Hubland, 97074, Würzburg, Germany; todd.marder@uni-wuerzburg.de*

## Table of Contents

|                                       |    |
|---------------------------------------|----|
| 1 General Experimental Considerations | 2  |
| 2 Experimental Details                | 5  |
| 3 NMR Spectra                         | 29 |
| 4 Single Crystal X-Ray Data           | 59 |

## Experimental

### General

All reactions were carried out under a dry nitrogen atmosphere using standard Schlenk techniques or in an Innovative Technology Inc. System 1 double-length glove box. Glassware was oven dried before all borylation reactions. Solvents used for borylation reactions were anhydrous and degassed by multiple freeze-pump-thaw cycles. Unless otherwise stated DMF and DMAc used for tandem borylation Suzuki-Miyaura reactions was used without drying but with multiple freeze-pump-thaw degassing cycles.

### Solvents

Methyl-tert-butyl-ether (MTBE) was purchased anhydrous from Sigma Aldrich. DMF and DMAc were purchased from Sigma-Aldrich. All other reaction solvents were dried using an Innovative Technology Solvent Purification System (SPS) and stored under argon. Deuterated chloroform ( $\text{CDCl}_3$ ), deuterated benzene ( $\text{C}_6\text{D}_6$ ) and deuterium oxide ( $\text{D}_2\text{O}$ ) were purchased from Apollo Scientific. The former was dried over 4 Å molecular sieves and used without further treatment. Acetone- $\text{d}_6$  was purchased from ARMAR Chemicals, dried over 4 Å molecular sieves and used without further treatment. Ether refers to diethyl ether.

### Reagents

2-Picoline, 2-phenylpyridine, 2,3-dimethylpyrazine and 2,5-dimethylpyrazine were dried over  $\text{CaH}_2$ .  $[\text{Ir}(\mu\text{-OMe})(\text{COD})]_2$  was synthesised, as previously described,<sup>1</sup> from  $\text{IrCl}_3 \cdot 3\text{H}_2\text{O}$ , obtained from Precious Metals Online.  $\text{B}_2\text{pin}_2$  was supplied as a generous gift by AllyChem Co. Ltd. (P.R.China) and was used without further purification. All other

---

<sup>1</sup> R. Uson, L. A. Oro and J.A. Cabeza, *Inorg. Synth.*, 1985, **23**, 126-130.

compounds were obtained from Sigma-Aldrich, Alfa Aesar, Fluorochem, Acros, Apollo Scientific or Lancaster and used without further purification.

### **NMR Spectroscopy**

NMR spectra were recorded at ambient temperature on Bruker Avance-400 ( $^1\text{H}$ ,  $^{11}\text{B}$ ,  $^{19}\text{F}$ ), Varian Inova-500 ( $^1\text{H}$ ,  $^{13}\text{C}\{^1\text{H}\}$ , HSQC, HMBC, COSY) or Varian VNMRs-700 ( $^1\text{H}$ ,  $^{13}\text{C}\{^1\text{H}\}$ , HSQC, HMBC, COSY) spectrometers. The  $^1\text{H}$  and  $^{13}\text{C}$  chemical shifts are reported in ppm using the residual solvent signal of the deuterated solvents ( $\text{CDCl}_3$ :  $\delta\text{H} = 7.26$  ppm,  $\delta\text{C} = 77.16$  ppm; Acetone  $\text{d}_6$ :  $\delta\text{H} = 2.05$  ppm,  $\delta\text{C} = 206.26/29.84$  ppm). All chemical shifts are reported in parts per million relative to tetramethylsilane ( $\delta\text{H} = 0.00$  ppm).  $^{11}\text{B}$  NMR chemical shifts are referenced to external  $\text{BF}_3\cdot\text{Et}_2\text{O}$  ( $\delta\text{B} = 0.0$  ppm). Multiplicities are reported using the following abbreviations; s (singlet), d (doublet), t (triplet), q (quartet), m (unresolved multiplet) and br (broad). Assignment of spectra was carried out using 2D COSY, HMBC, HSQC and NOESY techniques.

### **Elemental Analysis**

Elemental analyses were conducted in the Department of Chemistry at the University of Durham using an Exeter Analytical Inc. CE-440 Elemental Analyser.

### **Mass Spectrometry**

GC/MS analyses were performed on an Agilent 6890N gas chromatograph (column: HP-5MS, 10 m,  $\varnothing$  0.25 mm, film 0.25  $\mu\text{m}$ ; injector: 250  $^\circ\text{C}$ ; oven: 70  $^\circ\text{C}$  (2 min), 70  $^\circ\text{C}$  to 250  $^\circ\text{C}$  (20  $^\circ\text{C min}^{-1}$ ), 250  $^\circ\text{C}$  (5 min); carrier gas: helium (1.6  $\text{mL min}^{-1}$ )) equipped with an Agilent 5973 inert mass selective detector operating in EI mode and a custom built Anatune liquid handling system functioning as autosampler/injector. Electrospray (ES) mass spectra were obtained on a Micromass LCT Mass Spectrometer. High Resolution mass spectra were obtained using a Thermo Finnigan LTQFT mass spectrometer or

Xevo QToF mass spectrometer (Waters UK, Ltd) by the Durham University Mass Spectrometry Service.

### **IR Spectroscopy**

Infrared spectra were measured on a Perkin-Elmer Paragon 1000 FT-IR spectrometer *via* the use of a Diamond ATR (attenuated total reflection) accessory (Golden Gate). Assigned peaks are reported in wavenumbers ( $\text{cm}^{-1}$ ).

### **Melting Points**

Melting points were recorded using an Electrothermal 9100 capillary melting point apparatus.

### **Thin-Layer Chromatography (TLC)**

TLC was performed on 'Polygram Sil G/UV' plastic-backed silica plates with a 0.2 mm silica gel layer doped with a fluorescent indicator. Plates were purchased from VWR International.

### **Flash Column Chromatography**

Flash column chromatography refers to purification by automated operation using a Teledyne Isco CombiFlash Rf machine on pre-packed silica Redisep® Rf cartridges with the stated solvent gradient and at a constant flow rate of 35 mL/min.

### **Microwave Reactor**

Microwave reactions were carried out in septum-containing, crimp-capped, sealed vials in a monomodal Emrys™ Optimizer reactor from Personal Chemistry. The wattage was automatically adjusted to maintain the desired temperature for the desired period of time.



## **General Procedures**

### **General Procedure for the Preparation of a Catalyst Stock Solution for C-H Borylation**

In a glovebox, a catalyst stock solution was prepared by weighing  $[\text{Ir}(\text{COD})\text{OMe}]_2$  (100 mg, 0.15 mmol), dtbpy (80 mg, 0.30 mmol) and  $\text{B}_2\text{pin}_2$  (2.54 g, 10.0 mmol) into a volumetric flask followed by the addition of MTBE to make up the volume to 25 mL of solution. The flask was vigorously shaken until the solution developed a deep red colour and no more solid was visible. The solution was transferred to and stored in, a crimp-cap septum-sealed tube in a freezer and used within a week. A 2.5 mL aliquot of this equates to 1 mmol of  $\text{B}_2\text{pin}_2$  and 1.5 mol% of the active Ir catalyst

### **NMR Reaction Monitoring**

For all room temperature borylation reactions, an aliquot (0.5 mL) of the reaction mixture was removed and transferred (in a glovebox or by Schlenk techniques) to a Young's Tap-sealed NMR tube containing a coaxial tube filled with acetone- $\text{d}_6$ . The reactions were monitored for 24 h or until full consumption of starting material was observed by NMR spectroscopy.

### **Conversion Calculation**

Unless stated otherwise, conversions were calculated by NMR spectroscopic analysis by taking the ratios of integrals corresponding to products and starting materials. Where required, averages of integrals within a molecule were taken. NMR ratios are presented as a percentage.

**General Procedure A: C-H Borylation of Pyridines in a Glovebox (using pre-prepared stock solution)**

In a glovebox, a thick-walled microwave synthesis vial was charged with the corresponding pyridine (1.0 mmol) followed by the addition of 2.5 mL of stock solution. The vessel was sealed with a crimp top septum cap and shaken until all of the pyridine substrate was dissolved. The reaction mixture was stirred on a magnetic stirring block for the time stated. Upon completion, the vial was removed from the glovebox and the volatiles were removed *in vacuo* to afford the crude product. Where stated, the crude product was dry-loaded onto silica gel and purified by silica gel flash column chromatography using the stated conditions to afford the purified product.

**General Procedure B: C-H Borylation of Pyridines using Schlenk Techniques (using pre-prepared stock solution)**

A thick-walled microwave synthesis vial was charged with the corresponding pyridine (1.0 mmol). The vial was sealed with a crimp top septum cap and purged with three evacuation/refill cycles. Under argon, the vial was charged with an aliquot (2.5 mL) of stock solution and shaken until all of the pyridine dissolved. The reaction mixture was stirred on a magnetic stirring block for the time stated. Upon completion, the volatiles were removed *in vacuo* to afford the crude product. Where stated, the crude product was dry-loaded onto silica gel and purified by silica gel flash column chromatography using the stated conditions to afford the purified product.

**General Procedure C: Procedure for Catalytic Borylations (without the use of stock solution)**

In a glove box, to a premixed solution of  $[\text{Ir}(\mu\text{-OMe})\text{COD}]_2$  (X mol%) and dtbpy (X mol%) in 2 mL of solvent was added a mixture of boron reagent (Y mmol) and pyridine

derivative (Z mmol) in 3 mL of hexane (5 mL total solvent volume). The mixture was shaken vigorously to ensure complete mixing, and then the mixture was stirred at room temperature or transferred to ampoules sealed with a Teflon Young's tap and heated to 80 °C. The reactions were monitored by GC/MS.

#### **General Procedure D: One-pot C-H Borylation/Suzuki-Miyaura Cross-Coupling Sequence A**

The borylation step was carried out as per general procedure A or B. Upon completion, volatiles were removed *in vacuo*. To the crude mixture under N<sub>2</sub>, was added Pd(dppf)Cl<sub>2</sub> (5 or 10 mol%), Cs<sub>2</sub>CO<sub>3</sub> (2 eq.), CuI (1 eq.) and aryl halide (1.1 - 2 eq.) in DMF. The reaction was irradiated with stirring at 100 °C for 1 h in a microwave reactor. The reaction mixture was diluted with water and extracted into ether. The organic phase was dried over MgSO<sub>4</sub>, filtered and concentrated *in vacuo* to give the crude product. This was dry-loaded onto silica gel and purified by silica gel flash column chromatography using the stated solvent system.

#### **General Procedure E: One-pot C-H Borylation/Suzuki-Miyaura Cross-Coupling Sequence B**

Once the borylation product formed, as shown by *in situ* GC/MS analysis, the solvent was removed *in vacuo*, followed by addition of aryl halide (X mmol), K<sub>2</sub>CO<sub>3</sub> (aq.) (Y equiv., (aq. = 1 mL water : 4.5-5 mL solvent), [(PPh<sub>3</sub>)<sub>2</sub>PdCl<sub>2</sub>] (Z mmol, 5 mol%) and 1,4-dioxane (15-20 mL). The mixture was transferred to a microwave reaction tube (20 mL volume), then sealed and heated for 1 h at 150 °C.

#### **General Procedure F: "One-pot C-H borylation/Suzuki-Miyaura Cross-Coupling Sequence C using standard heating conditions**

The borylation step was carried out as per general procedure A or B. Once the borylation product formed, as shown by *in situ* NMR spectroscopic analysis, the solvent was removed *in vacuo*, followed by addition of arylhalide (1.1 eq.), Cs<sub>2</sub>CO<sub>3</sub> (2 eq.), Pd(dppf)Cl<sub>2</sub> (5 mol%) and DMF (5 mL). The mixture was heated for the stated time at 70 °C under a flow of nitrogen then worked up as per general procedure D.

#### Borylation of 2,6-Lutidine (**4**)

General procedure C was applied on a 1.9 mmol scale; [Ir( $\mu$ -OMe)COD]<sub>2</sub> (30.7 mg, 92.6 x 10<sup>-3</sup> mmol, 2.5 mol%), dtbpy (24.8 mg, 92.5 x 10<sup>-3</sup> mmol, 5 mol%), B<sub>2</sub>pin<sub>2</sub> (475 mg, 1.9 mmol, 1 equiv.) and **4** (200 mg, 1.9 mmol). After 16 h, the reaction was quenched with DMF (10 mL) and water (5 mL), extracted into ethyl acetate, and dried over (MgSO<sub>4</sub>). Kugelrohr distillation (100-170 °C, 3 x 10<sup>-4</sup> torr) gave 375 mg (1.6 mmol, 86%) of an analytically pure sample. Slow evaporation of a DCM solution, gave white crystals of **5** suitable for X-ray diffraction. m.p. 80-82 °C; Found, C 66.71; H 8.69; N 5.85; Calcd. for C<sub>13</sub>H<sub>20</sub>BNO<sub>2</sub>, C 66.98; H 8.65; N 6.01.  $\delta_H$  (CDCl<sub>3</sub>, 400 MHz) 7.31 (s, 2H; 3,5-*H*), 2.52 (s, 6H; 2,6-CH<sub>3</sub>), 1.33 (s, 12H; pin-CH<sub>3</sub>);  $\delta_C$  (CDCl<sub>3</sub>, 100 MHz) 156.50 (2C, 2,5-C), 125.09 (2C, 3,5-C), 84.03 (OCCH<sub>3</sub>), 24.50 (2,6-CH<sub>3</sub>), 23.78 (s, pin-CH<sub>3</sub>), the resonance for the carbon attached to boron was not observed;  $\delta_B$  (CDCl<sub>3</sub>, 128.4 MHz):  $\delta$  30.38 (s, br); MS (EI) m/z: 233 [M<sup>+</sup>], 218 [M-CH<sub>3</sub>]<sup>+</sup>. All spectra identical with that previously reported.<sup>2</sup>

#### Tandem Borylation Suzuki-Miyaura Reaction using 2,6-Lutidine

General procedure E was applied to **4** on a 1.87 mmol scale to synthesise 2,6-dimethyl-4-naphthalen-1-yl-pyridine (**S1**). Once compound **5** formed completely, as shown by *in situ* GC/MS analysis. The solvent was removed *in vacuo* followed by addition of 1-iodonaphthalene (474 mg, 1.87 mmol, 1 equiv.), K<sub>2</sub>CO<sub>3</sub> (aq.) (517 mg, 3.75 mmol, 2 equiv.), [(PPh<sub>3</sub>)<sub>2</sub>PdCl<sub>2</sub>] (65.5 mg, 93 x 10<sup>-3</sup> mmol, 5 mol%) and 1,4-dioxane (20 ml). The mixture was transferred to a microwave tube (20 mL volume) as above, then sealed and heated for 1 h at 150 °C. The product was extracted into ethylacetate, dried (MgSO<sub>4</sub>), and chromatographed on silica gel (hexane:ethylacetate, 90:10) to yield 400 mg (1.72

<sup>2</sup> P. Harrisson, J. Morris, T. B. Marder and P. G. Steel, *Org. Lett.*, 2009, **11**, 3586-3589.

mmol, 92%) of product. Slow evaporation of a diethylether solution gave white crystals suitable for X-ray diffraction. m.p. 90-92 °C; Found, C 87.37%, H 6.45%, N 6.14%; Calcd. for  $C_{17}H_{15}N$ , C 87.52%, H 6.48%, N 6.00%.  $\delta_H$  ( $C_6D_6$ , 500 MHz) 8.30 (d,  $J = 8$  Hz, 1H; 12), 7.39 (d,  $J = 7.8$  Hz, 1H; 6), 7.36 (d,  $J = 8$  Hz, 1H; 9), 6.97 (t,  $J = 8$  Hz, 2H; 10,11), 6.86-6.92 (m, 2H; 7, 8), 6.51 (s, 2H, 3), 2.20 (s, 6H, 2,6- $CH_3$ );  $\delta_C$  ( $C_6D_6$ , 100 MHz) 158.14, 149.20, 138.67, 131.61, 131.61, 126.86, 126.63, 126.24, 125.97, 125.50, 121.55, 24.95 ( $CH_3$ ), 24.58.  $m/z$  (EI) 233 [ $M^+$ ], 218 [ $M-CH_3$ ] $^+$ .

*Borylation of 2,6-dichloropyridine (6): Synthesis of 2,6-dichloro-4-(Bpin)-pyridine (7)*

General Procedure A was applied on a 1 mmol scale. Purification by silica flash-column chromatography eluting with 100% DCM afforded **7** as a pale pink solid (263 mg, 96%); m.p. 118 - 119 °C (from hexane); Found C 48.4%; H 5.2%; N 5.0%; Calcd. for  $C_{11}H_{14}BCl_2NO_2$  C 48.2%; H 5.15%; N 5.1%.  $\nu_{max}$  ( $CHCl_3$ ) 2984, 1515, 1422, 1358, 1337, 1161, 1141, 965, 873, 802, 674  $cm^{-1}$ .  $\delta_H$  (400 MHz,  $CDCl_3$ ) 7.59 (s, 2H, 3,5- $H$ ), 1.34 (s, 12H, pin- $CH_3$ );  $\delta_C$  (126 MHz,  $CDCl_3$ ) 150.6 (2,6-C), 128.0 (3,5-C), 85.4 (pin-C( $CH_3$ ) $_2$ ), 25.0 (pin- $CH_3$ );  $\delta_B$  (128 MHz,  $CDCl_3$ ) 29.58.  $m/z$  (GC-MS, EI) 277 (27%, [ $M^{+}(^{37}Cl^{37}Cl)$ ]), 275 (12%, [ $M^{+}(^{35}Cl^{37}Cl)$ ]), 273 (41%, [ $M^{+}(^{35}Cl^{35}Cl)$ ]), 262 (58%,  $M^{+}(^{37}Cl^{37}Cl) - CH_3$ ), 260 (24%,  $M^{+}(^{35}Cl^{37}Cl) - CH_3$ ), 258 (91%, [ $M^{+}(^{35}Cl^{35}Cl) - CH_3$ ]), 193 (10%), 191 (64%), 191 (100%). All spectra identical with that previously reported.<sup>2</sup>

*Borylation of 2-phenylpyridine (8) and Synthesis of 4-naphthalen-1-yl-2-phenyl-pyridine (S2) and 5-naphthalen-1-yl-2-phenyl-pyridine (S3)*

General Procedure E was followed using  $[Ir(\mu-OMe)COD]_2$  (22 mg,  $66 \times 10^{-3}$  mmol, 2.5 mol%), dtbpy (18 mg,  $67 \times 10^{-3}$  mmol, 5 mol%),  $B_2pin_2$  (164 mg,  $645 \times 10^{-3}$  mmol, 0.5 equiv.) and **8** (200 mg, 1.3 mmol); 1-iodonaphthalene (328 mg, 1.3 mmol, 1 equiv.),

K<sub>2</sub>CO<sub>3</sub> (aq.) (359 mg, 2.6 mmol, 2 equiv.), (PPh<sub>3</sub>)<sub>2</sub>PdCl<sub>2</sub> (45.3 mg, 65 x 10<sup>-3</sup> mmol, 5 mol%) and 1,4-dioxane (20 ml). The reaction mixture was extracted with ethylacetate, dried (MgSO<sub>4</sub>), and chromatographed on silica gel (hexane:ethylacetate, 95:5) to yield 220 mg of a mixture of the two isomers (0.783 mmol, 67%). The isolated yields of **S2** and **S3** were (100 mg, 356 x 10<sup>-3</sup> mmol, 45%), and (120 mg, 427 x 10<sup>-3</sup> mmol, 55%), respectively.

## **S2**

m.p. 80-82 °C.  $\delta_H$  (C<sub>6</sub>D<sub>6</sub>, 500 MHz) 8.67 (d, *J* = 4.9 Hz, 1H), 8.19 (2 overlapped d, *J* = 6.8 Hz, 2H), 7.76 (d, *J* = 8.3 Hz, 1H), 7.69 (s, 1H), 7.67 (d, *J* = 7.8 Hz, 1H), 7.65 (d, *J* = 8.3 Hz, 1H), 7.23-7.28 (m, 4H), 7.02-7.07 (m, 3H), 6.94 (dd, *J* = 4.9, 1.5 Hz, 1H).  $\delta_C$  NMR (C<sub>6</sub>D<sub>6</sub>, 125 MHz): 157.70, 150.09, 149.42, 139.69, 138.36, 134.26, 131.53, 129.62, 128.94, 128.91, 128.72, 127.39, 127.04, 126.87, 126.34, 125.79, 125.52, 123.57, 119.50. *m/z* (EI) 281 [M<sup>+</sup>]; Anal. Calcd. for C<sub>21</sub>H<sub>15</sub>N: C 89.65%, H 5.37%, N 4.89%; found C 89.41%, H 5.56%, N 4.98%

## **S3**

M.p. 130-132 °C.  $\delta_H$  (C<sub>6</sub>D<sub>6</sub>, 500 MHz) 8.90 (s, 1H), 8.28 (2 overlapped d, *J* = 8.3 Hz, 1H), 7.83 (d, *J* = 8.8 Hz, 1H), 7.68 (d, *J* = 7.8 Hz, 1H), 7.64 (d, *J* = 8.3 Hz, 1H), 7.40-7.45 (m, 2H), 7.32 (m, 2H), 7.17-7.28 (m, 5H).  $\delta_C$  (C<sub>6</sub>D<sub>6</sub>, 125 MHz) 156.32, 150.82, 139.56, 137.95, 136.89, 134.92, 134.40, 129.25, 129.15, 128.74, 128.57, 128.55, 127.57, 127.27, 126.71, 126.26, 125.82, 125.66, 119.46. *m/z* (EI) 281 [M<sup>+</sup>]; Anal. Calcd. for C<sub>21</sub>H<sub>15</sub>N: C 89.65%, H 5.37%, N 4.89%; found C 89.42%, H 5.52%, N 4.79%.

*Borylation-Cross-Coupling of 2-picoline (11) and Synthesis of 2-methyl-4-phenyl-pyridine (S4) and 2-methyl-5-phenyl-pyridine (S5)*

General Procedure E was followed using  $[\text{Ir}(\mu\text{-OMe})\text{COD}]_2$  (17 mg,  $51 \times 10^{-3}$  mmol, 2.5 mol%), dtbpy (14 mg,  $52 \times 10^{-3}$  mmol, 5 mol%),  $\text{B}_2\text{pin}_2$  (136 mg,  $535 \times 10^{-3}$  mmol, 0.5 equiv.) and **11** (100 mg, 1.1 mmol); 1-iodobenzene (219 mg, 1.1 mmol, 1 equiv.),  $\text{K}_2\text{CO}_3$  (aq.) (279 mg, 2.2 mmol, 2 equiv.),  $[(\text{PPh}_3)_2\text{PdCl}_2]$  (37.7 mg,  $53.7 \times 10^{-3}$  mmol, 5 mol%) and 1,4-dioxane (20 ml). The reaction mixture was extracted with ethyl acetate, dried ( $\text{MgSO}_4$ ), and chromatographed on silica gel (hexanes:diethylether, 50:50) to yield 120 mg of a mixture of the two isomers (0.71 mmol, 67%). The isolated yield for **S4** and **S5** were (120 mg, 0.71 mmol, 49%) and (123 mg, 0.72 mmol, 51%) respectively.

**S4**

M.p. 42-44 °C.  $\delta_{\text{H}}$  ( $\text{CDCl}_3$ , 500 MHz) 8.54 (d,  $J = 5.4$  Hz, 1H, 6-*H*), 7.62 (d,  $J_{\text{H,H}} = 7.7$  Hz, 2H, 2',6'-*H*), 7.41-7.48 (m, 3H, 3',4',5'-*H*), 7.37 (s, 1H, 3-*H*), 7.31 (d,  $J = 5.4$  Hz, 1H, 5-*H*), 2.63 (s, 3H,  $\text{CH}_3$ ).  $\delta_{\text{C}}$  ( $\text{CDCl}_3$ , 100 MHz) 158.45 (2-*C*), 149.12 (6'-*C*), 148.51 (4'-*C*), 138.13 (1'-*C*), 128.72, 128.61, 126.69 (2'-*C*), 120.93 (3-*C*), 118.56 (5-*C*), 24.11 ( $\text{CH}_3$ ).  $m/z$  (EI) 169  $[\text{M}^+]$ , 155  $[\text{M}-\text{CH}_4]^+$ . Anal. Calcd. for  $\text{C}_{12}\text{H}_{11}\text{N}$ : C 85.17%, H 6.55%, N 8.28%; found C 85.04%, H 6.60%, N 8.25%.

**S5**

M.p. 82-84 °C.  $\delta_{\text{H}}$  ( $\text{C}_6\text{D}_6$ , 500 MHz) 8.78 (s, 1H, 6-*H*); 7.34 (m, 2H, 2',6'-*H*), 7.29 (d,  $J = 7.7$  Hz, 1H, 4-*H*), 7.10-7.14 (m, 3H, 3', 4', 5'-*H*), 6.72 (d,  $J = 7.7$  Hz, 1H, 3-*H*), 2.47 (s, 3H,  $\text{CH}_3$ ).  $\delta_{\text{C}}$  ( $\text{C}_6\text{D}_6$ , 100 MHz) 156.47 (2'-*C*), 146.82 (6'-*C*), 137.22 (5'-*C*), 133.15, 132.43, 127.87, 126.32, 125.76 (4'-*C*), 121.56 (3'-*C*), 22.83 ( $\text{CH}_3$ ).  $m/z$  (EI) 169  $[\text{M}^+]$ ,



155 [M-CH<sub>4</sub>]<sup>+</sup>. Anal. Calcd. for C<sub>12</sub>H<sub>11</sub>N: C 85.17%, H 6.55%, N 8.28%; found C 84.89%, H 6.56%, N 8.15%.

*Borylation of 2,2'-bipyridine (14): Synthesis of 4-(Bpin)-2,2'-bipyridine (15), 5-(Bpin)-2,2'-bipyridine (16), 4,4'-bis(Bpin)-2,2'-bipyridine (S6)*

General procedure C was followed using [Ir(μ-OMe)COD]<sub>2</sub> (11 mg, 33.2 x 10<sup>-3</sup> mmol, 2.5 mol%), dtbpy (8.9 mg, 33.2 x 10<sup>-3</sup> mmol, 5 mol%), B<sub>2</sub>pin<sub>2</sub> (82 mg, 322 x 10<sup>-3</sup> mmol, 0.5 equiv.) and **14** (100 mg, 641 x 10<sup>-3</sup> mmol). The mixture was stirred at room temperature for 16 h. *In situ* GC/MS analysis showed full consumption of B<sub>2</sub>pin<sub>2</sub> and a mixture of mono and bis borylated products in a ca. 52 : 48 ratio. The mono borylated products were formed in a 42:58 ratio of **15**:**16** whilst the bis borylated derivatives were tentatively assigned as a 15 : 77 : 8 mixture of 3,3': 4,4' : 3,4' isomers respectively. Fractional Kugelrohr distillation afforded an analytically pure sample of the major 4,4'-bis(Bpin)-2,2'-bipyridine (**S6**) as confirmed by single crystal X-ray diffraction analysis. δ<sub>H</sub> (CDCl<sub>3</sub>, 500 MHz) 8.73 (d, *J* = 5.0 Hz, 2H, 3,3'-*H*), 8.70 (s, 2H, 6,6'-*H*), 7.46 (d, *J* = 5.0 Hz, 2H, 5,5'-*H*), 1.37 (s, 24H, pin-CH<sub>3</sub>). *m/z* (EI) 408 [M<sup>+</sup>], 393 [M-CH<sub>3</sub>]<sup>+</sup>. Anal. Calcd. For C<sub>22</sub>H<sub>30</sub>N<sub>2</sub>B<sub>2</sub>O<sub>4</sub>, C 64.75%, H 7.41%, N 6.86%; found C 64.64%, H 7.31%, N 6.60%.

*Borylation of 2,3-dimethylpyrazine (17): Synthesis of 2,3-dimethyl-5-(Bpin)-pyrazine (18)*

General procedure C was followed using [Ir(μ-OMe)COD]<sub>2</sub> (17 mg, 25 x 10<sup>-3</sup> mmol, 2.5 mol%), dtbpy (13 mg, 50 x 10<sup>-3</sup> mmol, 5 mol%), B<sub>2</sub>pin<sub>2</sub> (254 mg, 1 mmol, 1 equiv.) and **17** (110 μL, 108 mg, 1 mmol). After stirring at room temperature for 24 h, NMR spectroscopic analysis revealed 90% conversion to **18**. The reaction was quenched with D<sub>2</sub>O (2 drops) before being concentrated and analysed by both <sup>1</sup>H and <sup>2</sup>H NMR spectroscopy; δ<sub>D</sub> (Acetone d<sub>6</sub>, 92.1 MHz): 8.30 ppm (s, 1D).

*Borylation-Cross-Coupling of 2,3-dimethylpyrazine (17): Synthesis of 2,3-dimethyl-5-thiophen-2'-yl-pyrazine (S7)*

Following general procedure E, borylation of **17** was carried out on a 1.85 mmol scale and, following complete conversion to the boronate ester (GC/MS), the solvent was removed *in vacuo* followed by addition of 2-bromothiophene (300 mg, 1.84 mmol, 1 equiv.),  $K_3PO_4$  (aq.) (785 mg, 3.70 mmol, 2 equiv.),  $[(PPh_3)_2PdCl_2]$  (65 mg,  $93 \times 10^{-3}$  mmol, 5 mol%) and DMF (20 ml). The reaction mixture was transferred to a microwave tube (20 mL volume), crimp sealed with a septum cap, and heated for 1 h at 150 °C. The product was extracted into ethylacetate, dried ( $MgSO_4$ ), and concentrated. Chromatography on silica gel (hexane:ethylacetate, 9:1) afforded **S7** (120 mg, 0.632 mmol, 34%). M.p. 50-52 °C.  $\delta_H$  ( $CDCl_3$ , 400 MHz) 8.62 (s, 1H, 6-*H*), 7.59 (dd,  $J = 4.0$ , 1.0 Hz, 1H, 5'-*H*), 7.39 (dd,  $J = 5.1$ , 1.0 Hz, 1H, 3'-*H*), 7.10 (dd,  $J = 4.0$ , 5.1 Hz, 1H, 4'-*H*), 2.52, 2.54 (6H, s, 2,3- $CH_3$ );  $\delta_C$  NMR ( $CDCl_3$ , 100 MHz) 151.67, 150.15, 145.0, 141.82, 136.6, 128.15, 127.61, 124.63, 21.98, 21.59.  $m/z$  (EI) 190  $[M^+]$ , 108  $[M-C_4H_2S]^+$ . Anal. Calcd. For  $C_{10}H_{10}N_2S$ , C 63.13%, H 5.30%, N 14.72%; found C, 63.18%, H, 5.34%, N, 14.50%.

*Borylation of 2-chloro-3-methylpyrazine (19); Synthesis of 2-chloro-3-methyl-6-(Bpin)pyrazine (20) and 2-chloro-3-methyl-5-(Bpin)-pyrazine (21)*

General procedure C was followed using  $[Ir(\mu-OMe)COD]_2$  (15 mg,  $23 \times 10^{-3}$  mmol, 2.5 mol%), dtbpy (13 mg,  $47 \times 10^{-3}$  mmol, 5 mol%),  $B_2pin_2$  (236 mg, 0.9 mmol, 1 equiv.) and **19** (120 mg, 0.9 mmol). The reaction was stirred at room temperature for 24 h. NMR spectroscopic analysis of the crude mixture showed 30% conversion (based on **19**) to a 64:36 mixture of **20:21**.

*Borylation of 2,5-dimethylpyrazine (22): Synthesis of 2,5-dimethyl-3-(4-methoxyphenyl)pyrazine (S8)*

General procedure C was followed using  $[\text{Ir}(\mu\text{-OMe})\text{COD}]_2$  (33 mg,  $5 \times 10^{-2}$  mmol, 5 mol%), dtbpy (27 mg, 0.1 mmol, 10 mol%),  $\text{B}_2\text{pin}_2$  (254 mg, 1 mmol, 1 equiv.) and **22** (110  $\mu\text{L}$ , 108 mg, 1 mmol). The reaction was stirred at 80 °C for 16 h. NMR spectroscopic analysis of the crude mixture showed 56% conversion (based on **22**).

$\text{Pd}(\text{dppf})\text{Cl}_2$  (37 mg,  $5 \times 10^{-2}$  mmol, 5 mol%),  $\text{K}_3\text{PO}_4$  (420 mg, 2 mmol, 2 equiv.), 4-iodoanisole (260 mg, 1.1 mmol, 1.1 equiv.) and DMAc:H<sub>2</sub>O (9:1) (5 mL) were added to the crude mixture and heated to 60 °C for 16 h. The reaction was worked up as per General Procedure D/F. Flash column chromatography (gradient elution 10-25% Ethyl Acetate in Heptane) provided **S8** as a pale yellow oil (59 mg, 28% based on **22**).

**S8**

$^1\text{H}$  NMR (600 MHz,  $\text{CDCl}_3$ )  $\delta$  8.28 (s, 1H, 6-*H*), 7.52 (m, 2H, 2'/6'-*H*), 7.00 (m, 2H, 3'/5'-*H*), 3.86 (s, 3H, O- $\text{CH}_3$ ), 2.58 (s, 3H,  $\text{CH}_3$ ), 2.56 (s, 3H,  $\text{CH}_3$ );  $^{13}\text{C}$  NMR (151 MHz,  $\text{CDCl}_3$ )  $\delta$  160.1 (C-O $\text{CH}_3$ ), 152.6 (3-C), 150.4 (ArC), 148.2 (ArC), 141.5 (6-C), 131.5 (1'-C), 130.5 (2C, 2'/6'-C), 114.0 (2C, 3'/5'-C), 55.5 (O $\text{CH}_3$ ), 22.9 (2-C $\text{CH}_3$ ), 21.3 (5-C $\text{CH}_3$ );  $\nu_{\text{max}}$  (neat) 1610, 1513, 1448, 1407, 1372, 1290, 1249, 1176, 1161, 1068, 1033, 968, 908  $\text{cm}^{-1}$ ; Accurate Mass (ASAP)  $m/z$  found  $[\text{M}+\text{H}]^+$  215.1184 ( $\text{C}_{13}\text{H}_{15}\text{N}_2\text{O}$ ) requires  $M$  215.1183.

*Borylation of 2-phenylpyrimidine (24): Synthesis of 2-phenyl-4-pyridin-3'-yl-pyrimidine (S9)*

General procedure C was followed using  $[\text{Ir}(\mu\text{-OMe})\text{COD}]_2$  (20 mg,  $3 \times 10^{-2}$  mmol, 5 mol%), dtbpy (16 mg, 0.1 mmol, 10 mol%),  $\text{B}_2\text{pin}_2$  (150 mg, 1 mmol, 1 equiv.) and **24**

(100 mg, 0.6 mmol). The reaction was stirred at RT for 24 h. NMR spectroscopic analysis of the crude mixture showed 65% conversion to **25**.

Pd(Amphos)Cl<sub>2</sub> (35 mg, 5 x 10<sup>-2</sup> mmol, 5 mol%), K<sub>3</sub>PO<sub>4</sub> (420 mg, 2 mmol, 2 equiv.), 3-iodopyridine (230 mg, 1.1 mmol, 1.1 equiv.) and DMAc:H<sub>2</sub>O (9:1) (5 mL) were added to the crude mixture and heated to 70 °C for 2 h. The reaction was worked up as per General Procedure D/F. Flash column chromatography Heptane:Ethyl Acetate (1:1) provided **S9** as an orange solid (110 mg, 47% based on **24**).

#### **S9**

<sup>1</sup>H NMR (700 MHz, CDCl<sub>3</sub>) δ 9.03 (s, 2H, 4/6-*H*), 8.92 (s, 2''-*H*), 8.72 (d, J = 4.6 Hz, 1H, 6''-*H*), 8.50 (m, 2H, 2', 6'-*H*), 7.95 (d, J = 7.8 Hz, 1H, 4''-*H*), 7.53 (m, 3H, 3', 5', 4'-*H*), 7.48 (dd, J = 7.8, 4.6 Hz, 1H, 5''-*H*); <sup>13</sup>C NMR (176 MHz, CDCl<sub>3</sub>) δ 164.4 (2-*C*), 155.4 (2*C*, 4, 6-*C*), 150.0 (6''-*C*), 147.9 (2''-*C*), 137.1 (1'-*C*), 134.3 (4''-*C*), 131.2 (4'-*C*), 130-7 (5-*C*), 128.9 (3*C*, 3', 5', 3''-*C*), 128.4 (2*C*, 2', 6'-*C*), 124.2 (5''-*C*); ν<sub>max</sub> (neat) 1534, 1442, 1425, 1374, 1334 cm<sup>-1</sup>; Accurate Mass (ASAP) m/z found [M]<sup>+</sup> 233.0953 (C<sub>15</sub>H<sub>11</sub>N<sub>3</sub>) requires *M* 233.0954.

#### *Borylation of 3-methylpyridazine (26): Synthesis of 3-methyl-5-naphthalen-2-ylpyridazine (S10)*

General procedure B was applied to 3-Methylpyridazine (**26**) on a 1 mmol scale. The reaction was stirred at RT for 24 h. NMR spectroscopic analysis showed full conversion to **27**. Pd(Amphos)Cl<sub>2</sub> (35 mg, 5 x 10<sup>-2</sup> mmol, 5 mol%), K<sub>3</sub>PO<sub>4</sub> (420 mg, 2 mmol, 2 equiv.), 2-bromonaphthalene (230 mg, 1.1 mmol, 1.1 equiv.) and DMAc:H<sub>2</sub>O (9:1) (5 mL) were added to the crude mixture and heated to 70 °C for 2 h. The reaction was worked up as per General Procedure D/F. Flash column chromatography Heptane:Ethyl Acetate (4:6) provided **S10** as an orange solid (96 mg, 44% based on **26**).

#### **S10**

$^1\text{H}$  NMR (700 MHz,  $\text{CDCl}_3$ )  $\delta$  9.43 (d,  $J$  = 2.0 Hz, 1H, 6-*H*), 8.16 (s, 1H, 1'-*H*), 8.00 (d,  $J$  = 8.5 Hz, 1H, 4'-*H*), 7.93 (m, 2H, 5', 8'-*H*), 7.75 (dd,  $J$  = 8.5, 1.7 Hz, 1H, 3'-*H*), 7.63 (d,  $J$  = 2.0 Hz, 1H, 4-*H*), 7.58 (m, 2H, 6', 7'-*H*) 2.83 (s, 3H,  $\text{CH}_3$ );  $^{13}\text{C}$  NMR (176 MHz,  $\text{CDCl}_3$ )  $\delta$  160.0 (3-C), 148.0 (6-C), 138.5 (5-C), 133.7 (10'-C), 133.4 (9'-C), 132.0 (2'-C), 129.4 (4'-C), 128.5 (ArC), 127.8 (ArC), 127.4 (ArC), 127.0 (ArC), 126.9 (1'-C), 124.0 (3'-C), 123.8 (4-C), 22.4 ( $\text{CH}_3$ );  $\nu_{\text{max}}$  (neat)  $1590\text{ cm}^{-1}$ ; Accurate Mass (ASAP)  $m/z$  found  $[\text{M}]^+$  220.1000 ( $\text{C}_{15}\text{H}_{12}\text{N}_2$ ) requires  $M$  220.0999.

### Borylation of 2-chloropyridine (**32a**)

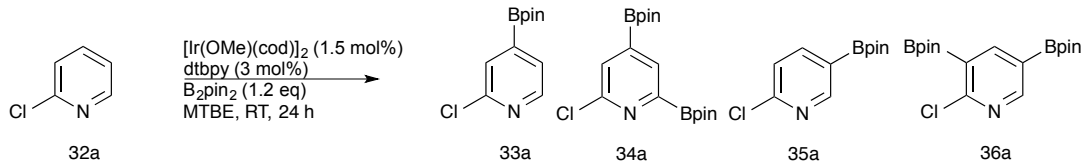

General procedure A was applied to 2-chloropyridine (**32a**) on a 1 mmol scale with additional  $\text{B}_2\text{pin}_2$  (51 mg, 0.2 mmol). The reaction mixture was stirred at room temperature for 24 h giving full conversion ( $^1\text{H}$  NMR) to **33a**, **34a**, **35a** and **36a** in a 28:38:27:7 ratio.

### Borylation of 2-chloropyridine (**32a**) under boron-limiting conditions

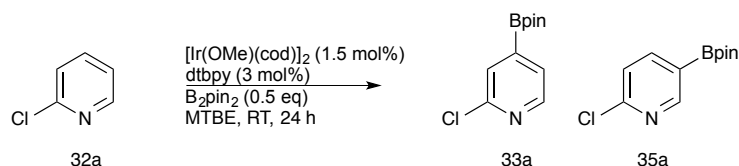

General procedure B was applied to 2-chloropyridine (**32a**) on a 1 mmol scale. The reaction mixture was stirred at room temperature for 24h giving 55% conversion ( $^1\text{H}$  NMR) to afford **33a** and **35a** in a 75:25 ratio.

### Borylation of 2-methoxypyridine (**32b**)

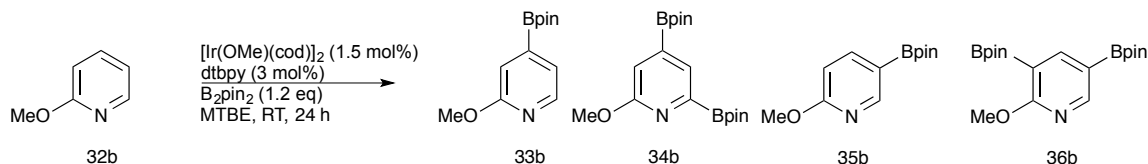

General procedure A was applied to 2-methoxypyridine (**32b**) on a 1 mmol scale with additional  $\text{B}_2\text{pin}_2$  (51 mg, 0.2 mmol). The reaction mixture was stirred at room temperature for 24 h giving full conversion ( $^1\text{H}$  NMR) to **33b**, **34b**, **35b** and **36b** in a 43:17:31:9 ratio.

*Borylation of 2-methoxypyridine (32b) under boron-limiting conditions*

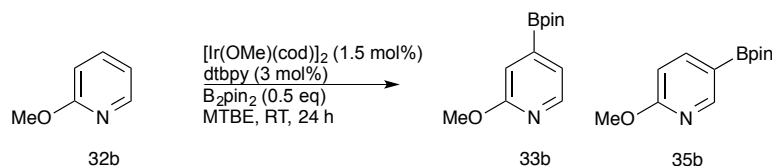

General procedure B was applied to 2-methoxypyridine (**32b**) on a 1 mmol scale. The reaction mixture was stirred at room temperature for 24 h giving 42% conversion ( $^1\text{H}$  NMR) to afford **33b** and **35b** in a 73:27 ratio.

*Borylation of 2-(trifluoromethyl)pyridine (32c)*

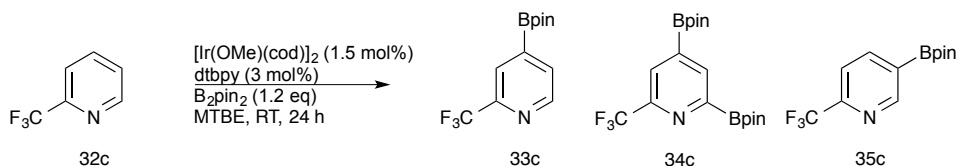

General procedure A was applied to 2-(trifluoromethyl)pyridine (**32c**) on a 1 mmol scale with additional  $\text{B}_2\text{pin}_2$  (51 mg, 0.2 mmol). The reaction mixture was stirred at room temperature for 24 h giving full conversion ( $^1\text{H}$  NMR) to **33c**, **34c** and **35c** in a 25:36:39 ratio.

*Borylation of 2-(trifluoromethyl)pyridine (32c) under boron-limiting conditions*

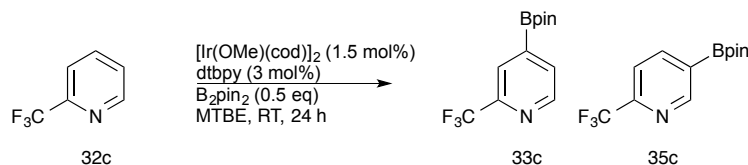

General procedure B was applied to 2-(trifluoromethyl)pyridine (**32c**) on a 1 mmol scale. The reaction mixture was stirred at room temperature for 24 h giving 83% conversion ( $^1\text{H}$  NMR) to afford **33c** and **35c** in a 65:35 ratio.

### Borylation of 2-fluoropyridine (**32d**)

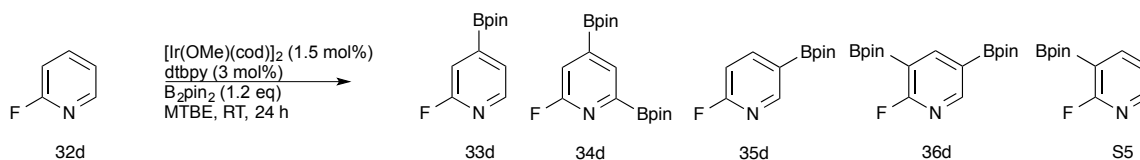

General procedure A was applied to 2-fluoropyridine (**32d**) on a 1 mmol scale with additional  $\text{B}_2\text{pin}_2$  (51 mg, 0.2 mmol). The reaction mixture was stirred at room temperature for 24 h giving full conversion ( $^1\text{H}$  NMR) to afford **33d**, **34d**, **35d**, **36d** and **S11** in a 45:15:10:19:11 ratio.

### Borylation of 2-fluoropyridine (**32d**) under boron-limiting conditions

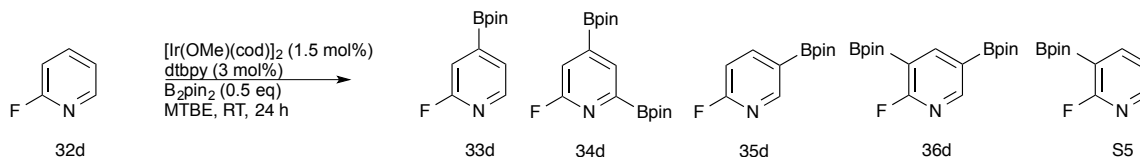

General procedure B was applied to 2-fluoropyridine (**32d**) on a 1 mmol scale. The reaction mixture was stirred at room temperature for 24 h giving 89% conversion ( $^1\text{H}$  NMR) to afford **33d**, **34d**, **35d**, **36d** and **S11** in a 57:2:19:5:17 ratio.

### Borylation of methyl-2-chloronicotinate (**37a**); synthesis of methyl-2-chloro-5-(Bpin)-nicotinate (**39a**)

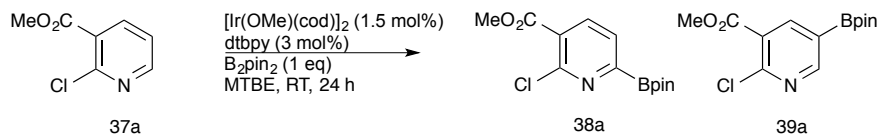

General procedure B was applied to methyl-2-chloronicotinate (**37a**) on a 1 mmol scale. The reaction mixture was stirred at room temperature for 24 h giving 75% conversion ( $^1\text{H}$  NMR) to afford **38a** and **39a** in a 6:94 ratio. The crude mixture was dry loaded onto  $\text{C}_{18}$  silica and purified by reverse phase column chromatography (0-100% MeCN in  $\text{H}_2\text{O}$ ) using a Biotage SNAP KP- $\text{C}_{18}$ -HS cartridge. Fractions with the same  $R_f$  were combined,



concentrated and the aqueous residue extracted with ethyl acetate. Concentration of the solvent gave **39a** as a white solid (0.93 g, 52%).

### 39a

$^1\text{H}$  NMR (400 MHz,  $\text{CDCl}_3$ )  $\delta$  8.80 (m, br, 6-*H*), 8.49 (d,  $J = 1.9$  Hz, 1H, 4-*H*), 3.95 (s, 3H,  $\text{CO}_2\text{CH}_3$ ), 1.36 (s, 12H, pin- $\text{CH}_3$ );  $^{13}\text{C}$  NMR (101 MHz,  $\text{CDCl}_3$ )  $\delta$  165.1 ( $\text{CO}_2\text{CH}_3$ ), 157.4 (6-*C*), 152.6 (2-*C*), 146.3 (4-*C*), 126.2 (3-*C*), 84.8 (2C, pin- $\text{C}(\text{CH}_3)_2$ ), 52.8 ( $\text{CO}_2\text{CH}_3$ ), 24.9 (4C, pin- $\text{CH}_3$ );  $^{11}\text{B}$  NMR (128 MHz,  $\text{CDCl}_3$ )  $\delta$  30.2;  $\nu_{\text{max}}$  (neat) 1738, 1694, 1588, 1548, 1426, 1359, 1255, 1138, 1108, 1062, 971  $\text{cm}^{-1}$ ; Accurate Mass ( $\text{AP}^+$ -TOF)  $m/z$  found  $[\text{M}]^+ 297.1047$  ( $\text{C}_{13}\text{H}_{18}^{10}\text{B}^{35}\text{ClNO}_4$ ) requires  $M 297.1054$ .

### Borylation of methyl-2-methoxynicotinate (**37b**): Synthesis of methyl-2-methoxy-5-(4-methoxyphenyl)nicotinate (**S12**)

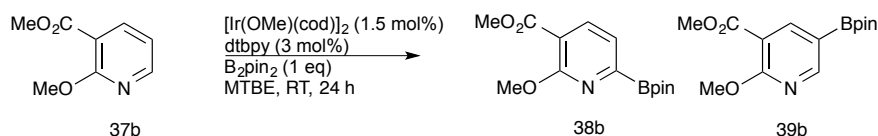

General procedure F was applied to Methyl-2-methoxynicotinate (**37b**) on a 1.1 mmol scale;  $\text{Pd}(\text{dppf})\text{Cl}_2$  (0.04g, 0.05 mmol, 5 mol%),  $\text{Cs}_2\text{CO}_3$  (0.72 g, 2.2 mmol) and 4-iodoanisole (0.28 g, 1.2 mmol). The reaction mixture was stirred at room temperature for 24 h giving full conversion ( $^1\text{H}$  NMR) to **38b** and **39b** in a 7:93 ratio. Suzuki-Miyaura step was carried out for 2 h. Crude material was purified by flash column chromatography (0-15% EtOAc in Heptane) to give **S12** as a white solid (0.22 g, 76%).

## S12

$^1\text{H}$  NMR (700 MHz,  $\text{CDCl}_3$ )  $\delta$  8.48 (d,  $J$  = 2.6 Hz, 1H, 6-*H*), 8.33 (d,  $J$  = 2.6 Hz, 1H, 4-*H*), 7.47 (m, 2H, 2', 6'-*H*), 6.99 (m, 2H, 3', 5'-*H*), 4.08 (s, 3H, 2- $\text{COCH}_3$ ), 3.93 (s, 3H,  $\text{CO}_2\text{CH}_3$ ), 3.85 (s, 3H, 4'- $\text{COCH}_3$ );  $^{13}\text{C}$  NMR (176 MHz,  $\text{CDCl}_3$ )  $\delta$  165.7 ( $\text{CO}_2\text{CH}_3$ ), 161.5 (2-*C*), 159.6 (4'-*C*), 148.4 (6-*C*), 139.6 (4-*C*), 129.8 (5-*C*), 129.4 (1'-*C*), 127.9 (2C, 2', 6'-*C*), 114.7 (2C, 3', 5'-*C*), 113.7 (3-*C*), 55.5 (4'- $\text{COCH}_3$ ), 54.4 (2- $\text{COCH}_3$ ), 52.5 ( $\text{CO}_2\text{CH}_3$ );  $\nu_{\text{max}}$  (neat) 1732, 1606, 1563, 1519, 1474, 1417, 1327, 1285, 1245, 1181, 1087, 1060, 1014  $\text{cm}^{-1}$ ; Accurate Mass (ASAP)  $m/z$  found  $[\text{M}+\text{H}]^+$  274.1079 ( $\text{C}_{15}\text{H}_{16}\text{NO}_4$ ) requires  $M$  274.1075.

*Borylation of methyl-2-(trifluoromethyl)nicotinate (37c): Synthesis of methyl-2-(trifluoromethyl)-5-(4-methoxyphenyl)nicotinate (S13)*

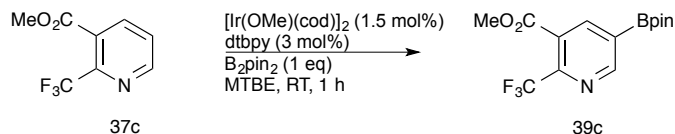

General procedure F was applied to Methyl-2-(trifluoromethyl)nicotinate (**37c**) on a 1.4 mmol scale;  $\text{Pd}(\text{dppf})\text{Cl}_2$  (0.05 g, 0.07 mmol),  $\text{Cs}_2\text{CO}_3$  (0.91 g, 2.8 mmol) and 4-iodoanisole (0.36 g, 1.5 mmol). The reaction mixture was stirred at room temperature for 1h giving full conversion ( $^1\text{H}$  NMR) to **39c**. Suzuki-Miyaura step carried out for 3 h. Purification by preparative HPLC provided **S13** as a white solid (0.33 g, 75%).

## S13

$^1\text{H}$  NMR (700 MHz,  $\text{CDCl}_3$ )  $\delta$  8.96 (d,  $J$  = 2.1 Hz, 1H, 6-*H*), 8.22 (d,  $J$  = 2.1 Hz, 1H, 4-*H*), 7.58 (m, 2H, 2', 6'-*H*), 7.05 (m, 2H, 3', 5'-*H*), 3.99 (s, 3H,  $\text{CO}_2\text{CH}_3$ ), 3.88 (s, 3H,  $\text{COCH}_3$ );  $^{13}\text{C}$  NMR (176 MHz,  $\text{CDCl}_3$ )  $\delta$  166.2 ( $\text{CO}_2\text{CH}_3$ ), 161.0 (4'-*C*), 148.6 (6-*C*), 143.4 (m, 2-*C*), 138.9 (5-*C*), 135.7 (4-*C*), 128.7 (2C, 2', 6'-*C*), 127.8 (3-*C*), 127.6 (1'-*C*), 121.4 (q,  $J$  =

274.6, CF<sub>3</sub>), 115.1 (2C, 3', 5'-C), 55.6 (COCH<sub>3</sub>), 53.4 (CO<sub>2</sub>CH<sub>3</sub>); <sup>19</sup>F NMR (376 MHz, CDCl<sub>3</sub>) δ -64.3 (s); ν<sub>max</sub> (neat) 1738, 1609, 1519, 1440, 1324, 1252, 1142, 1065, 1049 cm<sup>-1</sup>; Accurate Mass (ASAP) m/z found [M]<sup>+</sup> 311.0769 (C<sub>15</sub>H<sub>12</sub>F<sub>3</sub>NO<sub>3</sub>) requires *M* 311.0768.

*Borylation of methyl 2-fluoronicotinate (37d): Synthesis of methyl-2-fluoro-5-(3-methoxyphenyl)nicotinate (S14)*

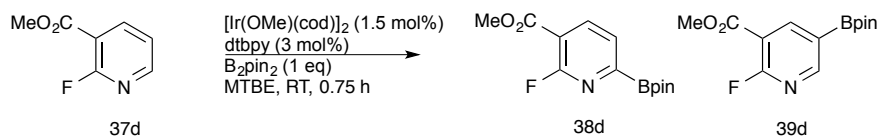

General procedure F was applied to Methyl-2-fluoronicotinate (**37d**) on a 4.4 mmol scale; Pd(dppf)Cl<sub>2</sub> (0.16 g, 0.22 mmol), Cs<sub>2</sub>CO<sub>3</sub> (2.87 g, 8.8 mmol) and 3-iodoanisole (1.13 g, 4.8 mmol). The reaction mixture was stirred at room temperature for 45 min giving full conversion (<sup>1</sup>H NMR) to **38d** and **39d** in a 9:91 ratio. The Suzuki-Miyaura step was carried out for 2 h. Crude material was purified by flash column chromatography (0-20% EtOAc in Heptane) to give **S14** as an off-white solid (0.71 g, 62%).

#### **S14**

<sup>1</sup>H NMR (700 MHz, CDCl<sub>3</sub>) δ 8.54 (m, 2H, 4, 6-*H*), 7.40 (t, *J* = 7.9 Hz, 1H, 5'-*H*), 7.13 (d, *J* = 7.9 Hz, 1H, 6'-*H*), 7.07 (t, *J* = 2.3 Hz, 1H, 2'-*H*), 6.97 (dd, *J* = 7.9, 2.3 Hz, 1H, 4'-*H*), 3.98 (s, 3H, CO<sub>2</sub>CH<sub>3</sub>), 3.87 (COCH<sub>3</sub>); <sup>13</sup>C NMR (176 MHz, CDCl<sub>3</sub>) δ 163.8 (d, *J* = 8.1 Hz, CO<sub>2</sub>CH<sub>3</sub>), 161.0 (d, *J* = 249.8 Hz, 2-C), 160.4 (3'-C), 149.6 (d, *J* = 15.6 Hz, ArC), 141.7 (d, *J* = 1.7 Hz, ArC), 137.0 (1'-C), 135.2 (d, *J* = 5.3 Hz, 5-C), 130.5 (5'-C), 119.5 (6'-C), 114.0 (4'-C), 113.4 (d, *J* = 26 Hz, 3-C), 113.0 (2'-C), 55.5 (COCH<sub>3</sub>), 53.0 (CO<sub>2</sub>CH<sub>3</sub>); <sup>19</sup>F

NMR (376 MHz, CDCl<sub>3</sub>)  $\delta$  -65.2 (m);  $\nu_{\text{max}}$  (neat) 1722, 1603, 1459, 1446, 1327, 1292, 1249, 1179, 1089, 1042, 977 cm<sup>-1</sup>; Accurate Mass (ASAP)  $m/z$  found [M]<sup>+</sup> 261.0801 (C<sub>14</sub>H<sub>12</sub>FNO<sub>3</sub>) requires  $M$  261.0824

**Borylation of 2,3-dichloropyridine (37e): Synthesis of 2,3-dichloro-5(Bpin)-pyridine (39e)**

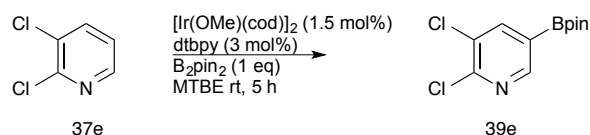

General procedure B was applied to 2,3-dichloropyridine (**37e**) on a 1 mmol scale. The reaction mixture was stirred at room temperature for 5 h giving full conversion (<sup>1</sup>H NMR) to **39e**. The crude product was filtered through an SCX column before being purified by flash column chromatography (eluent; 0-5% MeOH in DCM) to give **39e** (0.12 g, 44%) as a white solid.  $\delta_{\text{H}}$  (700 MHz, CDCl<sub>3</sub>) 8.57 (1H, d,  $J$  = 1.5 Hz, 6-*H*), 8.09 (1H, d,  $J$  = 1.5 Hz, 4-*H*), 1.33 (12H, s, CH<sub>3</sub>);  $\delta_{\text{C}}$  (176 MHz, CDCl<sub>3</sub>) 152.9 (6-C), 151.8 (2-C), 144.6 (4-C), 130.5 (3-C), 84.9 (pin-C(CH<sub>3</sub>)<sub>2</sub>), 25.0 (pin-CH<sub>3</sub>);  $\delta_{\text{B}}$  (128 MHz, CDCl<sub>3</sub>) 30.0 (s, br).  $m/z$  (GCMS-EI) 277 ([M(<sup>37</sup>Cl<sub>2</sub>)]<sup>+</sup>), 275 ([M(<sup>37</sup>Cl<sup>35</sup>Cl)]<sup>+</sup>), 273 ([M(<sup>35</sup>Cl<sub>2</sub>)]<sup>+</sup>), 262 ([M(<sup>37</sup>Cl<sub>2</sub>)-CH<sub>3</sub>]<sup>+</sup>), 260 ([M(<sup>37</sup>Cl<sup>35</sup>Cl)-CH<sub>3</sub>]<sup>+</sup>), 258 ([M(<sup>35</sup>Cl<sub>2</sub>)-CH<sub>3</sub>]<sup>+</sup>). HRMS (ASAP) found [M+H]<sup>+</sup> 273.0609, C<sub>11</sub>H<sub>15</sub><sup>10</sup>BN<sub>2</sub><sup>35</sup>Cl<sub>2</sub> requires  $M$  273.0625.

**Borylation-cross-coupling of 2,4-dichloropyridine (40a): Synthesis of 2,4-dichloro-6-phenylpyridine (S15) and 2,4-dichloro-5-phenylpyridine (S16)**

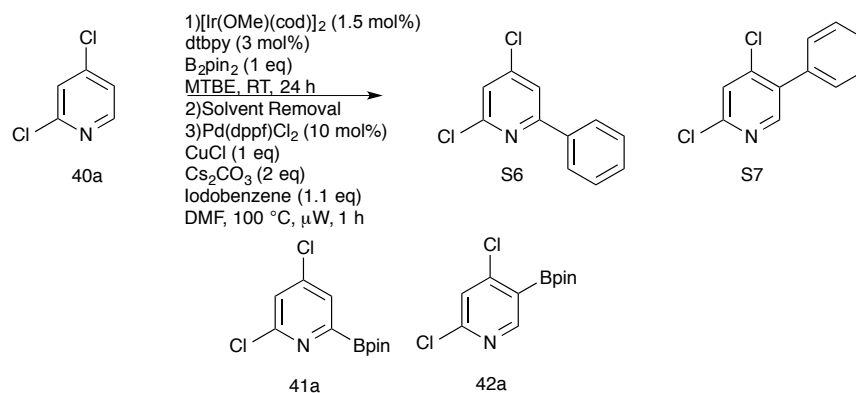

General procedure D was applied to 2,4-dichloropyridine (**40a**) on a 2 mmol scale using iodobenzene (449 mg, 2.2 mmol) as the cross-coupling partner.  $^1\text{H}$  NMR analysis after the C-H borylation step showed 92% conversion to a 50:50 mixture of **41a** and **42a**. Purification by flash column chromatography (24 g column, 0-10% EtOAc/hexane, 25 column volumes) afforded **S15** (179 mg, 40%) and **S16** (125 mg, 28%), both as colourless liquids.

**S15**:  $\nu_{\text{max}}$  (ATR) 3058, 2928, 1742, 1568, 1542, 1408, 1369, 1157, 1068, 844, 800, 796,  $\text{cm}^{-1}$ .  $\delta_{\text{H}}$  (700 MHz,  $\text{CDCl}_3$ ) 7.98 (m, 2H, 2',6'-H), 7.66 (d,  $J = 1.4$ , 1H, 5-H), 7.46-7.50 (m, 3H, 3',4',5'-H) 7.30 (d,  $J = 1.4$ , 1H, 3-H);  $\delta_{\text{C}}$  (176 MHz,  $\text{CDCl}_3$ ) 159.1 (6-C), 152.1 (1'-C), 146.4 (4-C), 136.8 (2-C), 130.4 (4'-C), 129.1 (3',5'-C), 127.2 (2',6'-C), 122.4 (3-C), 119.4 (5-C);  $m/z$  (GCMS-EI) 227 ( $[\text{M}]^+$ ,  $^{37}\text{Cl}^{37}\text{Cl}$ ), 225 ( $[\text{M}]^+$ ,  $^{37}\text{Cl}^{35}\text{Cl}$ ), 223 ( $[\text{M}]^+$ ,  $^{35}\text{Cl}^{35}\text{Cl}$ ), 190 ( $[\text{M}-\text{Cl}]^+$ ,  $^{37}\text{Cl}$ ), 188 ( $[\text{M}-\text{Cl}]^+$ ,  $^{35}\text{Cl}$ ), 153  $[\text{M}-2\text{Cl}]^+$ ; HRMS (ASAP) found  $[\text{M}]^+$  222.9953,  $\text{C}_{11}\text{H}_7^{35}\text{Cl}_2\text{N}$  requires  $M$  222.9950.

**S16**:  $\nu_{\text{max}}$  (ATR) 3058, 2928, 1742, 1568, 1542, 1408, 1369, 1157, 1068, 844, 800, 796,  $\text{cm}^{-1}$ .  $\delta_{\text{H}}$  (700 MHz,  $\text{CDCl}_3$ ) 8.34 (s, 1H, 6-H), 7.49-7.46 (m, 4H), 7.42 (d,  $J = 2.0$ , 2H);  $\delta_{\text{C}}$  (176 MHz,  $\text{CDCl}_3$ ) 150.8, 150.7, 144.3, 135.6, 134.4, 129.6, 128.7, 124.9.  $m/z$  (GCMS-EI) 227 ( $[\text{M}]^+$ ,  $^{37}\text{Cl}^{37}\text{Cl}$ ), 225 ( $[\text{M}]^+$ ,  $^{37}\text{Cl}^{35}\text{Cl}$ ), 223 ( $[\text{M}]^+$ ,  $^{35}\text{Cl}^{35}\text{Cl}$ ), 190  $[\text{M}-\text{Cl}]^+$ ,  $^{37}\text{Cl}$ ), 188 ( $[\text{M}-\text{Cl}]^+$ ,  $^{35}\text{Cl}$ ), 153  $[\text{M}-2\text{Cl}]^+$ ; HRMS (ASAP) found  $[\text{M}]^+$  222.9955,  $\text{C}_{11}\text{H}_7^{35}\text{Cl}_2\text{N}$  requires  $M$  222.9950.

*Borylation of 2-chloro-4-(trifluoromethyl)pyridine (40b): Synthesis of 2-chloro-4-(trifluoromethyl)-6-(3-methoxyphenyl)pyridine (S17)*

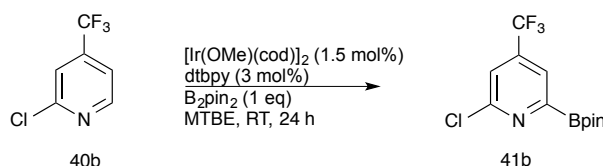

General procedure F was applied to 2-Chloro-4-(trifluoromethyl)pyridine (**40b**) on a 1 mmol scale; Pd(dppf)Cl<sub>2</sub> (37 mg, 0.05 mmol), Cs<sub>2</sub>CO<sub>3</sub> (650 mg, 2 mmol) and 3-iodoanisole (260 mg, 1.1 mmol). The reaction mixture was stirred at room temperature for 24 h giving 72% conversion (<sup>1</sup>H NMR) to **41b**. The Suzuki-Miyaura step was carried out for 3 h. Crude material was purified by flash column chromatography (0-3% Et<sub>2</sub>O in Heptane) to give **S17** as an off-white solid (148 mg, 51% based on **40b**).

**S17**

<sup>1</sup>H NMR (700 MHz, CDCl<sub>3</sub>) δ 7.83 (s, 1H, 5-*H*), 7.59 (t, *J* = 2.3 Hz, 1H, 2'-*H*), 7.58 (d, *J* = 7.9 Hz, 1H, 6'-*H*), 7.48 (s, 1H, 3-*H*), 7.41 (t, *J* = 7.9 Hz, 1H, 5'-*H*), 7.03 (dd, *J* = 7.9, 2.3 Hz, 1H, 4'-*H*), 3.91 (s, 3H, OCH<sub>3</sub>); <sup>13</sup>C NMR (176 MHz, CDCl<sub>3</sub>) δ 160.4 (3'-C), 159.4 (6-C), 152.4 (2-C), 141.8 (q, *J* = 34.3 Hz, 4-C), 138.0 (1'-C), 130.2 (5'-C), 122.3 (q, *J* = 274 Hz, CF<sub>3</sub>), 119.6 (6'-C), 118.7 (q, *J* = 3.7 Hz, 3-C), 116.6 (4'-C), 114.8 (q, *J* = 3.5 Hz, 5-C), 112.6 (2'-C), 55.6 (OCH<sub>3</sub>); ν<sub>max</sub> (neat) 1600, 1561, 1459, 1400, 1333, 1274, 1221, 1177, 1142, 1102 cm<sup>-1</sup>; Accurate Mass (ASAP) *m/z* found [M]<sup>+</sup> 287.0325 (C<sub>13</sub>H<sub>9</sub><sup>35</sup>ClF<sub>3</sub>NO) requires *M* 287.0330.

*Borylation-cross-coupling of methyl-2-chloroisonicotinate (40c): Synthesis of methyl 2-chloro-6-(4-(methoxycarbonyl)phenyl)isonicotinate (S18)*

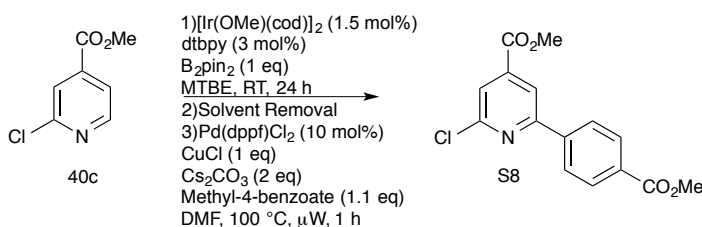

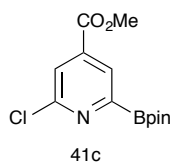

General procedure D was applied to methyl 2-chloroisonicotinate (**40c**) on a 1 mmol scale using methyl 4-iodobenzoate (288 mg, 1.1 mmol) as the cross-coupling partner.  $^1\text{H}$  NMR analysis after the C-H borylation step showed 73% conversion to **41c**. Purification by flash column chromatography (40 g column, 0-40% ether in hexanes, 20 column volumes) afforded **S18** as a white solid (70 mg, 53%). m.p. 167 - 168 °C;  $\nu_{\text{max}}$  (ATR) 1720, 1551, 1402, 1315, 1266, 1108, 968, 763  $\text{cm}^{-1}$ .  $\delta_{\text{H}}$  (700 MHz,  $\text{CDCl}_3$ ) 8.25 (1H, d,  $J$  = 1.4, 5-*H*), 8.15-8.12 (4H, m, 2',3',5',6'-*H*), 7.85 (1H, d,  $J$  = 1.4, 3-*H*), 4.00 (3H, s, Py- $\text{CO}_2\text{CH}_3$ ), 3.95 (3H, s, Ph- $\text{CO}_2\text{CH}_3$ ).  $\delta_{\text{C}}$  (176 MHz,  $\text{CDCl}_3$ ) 166.7 (4'- $\text{CO}_2$ ), 164.5 (4- $\text{CO}_2$ ), 157.8 (6-C), 152.5 (4-C), 141.2 (2-C), 141.0 (1'-C), 131.6 (4'-C), 130.3 (2C,3', 5'-C), 127.2 (2C,2', 6'-C), 123.0 (3-C), 118.7 (5-C), 53.3 (4- $\text{CO}_2\text{CH}_3$ ), 52.4 (4'- $\text{CO}_2\text{CH}_3$ ).  $m/z$  (GCMS-EI) 307 ( $[\text{M}]^+$ ,  $^{37}\text{Cl}$ ), 305 ( $[\text{M}]^+$ ,  $^{35}\text{Cl}$ ), 276 ( $[\text{M}-\text{OCH}_3]^+$ ,  $^{37}\text{Cl}$ ), 274 ( $[\text{M}-\text{OCH}_3]^+$ ,  $^{35}\text{Cl}$ ), 248 ( $[\text{M}-\text{CO}_2\text{CH}_3]^+$ ,  $^{37}\text{Cl}$ ), 246 ( $[\text{M}-\text{CO}_2\text{CH}_3]^+$ ,  $^{35}\text{Cl}$ ), 189 ( $[\text{M}-(\text{CO}_2\text{CH}_3)_2]^+$ ,  $^{37}\text{Cl}$ ), 187 ( $[\text{M}-(\text{CO}_2\text{CH}_3)_2]^+$ ,  $^{35}\text{Cl}$ ), 152  $[\text{M}-(\text{CO}_2\text{CH}_3)_2\text{Cl}]^+$ . HRMS (ASAP) found  $[\text{M}]^+$  305.0451,  $\text{C}_{15}\text{H}_{12}^{35}\text{ClNO}_4$  requires  $M$  305.0449.

**Borylation of methyl 2-methoxyisonicotinate (40d):** Synthesis of *methyl-2-methoxy-6-(3-methoxyphenyl)isonicotinate (S19)*

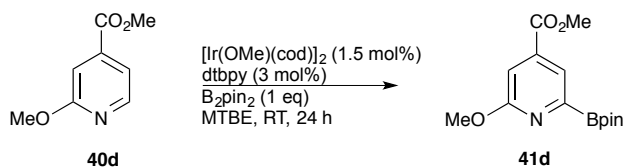

General procedure F applied to Methyl-2-methoxyisonicotinate (**40d**) on a 1 mmol scale; Pd(dppf)Cl<sub>2</sub> (37 mg, 0.05 mmol), Cs<sub>2</sub>CO<sub>3</sub> (650 mg, 2 mmol) and 3-iodoanisole (260 mg, 1.1 mmol). The reaction mixture was stirred at room temperature for 24 h giving 57% conversion (<sup>1</sup>H NMR) to **41d**. The Suzuki-Miyaura step was carried out for 16 h. Crude material was purified by flash column chromatography (7% EtOAc in Heptane) to give **S19** as an off-white solid (111 mg, 41% based on **40e**).

### S19

<sup>1</sup>H NMR (700 MHz, CDCl<sub>3</sub>) δ 7.88 (s, 1H, 5-*H*), 7.67 (m, 2H, 2', 6'-*H*), 7.38 (t, *J* = 8.0 Hz, 1H, 5'-*H*), 7.25 (s, 1H, 3-*H*), 6.97 (dd, *J* = 8.0, 2.4 Hz, 1H, 4'-*H*), 4.07 (s, 3H, 2-COCH<sub>3</sub>), 3.96 (s, 3H, CO<sub>2</sub>CH<sub>3</sub>), 3.89 (s, 3H, 3'-COCH<sub>3</sub>); <sup>13</sup>C (176 MHz, CDCl<sub>3</sub>) δ 165.9 (CO<sub>2</sub>CH<sub>3</sub>), 164.5 (2-C), 160.1 (3'-C), 155.5 (6-C), 141.0 (4-C), 139.9 (1'-C), 129.8 (5'-C), 119.4 (6'-C), 115.0 (4'-C), 112.6 (2'-C), 112.3 (5-C), 109.8 (3-C), 55.5 (2-COCH<sub>3</sub>), 53.9 (3'-COCH<sub>3</sub>), 52.8 (CO<sub>2</sub>CH<sub>3</sub>); ν<sub>max</sub> (neat) 1731, 1568, 1452, 1386, 1354, 1258, 1225, 1208, 1108, 1045 cm<sup>-1</sup>; Accurate Mass (ASAP) *m/z* found [M]<sup>+</sup> 273.1001 (C<sub>15</sub>H<sub>5</sub>NO<sub>4</sub>) requires *M* 273.1008.

*Borylation of methyl 2-(trifluoromethyl)isonicotinate (40e): Synthesis of methyl-2-(trifluoromethyl)-6-(4-methoxyphenyl)isonicotinate (S20)*

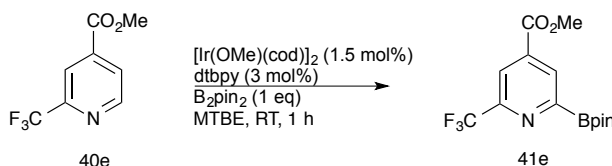

General procedure A applied to methyl-2-(trifluoromethyl)isonicotinate (**40e**) on a 0.2 mmol scale. The reaction mixture was stirred at room temperature for 1 h giving 93% conversion (<sup>1</sup>H NMR) to **41e**. Pd(dppf)Cl<sub>2</sub> (15 mg, 2 x 10<sup>-2</sup> mmol, 5 mol%), K<sub>3</sub>PO<sub>4</sub> (170 mg, 0.8 mmol, 2 equiv.), 4-iodoanisole (100 mg, 0.44 mmol, 1.1 equiv.) and DMAc:H<sub>2</sub>O



(9:1) (5 mL) were added to the crude mixture and heated to 60 °C for 16 h. The reaction was worked up as per General Procedure D/F. Flash column chromatography (3% Ethyl Acetate in Heptane) provided **S20** as a white solid (82 mg, 66% based on **40e**).

## S20

$^1\text{H}$  NMR (600 MHz,  $\text{CDCl}_3$ )  $\delta$  8.42 (s, 1H, 5-*H*), 8.10 (m, 2H, 2', 6'-*H*), 8.05 (d, *J* = 0.9 Hz, 1H, 3-*H*), 7.02 (m, 2H, 3', 5'-*H*), 4.02 (s, 3H,  $\text{CO}_2\text{CH}_3$ ), 3.88 (s, 3H,  $\text{OCH}_3$ );  $^{13}\text{C}$  (151 MHz,  $\text{CDCl}_3$ )  $\delta$  164.9 ( $\text{CO}_2\text{CH}_3$ ), 161.7 ( $\text{COCH}_3$ ), 158.8 (6-*C*), 149.1 (q, *J* = 35 Hz, 2-*C*), 139.8 (4-*C*), 129.7 (1'-*C*), 128.8 (2*C*, 2', 6'-*C*), 121.5 (5-*C*), 121.5 (m,  $\text{CF}_3$ ), 117.1 (q, *J* = 2.7 Hz, 3-*C*), 114.5 (2*C*, 3', 5'-*C*), 55.6 ( $\text{OCH}_3$ ), 53.2 ( $\text{CO}_2\text{CH}_3$ );  $^{19}\text{F}$  NMR (376 MHz,  $\text{CDCl}_3$ )  $\delta$  -68.2 (s);  $\nu_{\text{max}}$  (neat) 1735, 1609, 1565, 1519, 1429, 1373, 1257, 1187, 1144, 1072, 1032, 979, 914  $\text{cm}^{-1}$ ; Accurate Mass (ASAP) *m/z* found  $[\text{M}]^+$  311.0769 ( $\text{C}_{15}\text{H}_{12}\text{F}_3\text{NO}_3$ ) requires *M* 311.0784.

*Borylation-Cross-Coupling of methyl 2-fluoroisonicotinate (40f): Synthesis of methyl 2-fluoro-6-(4'-(methoxycarbonyl)phenyl)isonicotinate (S21)*

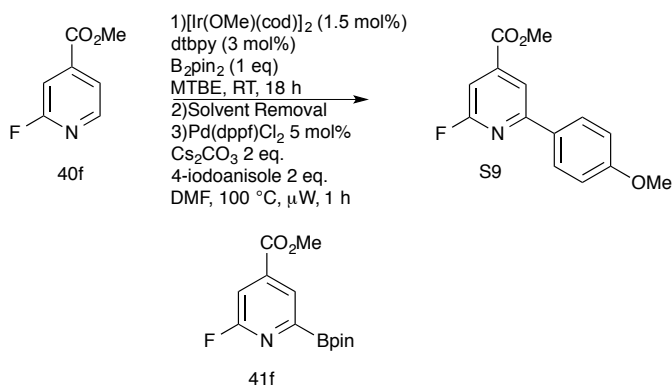

General procedure D was applied to methyl 2-fluoroisonicotinate (**40f**) on a 1.1 mmol scale using 4-iodoanisole (0.51 g, 2.2 mmol, 2 eq.) as the cross-coupling partner in the absence of  $\text{CuCl}$ .  $^1\text{H}$  NMR analysis after the C-H borylation step showed full conversion to **41f** in 18 h. Purification by flash column chromatography (0-20% ethyl acetate in

hexanes) afforded **S21** as a colourless oil (157 mg, 55%).  $\nu_{\text{max}}$  (neat) 1733, 1608, 1568, 1520, 1420, 1396, 1352, 1252, 1206 1177  $\text{cm}^{-1}$ .  $\delta_{\text{H}}$  (700 MHz,  $\text{CDCl}_3$ ) 8.13 (1H, m, 5-*H*), 8.03 (2H, m, 2', 6'-*H*), 7.32 (1H, m, 3-*H*), 7.00 (2H, m, 3', 5'-*H*), 4.00 (3H, s,  $\text{CO}_2\text{CH}_3$ ), 3.88 (3H, s,  $\text{COCH}_3$ ).  $\delta_{\text{C}}$  (176 MHz,  $\text{CDCl}_3$ ) 164.8 (d,  $J = 4.2$  Hz, 4- $\text{CO}_2\text{Me}$ ), 162.3 (d,  $J = 247$  Hz, 2-C), 161.5 (4'-C), 157.2 (d,  $J = 14$  Hz, 6-C), 143.4 (d,  $J = 8$  Hz, 4-C), 129.5 (1'-C), 128.6 (2C, 2', 6'-C), 116.3 (d,  $J = 5$  Hz, 5-C), 114.4 (2C, 3', 5'-C), 106.7 (d,  $J = 40$  Hz, 3-C), 55.6 ( $\text{CO}_2\text{CH}_3$ ), 53.1 ( $\text{COCH}_3$ );  $\delta_{\text{F}}$  (400 MHz,  $\text{CDCl}_3$ ) -66.2.  $m/z$  (GCMS-EI) 261  $[\text{M}]^+$ , 246  $[\text{M}-\text{CH}_3]^+$ , 230  $[\text{M}-\text{OCH}_3]$ , 218, 203, 187, 159.

### Borylation of 2,4-lutidine (**40g**)

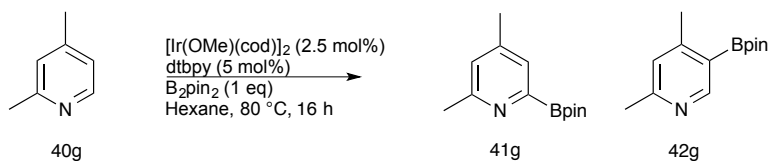

General procedure C was applied to 2,4-lutidine (**40g**) using  $[\text{Ir}(\mu\text{-OMe})\text{COD}]_2$  (17 mg,  $2.5 \times 10^{-2}$  mmol), dtbpy (13 mg,  $5 \times 10^{-2}$  mmol),  $\text{B}_2\text{pin}_2$  (254 mg, 1 mmol) and **40g** (107 mg, 1 mmol). The reaction mixture was stirred at 80 °C for 16 h giving 45% conversion ( $^1\text{H}$  NMR) to afford a 75:25 mixture of **41g**:**42g**.

### Borylation of 4,4'-dimethoxy-2,2'-bipyridine (**40h**)

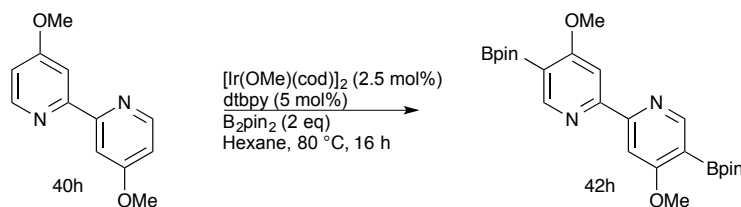

General procedure C applied to 4,4'-dimethoxy-2,2'-bipyridine (**40h**) on a 0.2 mmol scale;  $[\text{Ir}(\mu\text{-OMe})\text{COD}]_2$  (8 mg,  $24.1 \times 10^{-3}$  mmol), dtbpy (7 mg,  $26.1 \times 10^{-3}$  mmol),  $\text{B}_2\text{pin}_2$  (118 mg,  $465 \times 10^{-3}$  mmol, 2 equiv) and **40h** (50 mg,  $231 \times 10^{-3}$  mmol). The reaction mixture was stirred at 80 °C for 16 h then analysed by GC-MS which showed 85% conversion to **42h**. The solvent was removed *in vacuo*, and the residue was redissolved in 10 mL of hexanes, then passed through a celite pad, and the solvent was evaporated to afford a mixture of 3,3'-bisBpin-4,4'-dimethoxy-2,2'-bipyridine (**42h**) accompanied by small amounts of 3-Bpin-4,4'-dimethoxy-2,2'-bipyridine residual boron reagents. A crystal sample of **42h** suitable for single crystal X-ray diffraction was obtained by slow evaporation of a  $\text{CH}_2\text{Cl}_2$  solution.  $\delta_{\text{H}}$  ( $\text{C}_6\text{D}_6$ , 400 MHz) 1.10 (24H, s,  $\text{CCH}_3$ ), 3.36 (6H, s,

OCH<sub>3</sub>), 8.49 (2H, s, 3,3'-H), 9.51 (2H, s, 6,6'-H);  $\delta_C$  (CDCl<sub>3</sub>, 100 MHz) 24.57, 55.83, 83.82, 111.11, 150.05, 156.70, 167.73. m/z (EI) 468 [M<sup>+</sup>], 453 [M-CH<sub>3</sub>]<sup>+</sup>.

#### Borylation of 4,4'-di-tert-butyl-2,2'-bipyridine (**40i**)

General procedure C applied to 4,4'-di-tert-butyl-2,2'-bipyridine (**40i**) on a 0.2 mmol scale; [Ir( $\mu$ -OMe)COD]<sub>2</sub> (6.2 mg, 18.7 x 10<sup>-3</sup> mmol), dtbpy (5 mg, 18.6 x 10<sup>-3</sup> mmol), B<sub>2</sub>pin<sub>2</sub> (95 mg, 374 x 10<sup>-3</sup> mmol, 2 equiv.) and **40i** (50 mg, 187 x 10<sup>-3</sup> mmol). The reaction mixture was stirred at 80 °C for 16 h then analysed by GC-MS which showed full conversion to **41i**. The solvent was removed *in vacuo*, dry C<sub>6</sub>D<sub>6</sub> was added, and the mixture was analysed by NMR spectroscopy.  $\delta_H$  (C<sub>6</sub>D<sub>6</sub>, 500 MHz), 9.28 (d, *J* = 2.0 Hz, 2H, 3, 3'-H), 8.24 (d, *J* = 2.0 Hz, 2H, 5, 5'-H), 1.14 (s, 18H, C(CH<sub>3</sub>)<sub>3</sub>), 1.10 (s, 24H, pin-CH<sub>3</sub>);  $\delta_C$  (C<sub>6</sub>D<sub>6</sub>, 125 MHz) 159.16, 158.00, 120.63, 84.12, 34.75, 30.50, 25.01,;  $\delta_B$  (C<sub>6</sub>D<sub>6</sub>, 128.4 MHz) 31.24. m/z (EI) 520 [M<sup>+</sup>], 505 [M-Me]<sup>+</sup>.

#### Borylation-cross-coupling of 4,4'-di-tert-butyl-2,2'-bipyridine (**40i**): Synthesis of 4,4'-di-tert-butyl-6,6'-diphenyl-2,2'-bipyridine (**46**)

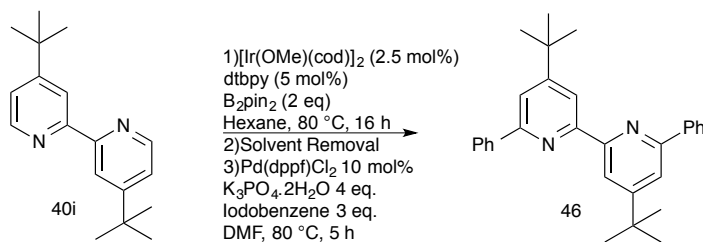

Borylation of 4,4'-di-tert-butyl-2,2'-bipyridine **40i** was undertaken as described above on a 0.2 mmol scale. On complete consumption of **40i**, (GC/MS), the solvent was removed *in vacuo*, and PhI (114 mg, 0.56 mmol, 3 equiv.), K<sub>3</sub>PO<sub>4</sub>·2H<sub>2</sub>O (185 mg, 0.75 mmol, 4 equiv.), [(dppf)PdCl<sub>2</sub>] (15 mg, 18 x 10<sup>-3</sup> mmol, 10 mol%) and dry DMF (8 ml) added. The

mixture was heated at 80 °C for 5 h. The product was extracted into hexane, dried (MgSO<sub>4</sub>) and concentrated. Chromatography on silica gel (hexane:diethylether, 9:1) afforded **46** (52 mg, 0.098 mmol, 67%). m.p. 182-184 °C.  $\delta_{\text{H}}$  (CDCl<sub>3</sub>, 400 MHz) 8.61 (d,  $J$  = 1.5 Hz, 2H, 3-*H*), 8.17 (d,  $J$  = 7.6 Hz, 4H, 2''-*H*), 7.78 (d,  $J$  = 1.5 Hz, 2H, 5, 5'-*H*), 7.53 (t,  $J$  = 7.6 Hz, 4H, 3''-*H*), 7.45 (t,  $J$  = 7.6 Hz, 2H, 4''-*H*), 1.47 (s, 18H, C(CH<sub>3</sub>)<sub>3</sub>);  $\delta_{\text{C}}$  (CDCl<sub>3</sub>, 100 MHz) 161.68, 156.57, 140.07, 128.87, 128.82, 127.26, 117.63, 117.13, 34.17, 29.76; m/z (EI) 420 [M<sup>+</sup>], 405 [M-Me]<sup>+</sup>; Anal. Calcd. for C<sub>30</sub>H<sub>32</sub>N<sub>2</sub>: C 85.76%, H 7.67%, N 6.66%; found C 85.61%, H 7.66%, N 6.55%.

#### Borylation of 2,5-lutidine (**43a**)

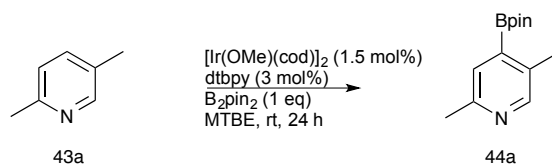

General procedure B was applied to 2,5-lutidine (**43a**), on a 1 mmol scale. The reaction mixture was stirred at room temperature for 24 h giving 10% conversion (<sup>1</sup>H NMR) to **44a**.

#### Borylation of 2,5-dichloropyridine (**43b**)

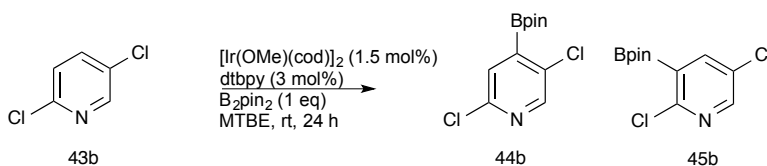

General procedure B was applied to 2,5-dichloropyridine (**43b**), on a 1 mmol scale. The reaction mixture was stirred at room temperature for 24 h giving 93% conversion (<sup>1</sup>H NMR) to **44b** and **45b** in a 84:16 ratio. GCMS analysis showed trace amounts of bis-borylated products.

*Borylation of methyl 6-chloronicotinate (**43c**); Synthesis of methyl-5-(3-methoxyphenyl)-6-chloro-nicotinate (**S22**)*

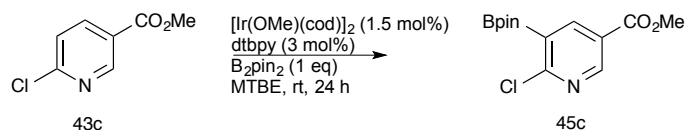

General procedure F was applied to Methyl-6-chloronicotinate (**43c**), on a 1 mmol scale;  $\text{Pd}(\text{dppf})\text{Cl}_2$  (0.04 g, 0.05 mmol),  $\text{Cs}_2\text{CO}_3$  (0.65 g, 2 mmol) and 3-iodoanisole (0.26 g, 1.1 mmol). The reaction mixture was stirred at room temperature for 24 h giving 46% conversion ( $^1\text{H}$  NMR) to **45c**. The Suzuki-Miyaura step was carried out over 1 h. Crude material was purified by flash column chromatography 0-15% EtOAc in Heptane to give **S22** as a white solid (89 mg, 32% based on **43c**).

**S22**

$^1\text{H}$  (700 MHz,  $\text{CDCl}_3$ )  $\delta$  8.98 (d,  $J = 2.2$  Hz, 1H, 2-*H*), 8.27 (d,  $J = 2.2$  Hz, 1H, 4-*H*), 7.39 (m, 1H, 5'-*H*), 7.03 (m, 1H, 6'-*H*), 6.99 (m, 2H, 2', 4'-*H*), 3.97 (s, 3H,  $\text{CO}_2\text{CH}_3$ ), 3.86 (s, 3H,  $\text{COCH}_3$ );  $^{13}\text{C}$  (176 MHz,  $\text{CDCl}_3$ )  $\delta$  165.2 ( $\text{CO}_2\text{Me}$ ), 159.7 (3'-C), 153.9 (6-C), 149.6 (2-C), 140.5 (4-C), 137.9 (1'-C), 136.9 (5-C), 129.8 (5'-C), 125.4 (3-C), 121.7 (6'-C), 115.1 (ArC), 114.4 (ArC), 55.5 ( $\text{COCH}_3$ ), 52.8 ( $\text{CO}_2\text{CH}_3$ )  $\delta$ ;  $\nu_{\text{max}}$  (neat) 1728, 1590, 1394, 1316, 1265, 1228, 1129, 1036, 907; Accurate Mass (ASAP)  $m/z$  found  $[\text{M}+\text{H}]^+$  277.0506 ( $\text{C}_{14}\text{H}_{12}^{35}\text{ClNO}_3$ ) requires  $M$  277.0497.

*Borylation of 2,5-difluoropyridine (**43d**)*

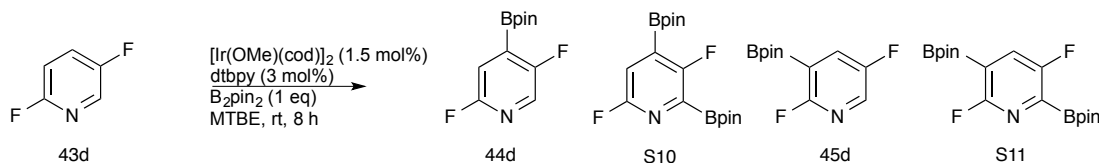

General procedure B was applied to 2,5-difluoropyridine (**43d**), on a 1 mmol scale. The reaction mixture was stirred at room temperature for 8 h giving full conversion ( $^1\text{H}$  NMR) to afford mono and bis borylated products **44d**:**S23**:**45d**:**S24** in a ratio of 72:3:19:6.

*Borylation of methyl 6-fluoronicotinate (**43e**): Synthesis of methyl 3-(Bpin)-2-fluoronicotinate (**45e**)*

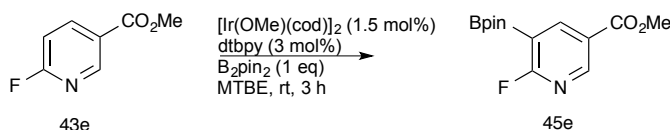

General procedure B was applied to methyl 6-fluoronicotinate (**43e**), on a 0.7 mmol scale. The reaction mixture was stirred at room temperature for 3 h giving full conversion ( $^1\text{H}$  NMR) to **45e**. Following concentration *in vacuo* and absorption onto silica, purification by flash column chromatography (0-10% MeOH in DCM) afforded **45e** (141 mg, 77%) as a white solid.  $\nu_{\text{max}}$  (ATR) 1722, 1604, 1578, 1444, 1421, 1393, 1392, 1390, 1349, 1336, 1260, 1215, 1188, 1171, 1145, 1123, 1079  $\text{cm}^{-1}$ .  $\delta_{\text{H}}$  (600 MHz,  $\text{CDCl}_3$ ) 8.91 (d,  $J$  = 2.5 Hz, 1H, 6-*H*), 8.74 (dd,  $J$  = 7.9, 2.5 Hz, 1H, 4-*H*), 3.93 (s, 3H,  $\text{CO}_2\text{CH}_3$ ), 1.36 (s, 12H, pin- $\text{CH}_3$ );  $\delta_{\text{C}}$  (151 MHz,  $\text{CDCl}_3$ ) 169.1 (d,  $J$  = 251 Hz, C-F), 164.9 ( $\text{CO}_2\text{CH}_3$ ), 153.1 (d,  $J$  = 17 Hz, 6-C), 150.0 (d,  $J$  = 9 Hz, 4-C), 124.2 (d,  $J$  = 5 Hz, 5-C), 84.9 (pinC( $\text{CH}_3$ ) $_2$ ), 52.5, ( $\text{CO}_2\text{CH}_3$ ), 24.9 (pin- $\text{CH}_3$ );  $\delta_{\text{B}}$  (128 MHz,  $\text{CDCl}_3$ ) 29.7;  $\delta_{\text{F}}$  (564 MHz,  $\text{CDCl}_3$ ) -52.2.  $m/z$  (EI) 281  $[\text{MH}]^+$ , 266  $[\text{M}-\text{CH}_3]^+$ , 250  $[\text{M}-\text{OCH}_3]^+$ , 238, 222  $[\text{M}-\text{CO}_2\text{CH}_3]^+$ , 208, 197, 182, 150; HRMS (ASAP) found  $[\text{M}+\text{H}]^+$  281.1349 ( $\text{C}_{13}\text{H}_{18}^{10}\text{BNO}_4\text{F}$ ) requires  $M$  281.1340.

*Tandem borylation/Suzuki-Miyaura cross coupling/reductive dechlorination reaction of 2-chloroisonicotinate (**40c**): Synthesis of methyl 2-(4'-methoxyphenyl)isonicotinate (**48**)*

General procedure D was applied to **40c** on a 2 mmol scale using 4-iodoanisole (0.94 g, 4 mmol, 4equiv.) as the cross-coupling partner.  $^1\text{H}$  NMR analysis after C-H borylation step showed 73% conversion to **41c**. Without purification, the crude cross-coupling reaction product was dissolved in ethanol (20 mL) and ammonium formate (40 mmol, 20equiv.) was added. The reaction vessel was evacuated and backfilled with nitrogen (x 3 cycles) before 10% Pd/C was slowly added under a positive pressure of nitrogen. The reaction was stirred at room temperature for 2 h then filtered through a plug of celite and absorbed onto silica. Purification by flash column chromatography (0-20 % ethyl acetate in hexane) afford **48** as a white solid (0.23 g, 47%) (yield based on 40c).  $\nu_{\text{max}}$  (ATR) 1730, 1607, 1580, 1557, 1516, 1467, 1436, 1421, 1390, 1301, 1274, 1249, 1176, 1111, 1060, 1031  $\text{cm}^{-1}$ .  $\delta_{\text{H}}$  (700 MHz,  $\text{CDCl}_3$ ) 8.76 (1H, m, 2-*H*), 8.21 (1H, s, 5-*H*), 8.00 (2H, m, 2', 6'-*H*), 7.68 (1H, dd,  $J = 6.8, 2.1$ , 3-*H*), 6.99 (2H, m, 3', 5'-*H*), 3.96 (3H, s,  $\text{CO}_2\text{CH}_3$ ), 3.85 (3H, s,  $\text{OCH}_3$ );  $\delta_{\text{C}}$  (176 MHz,  $\text{CDCl}_3$ ) 166.0 ( $\text{CO}_2\text{Me}$ ), 161.0 (4'-C), 158.2 (6-C), 150.4 (2-C), 138.1 (4-C), 131.2 (1'-C), 128.4 (2C, 2',6'-C), 120.4 (3-C), 119.0 (5-C), 114.3 (2C, 3',5'-C), 55.5 ( $\text{OCH}_3$ ), 52.8 ( $\text{CO}_2\text{CH}_3$ ). HRMS (ASAP) found  $[\text{M}+\text{H}]^+$  244.0974,  $\text{C}_{14}\text{H}_{14}\text{NO}_3$  requires  $M$  244.0957.



$^1\text{H}$ ,  $^{13}\text{C}$ ,  $^{11}\text{B}$ ,  $^{19}\text{F}$  NMR Spectra

<sup>1</sup>H NMR (500 MHz, CDCl<sub>3</sub>) - Borylation of 2,2'-bipyridine (**14**)

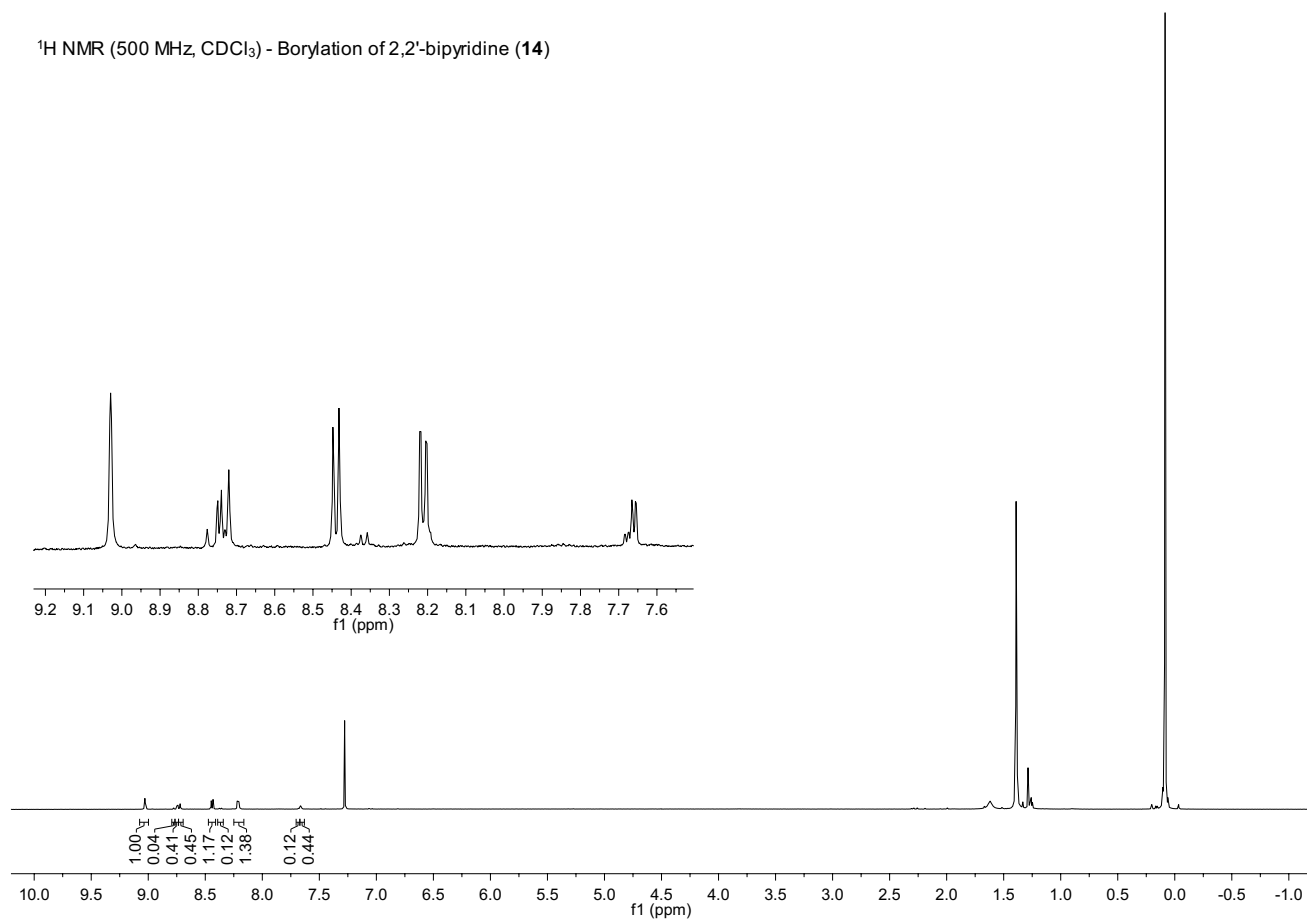

<sup>1</sup>H NMR (400 MHz, CDCl<sub>3</sub>) - Borylation of 2,3-dimethylpyrazine (**17**)

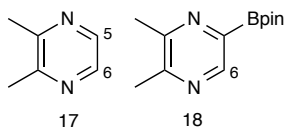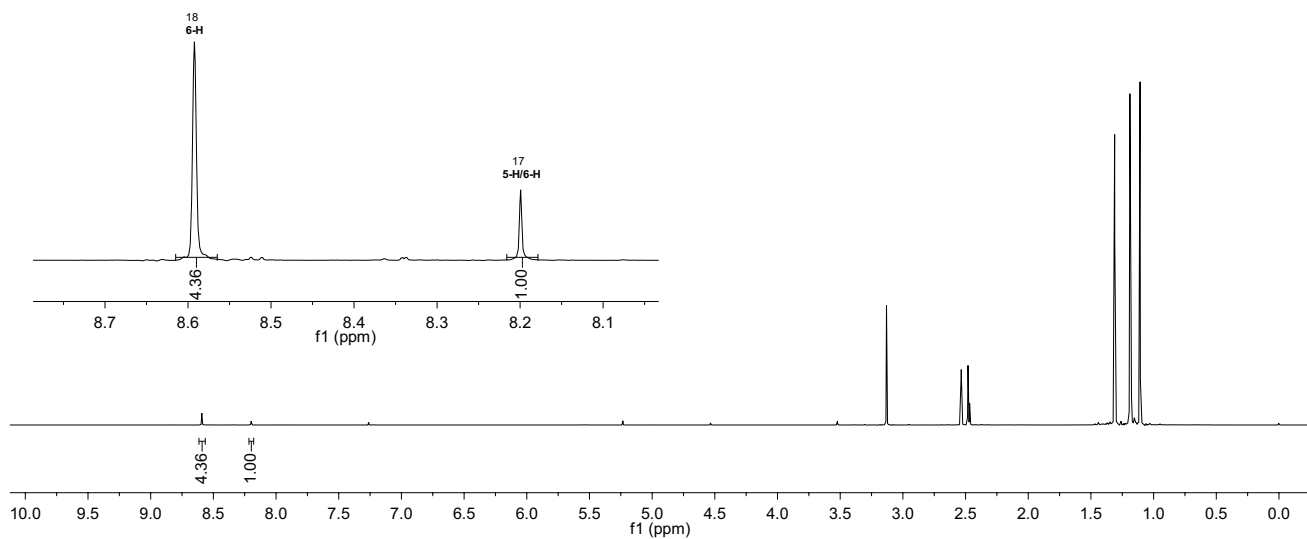

$^2\text{H}$  NMR (92.1 MHz ( $\text{CD}_3)_2\text{CO}$ ) - Deuteration of 2,3-dimethylpyrazine (**17**)

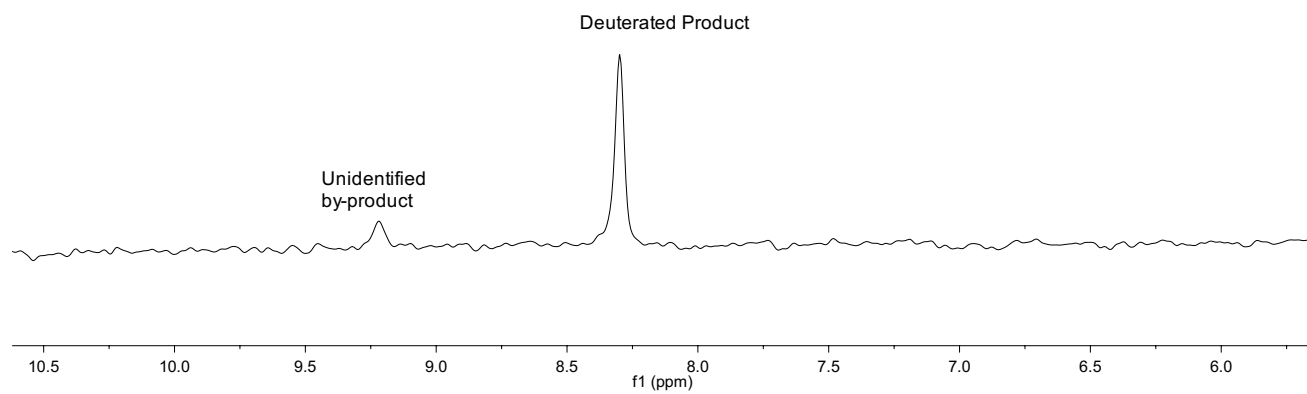

$^1\text{H}$  NMR (400 MHz,  $\text{CDCl}_3$ ) - Borylation of 2-chloro-3-methylpyrazine (**19**)

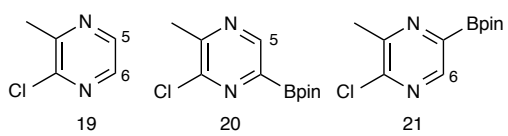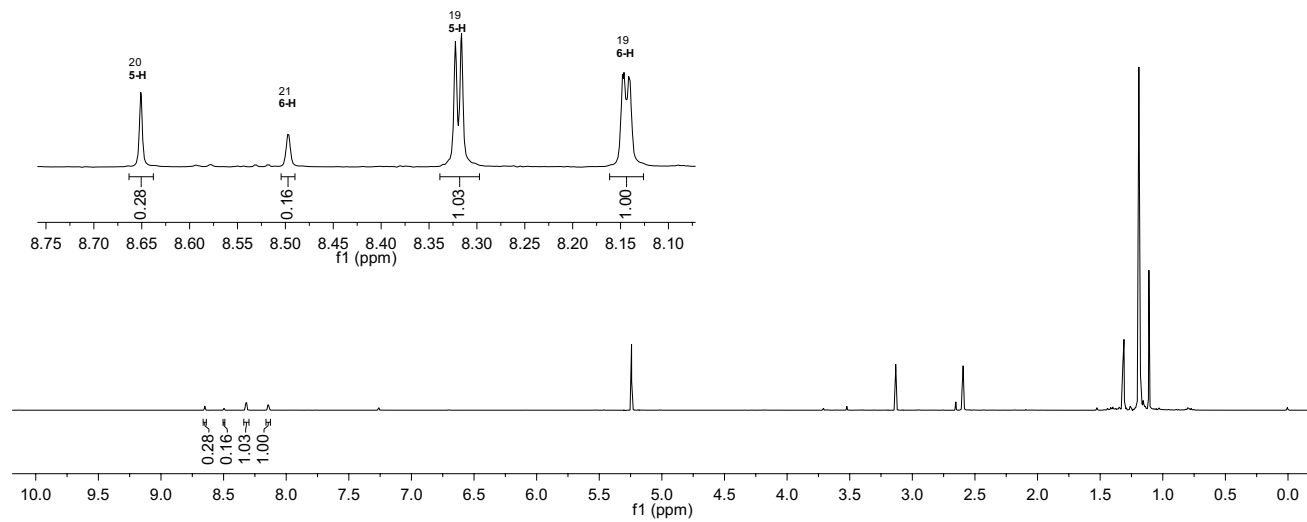

<sup>1</sup>H NMR (400 MHz, CDCl<sub>3</sub>) - Borylation of 2,5-dimethylpyrazine (**22**)

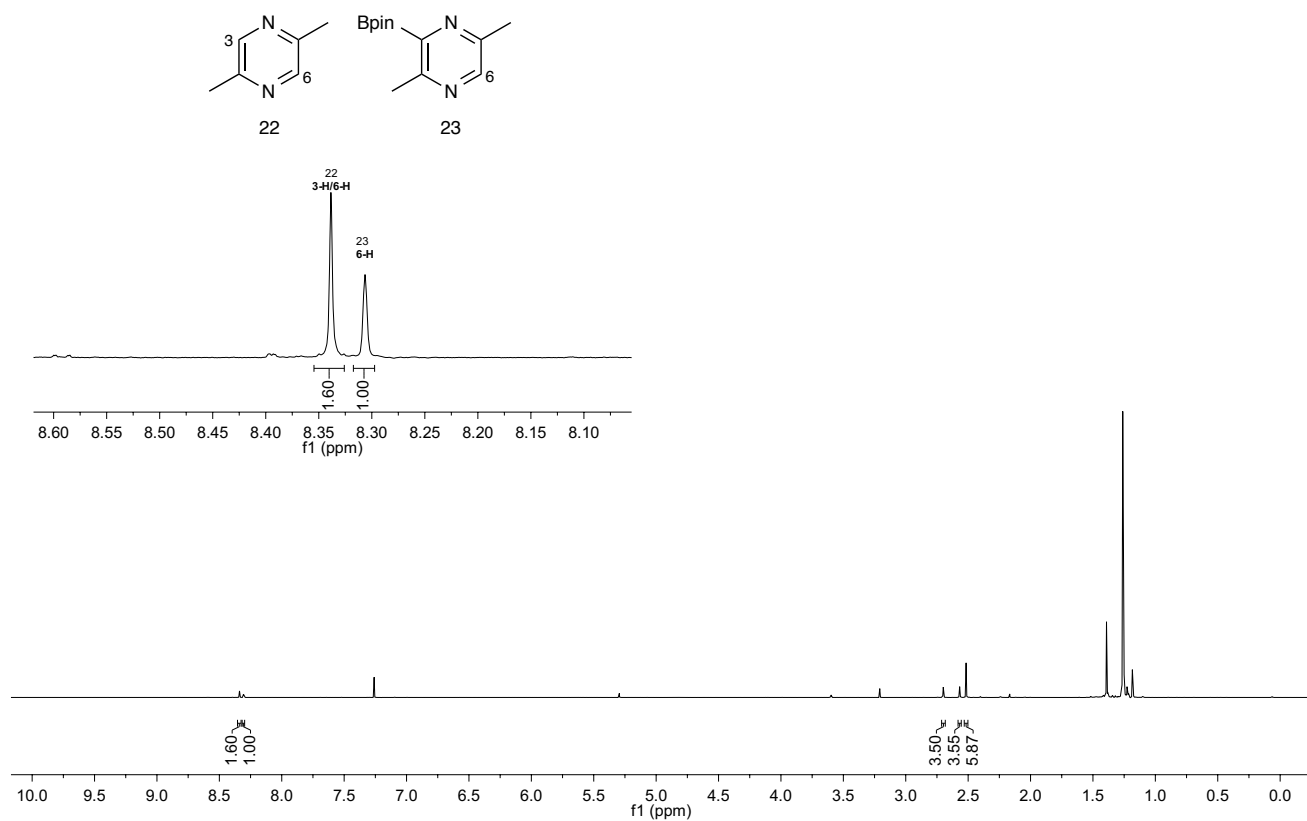

<sup>1</sup>H NMR (400 MHz, CDCl<sub>3</sub>) - Borylation of 2-phenylpyrimidine (**24**)

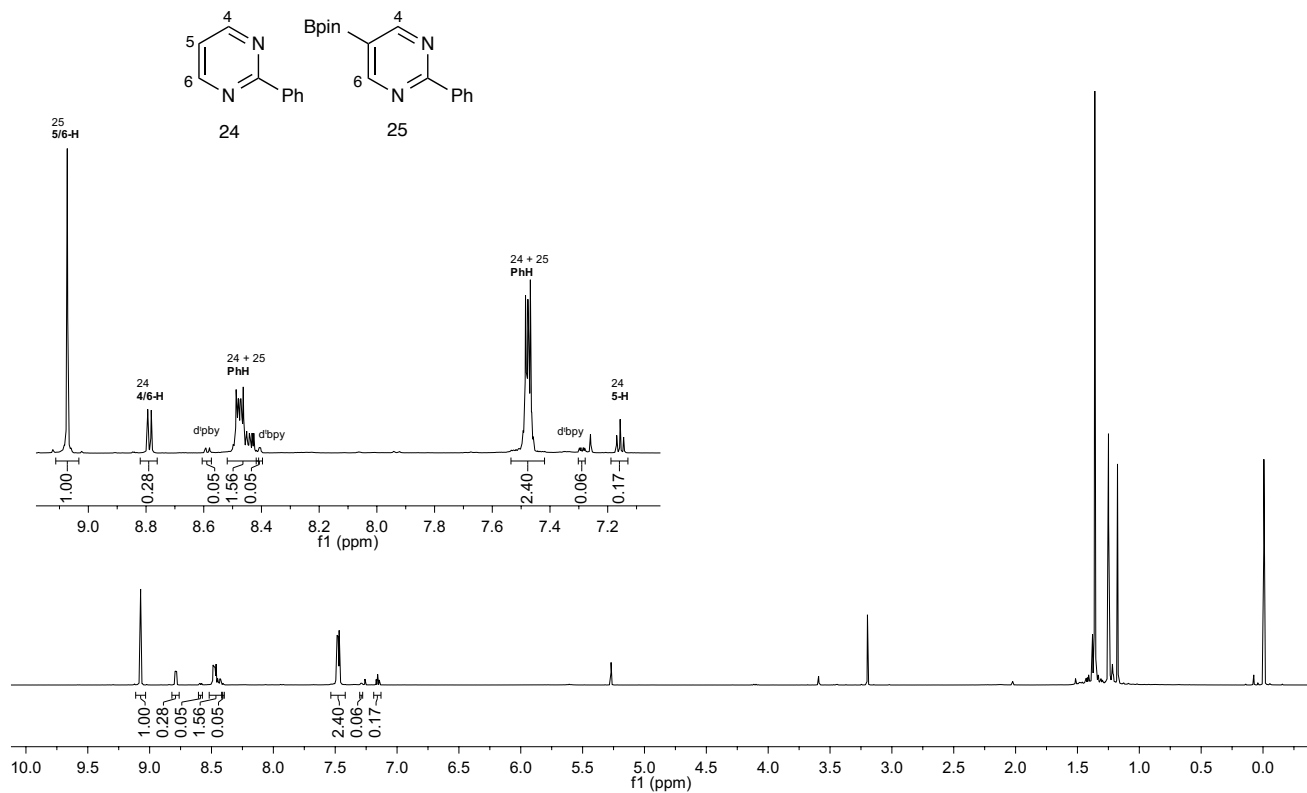

<sup>1</sup>H NMR (400 MHz, CDCl<sub>3</sub>) - Borylation of 3-methylpyridazine (26)

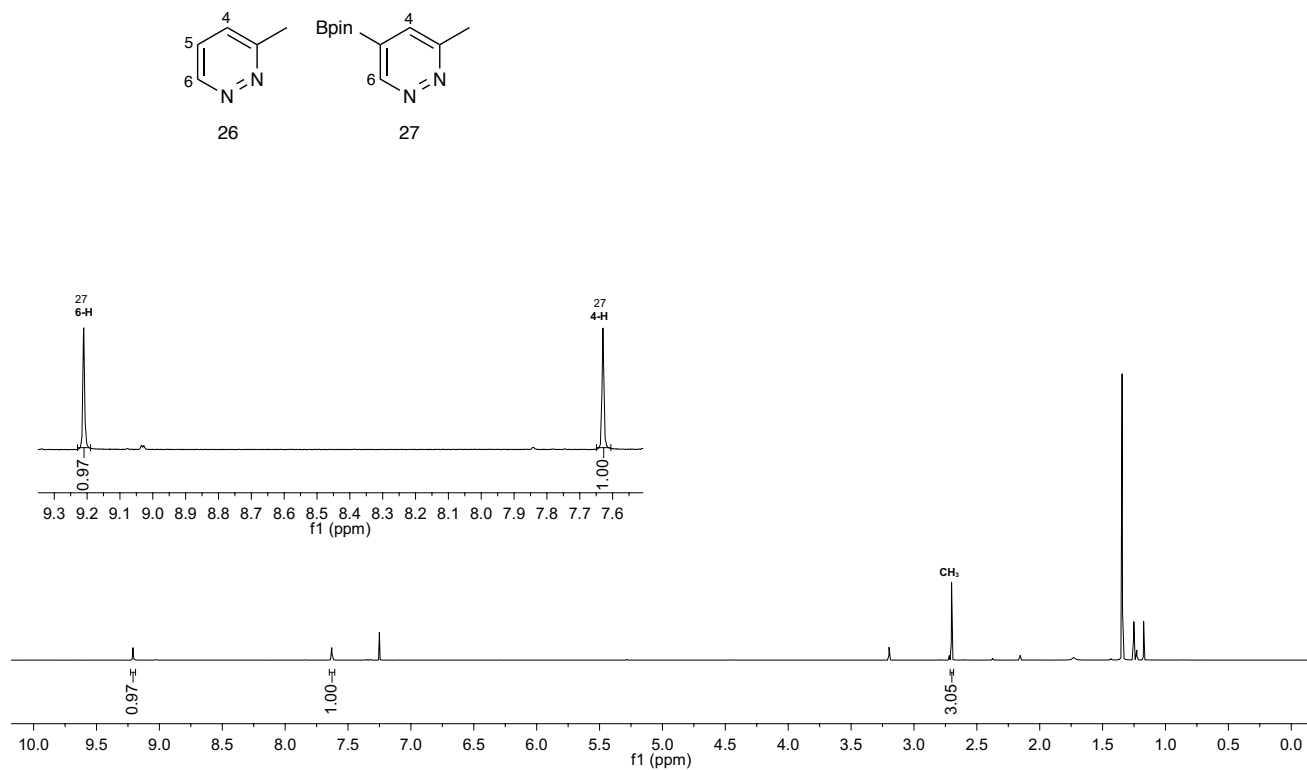

<sup>1</sup>H NMR (600 MHz, CDCl<sub>3</sub>) - Borylation of 2-chloropyridine (32a)

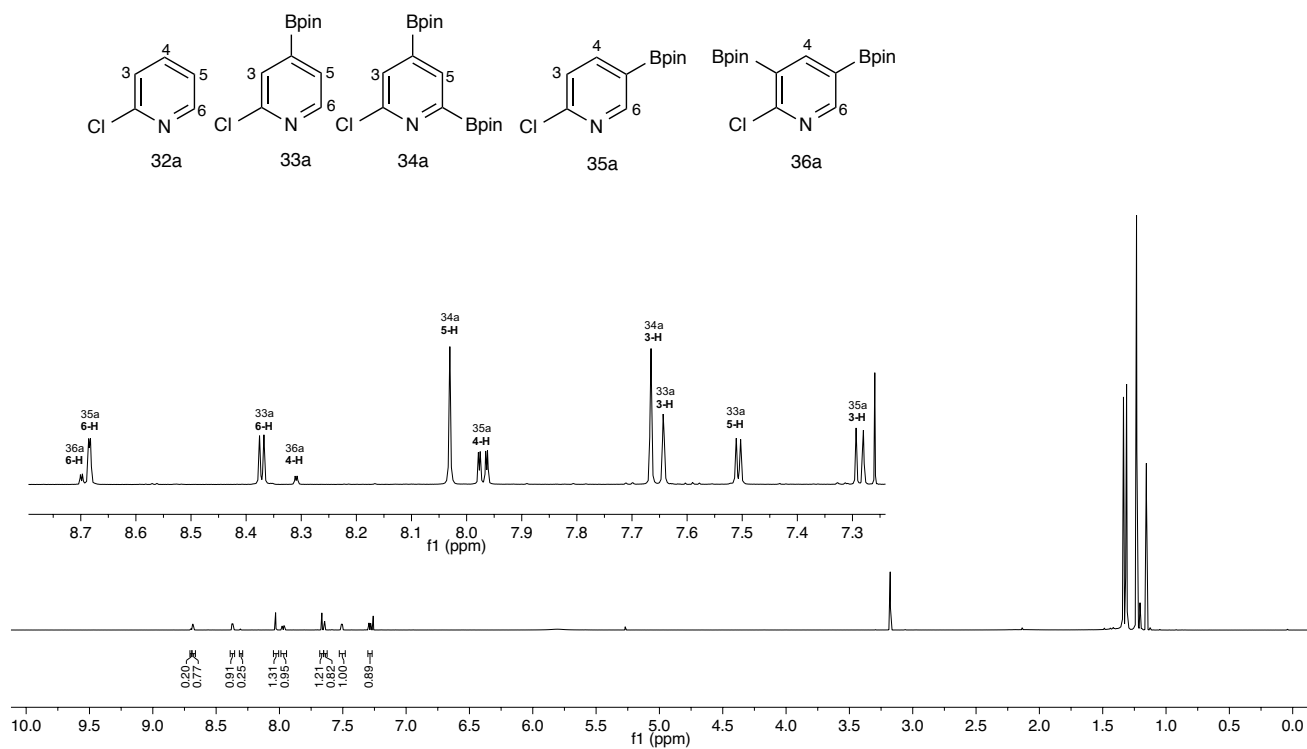

<sup>1</sup>H NMR (400 MHz, CDCl<sub>3</sub>) - Borylation of 2-chloropyridine (**32a**)  
 Boron-limiting conditions

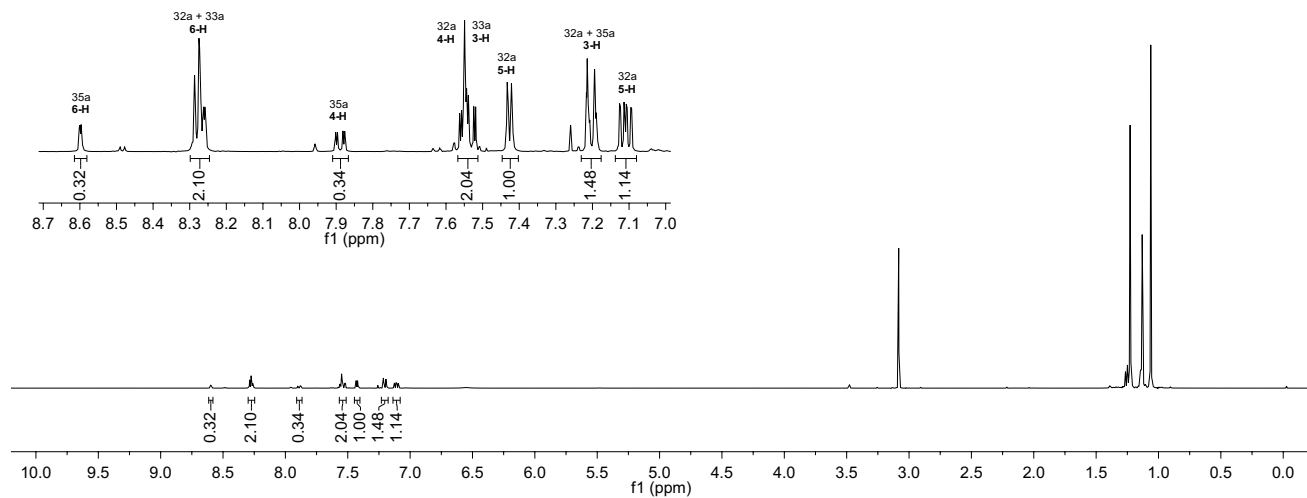

<sup>1</sup>H NMR (600 MHz, CDCl<sub>3</sub>) - Borylation of 2-methoxypyridine (**32b**)

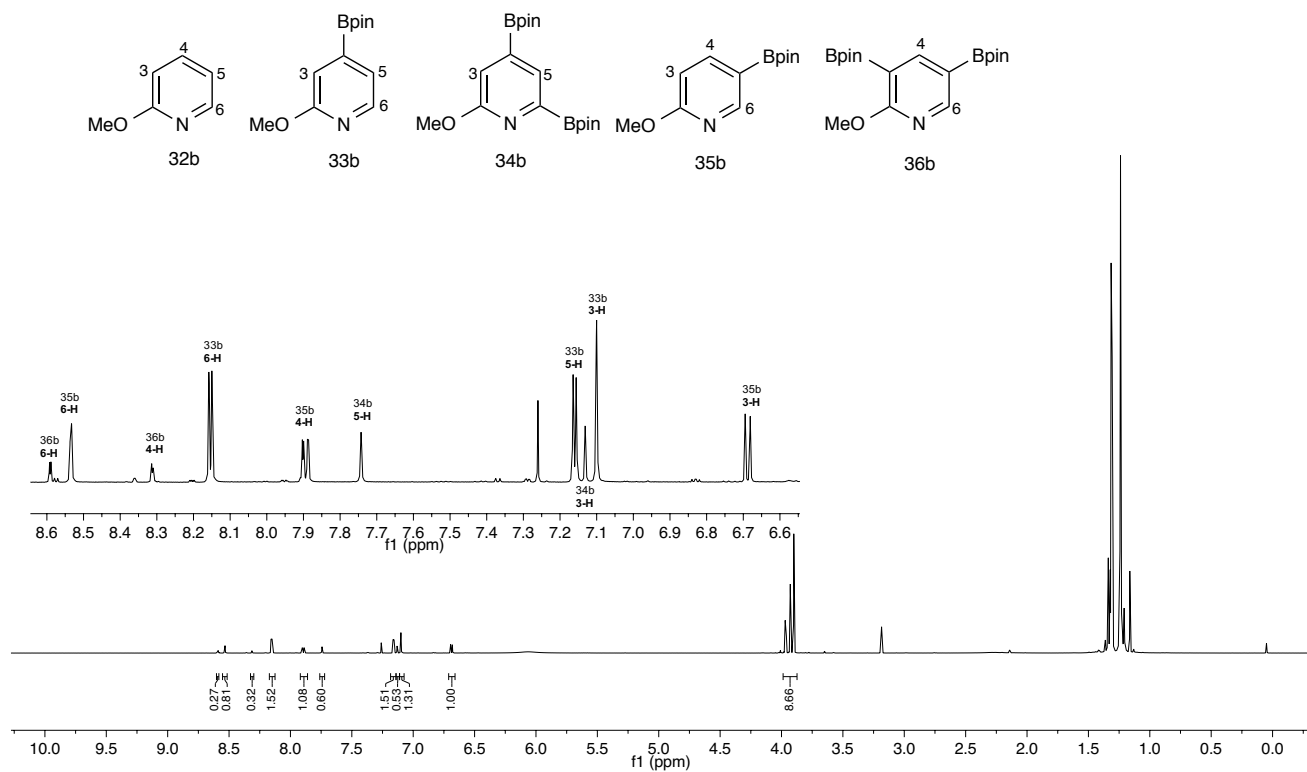

$^1\text{H}$  NMR (400 MHz,  $\text{CDCl}_3$ ) - Borylation of 2-methoxypyridine (**32b**)  
(Boron-limiting conditions)

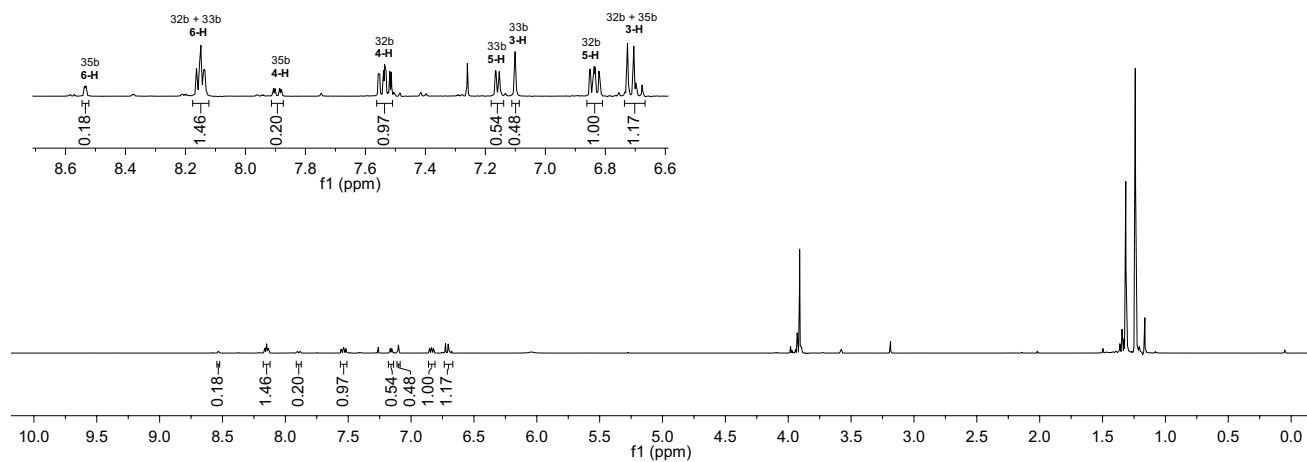

$^1\text{H}$  NMR (600 MHz,  $\text{CDCl}_3$ ) - Borylation of 2-(trifluoromethyl)pyridine (**32c**)

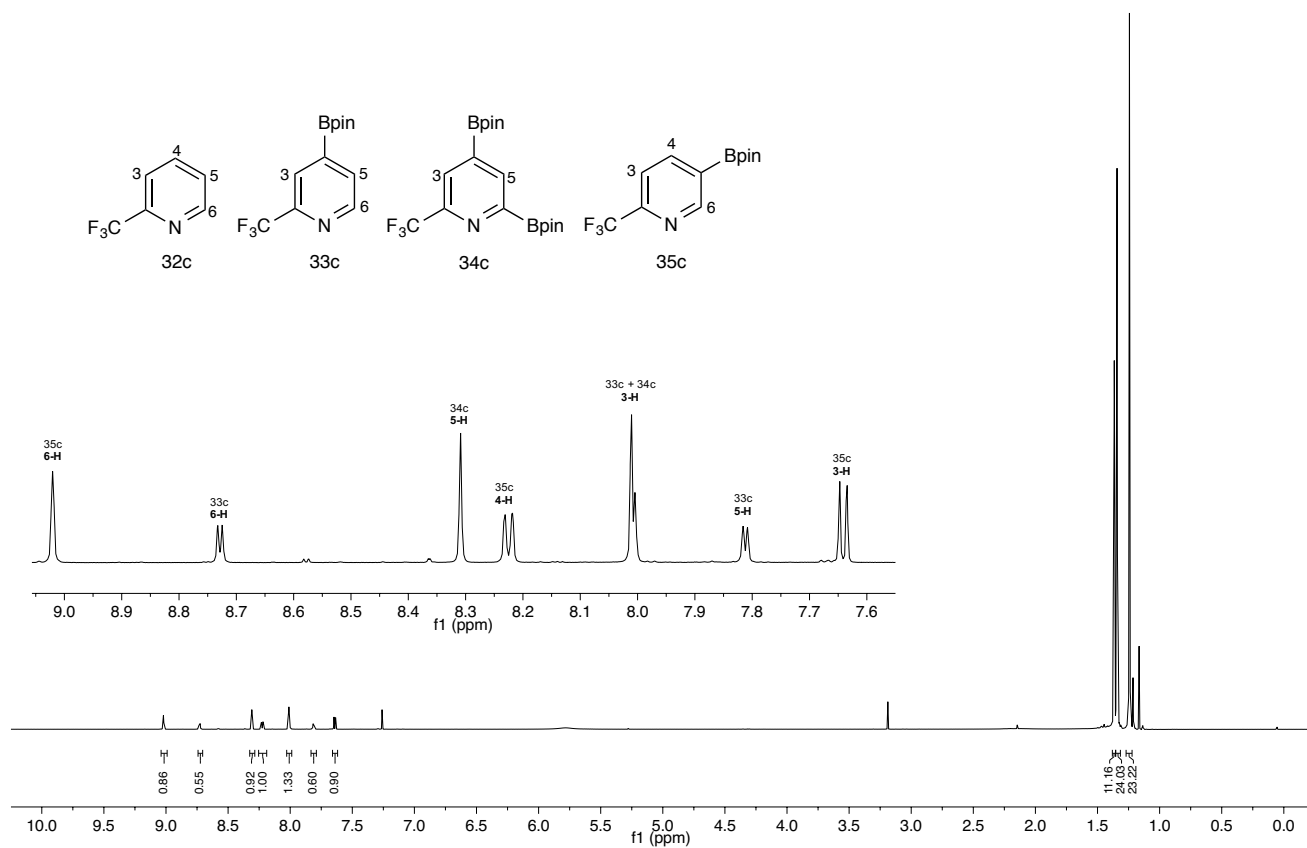

$^1\text{H}$  NMR (400 MHz,  $\text{CDCl}_3$ ) - Borylation of 2-(trifluoromethyl)pyridine (**32c**)  
(Boron-limiting conditions)

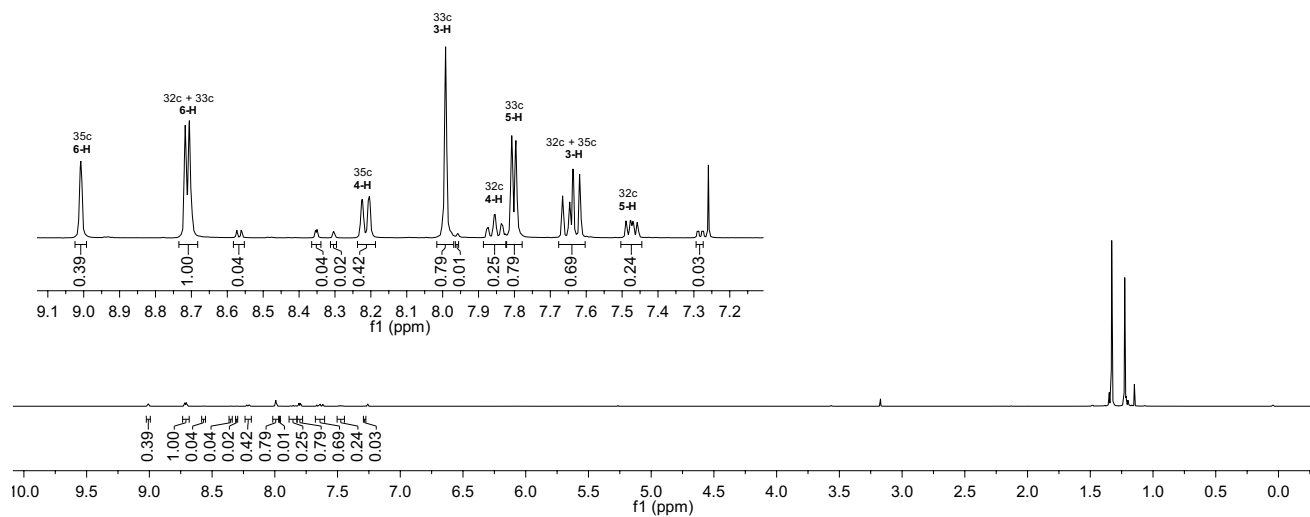

$^1\text{H}$  NMR (400 MHz,  $\text{CDCl}_3$ ) - Borylation of 2-fluoropyridine (**32d**)

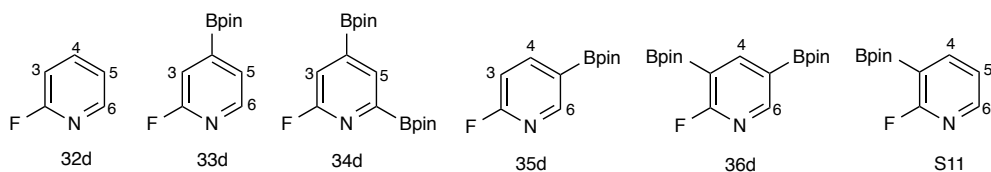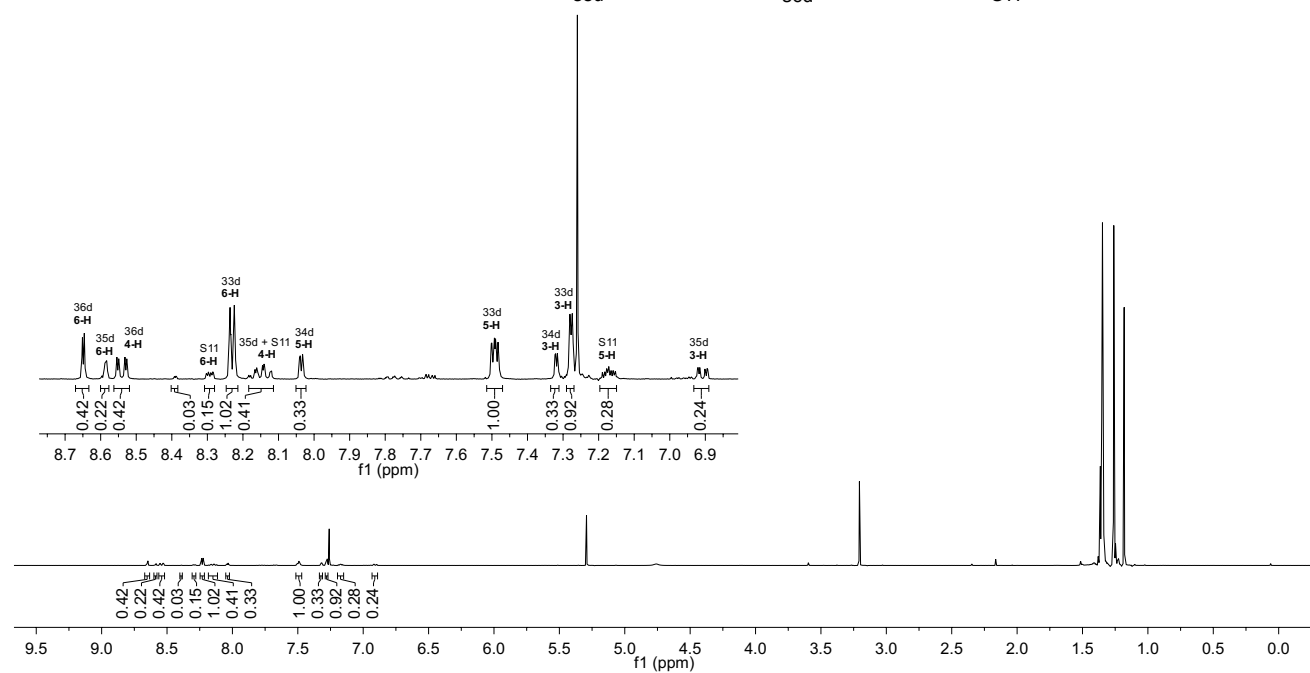



$^1\text{H}$  NMR (400 MHz,  $\text{CDCl}_3$ ) - Borylation of 2-fluoropyridine (**32d**)  
 Boron-limiting conditions

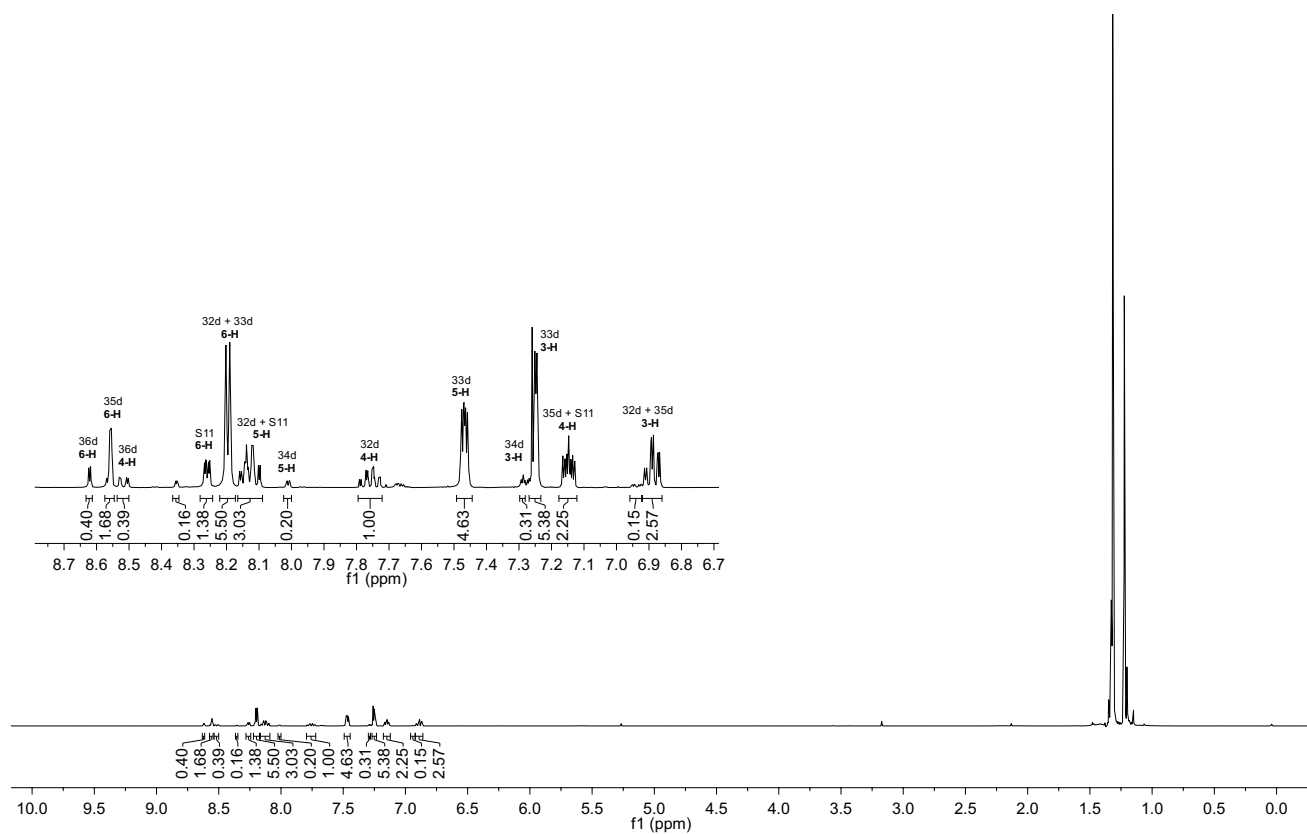

$^1\text{H}$  NMR (400 MHz,  $\text{CDCl}_3$ ) - Borylation of methyl-2-chloronicotinate (**37a**)

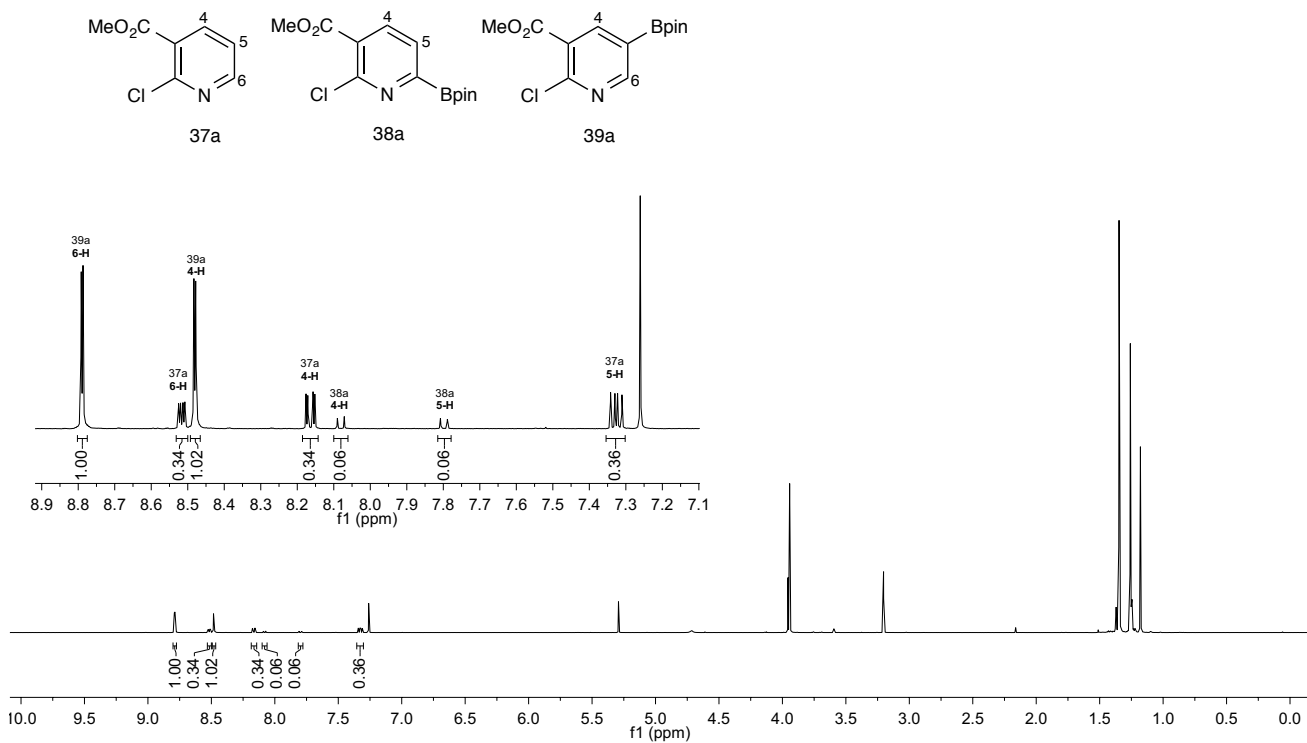

$^1\text{H}$  NMR (400 MHz,  $\text{CDCl}_3$ ) **39a**

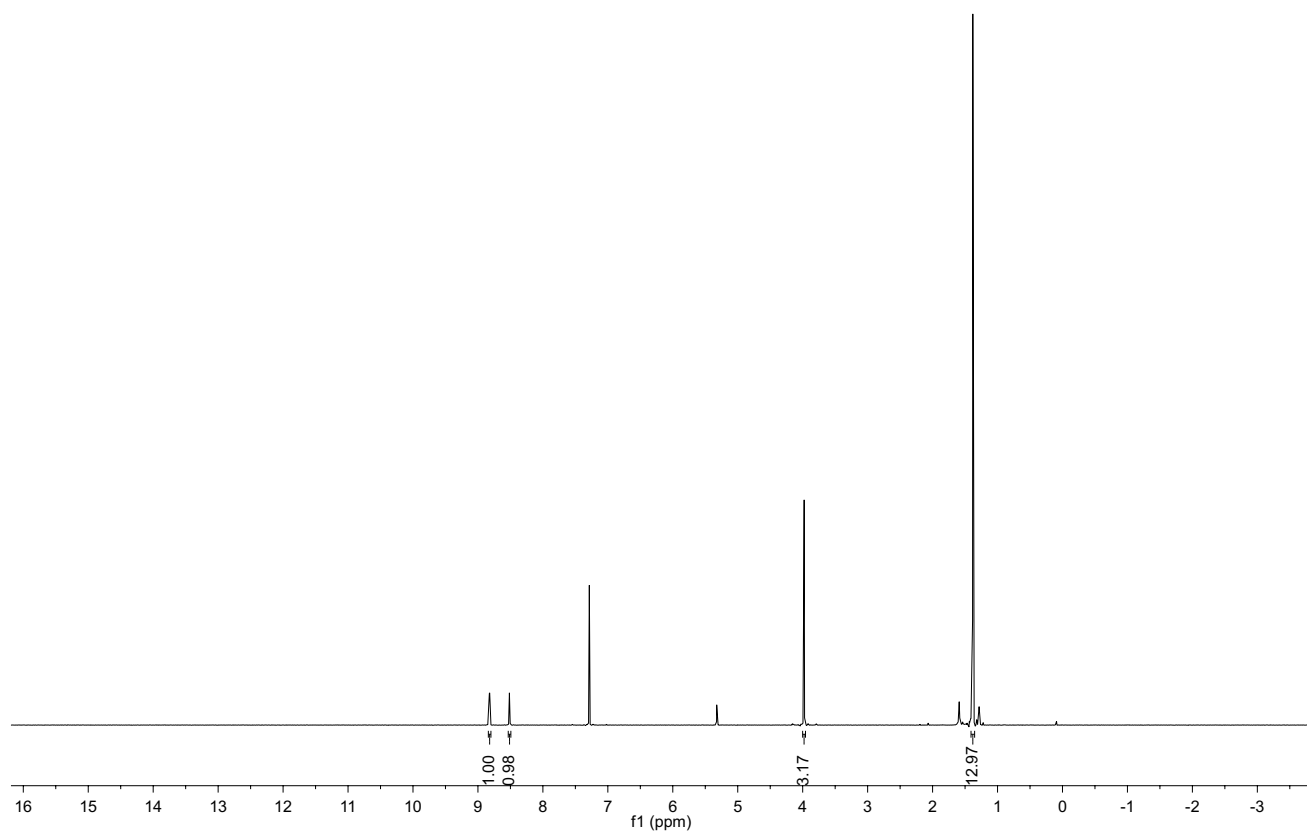

$^{13}\text{C}$  NMR (101 MHz,  $\text{CDCl}_3$ ) - **39a**

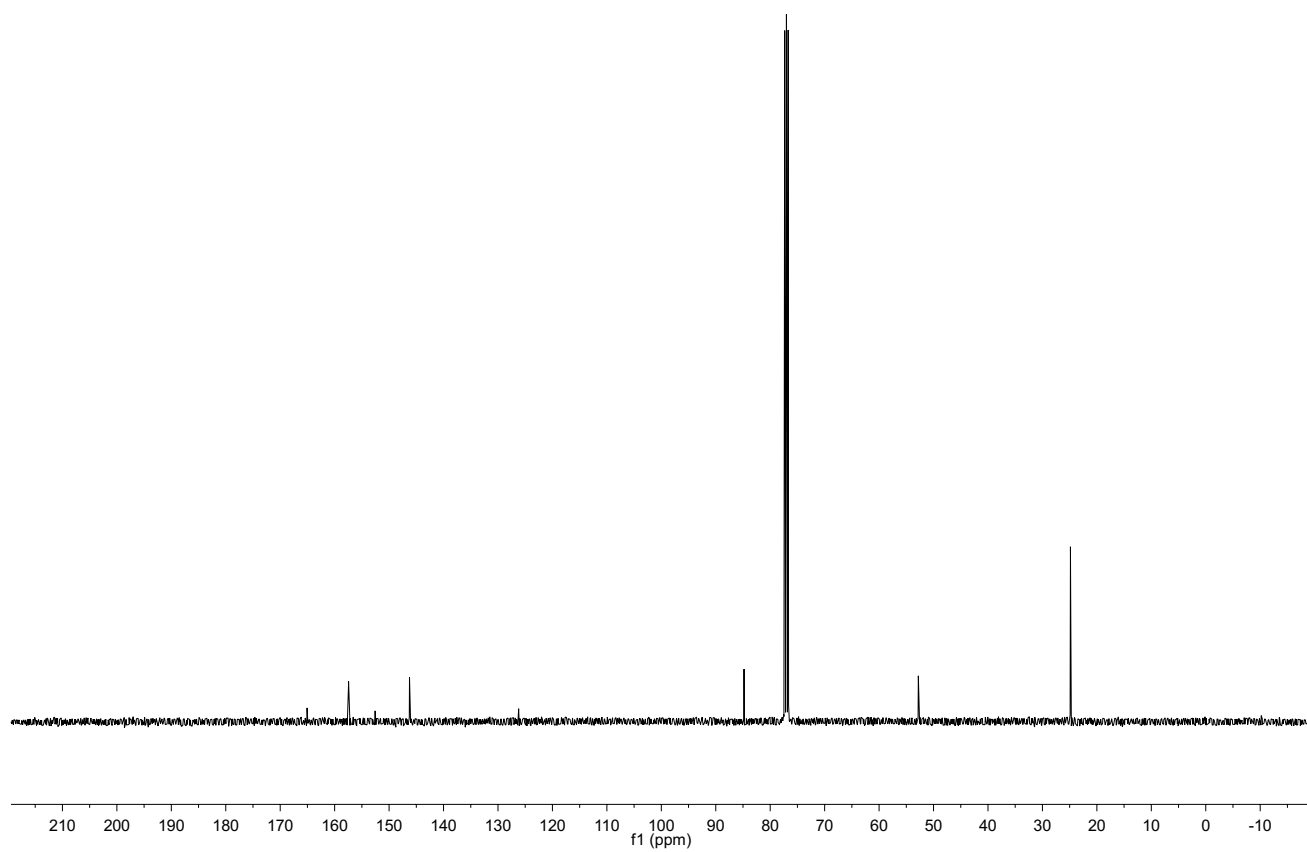

$^1\text{H}$  NMR (400 MHz,  $\text{CDCl}_3$ ) - Borylation of methyl-2-methoxynicotinate (**37b**)

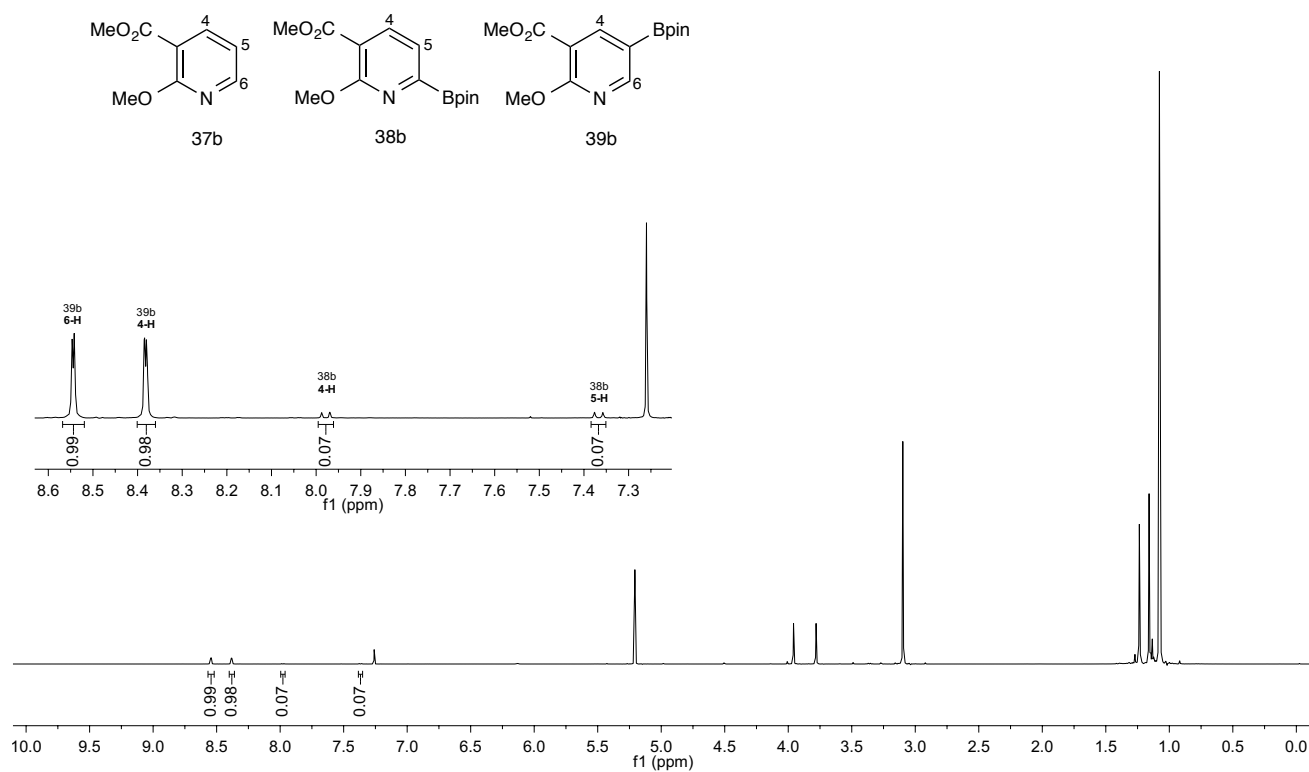

$^1\text{H}$  NMR (400 MHz,  $\text{CDCl}_3$ ) - Borylation of methyl-2-(trifluoromethyl)nicotinate (**37c**)

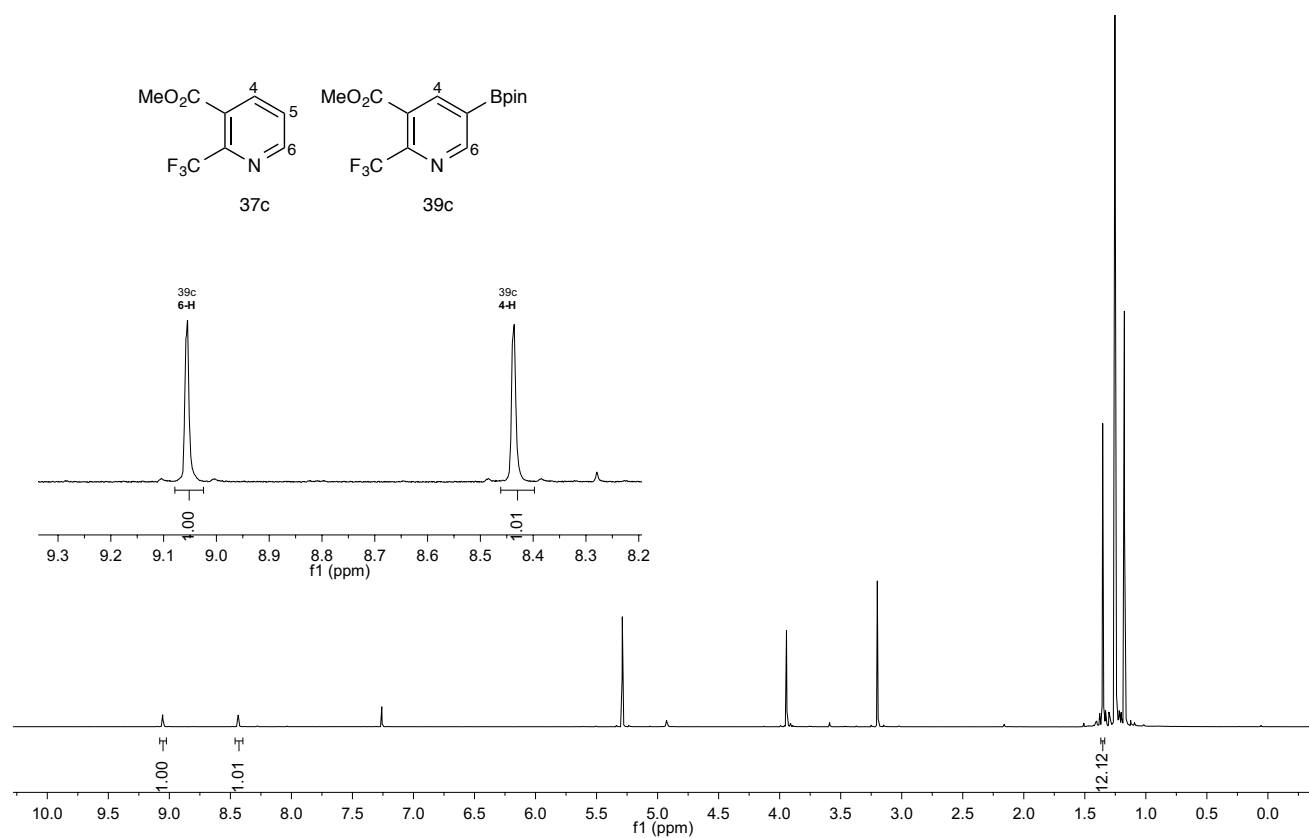

$^1\text{H}$  NMR (400MHz,  $\text{CDCl}_3$ ) - Borylation of methyl-2-fluoronicotinate (**37d**)

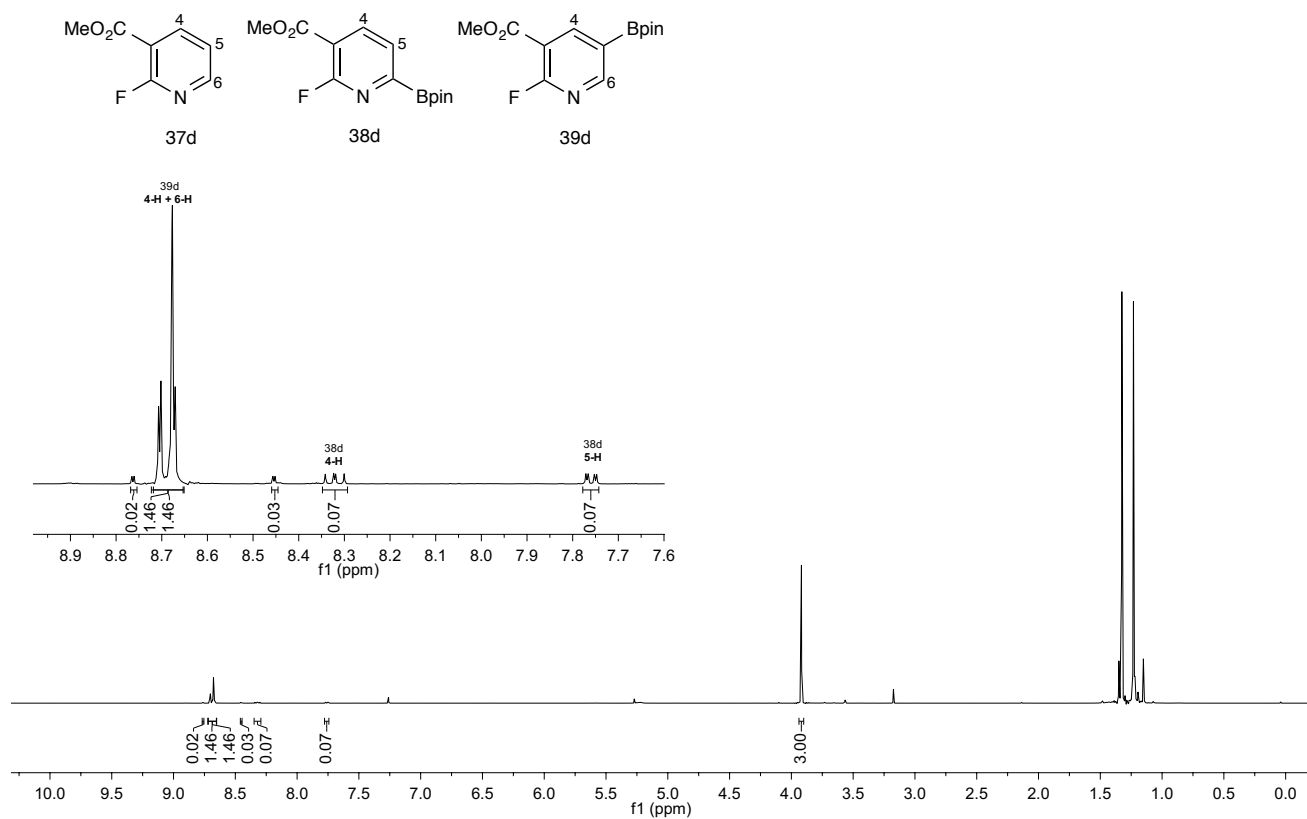

$^1\text{H}$  NMR (400MHz,  $\text{CDCl}_3$ ) - Borylation of 2,3-dichloropyridine (**37e**)

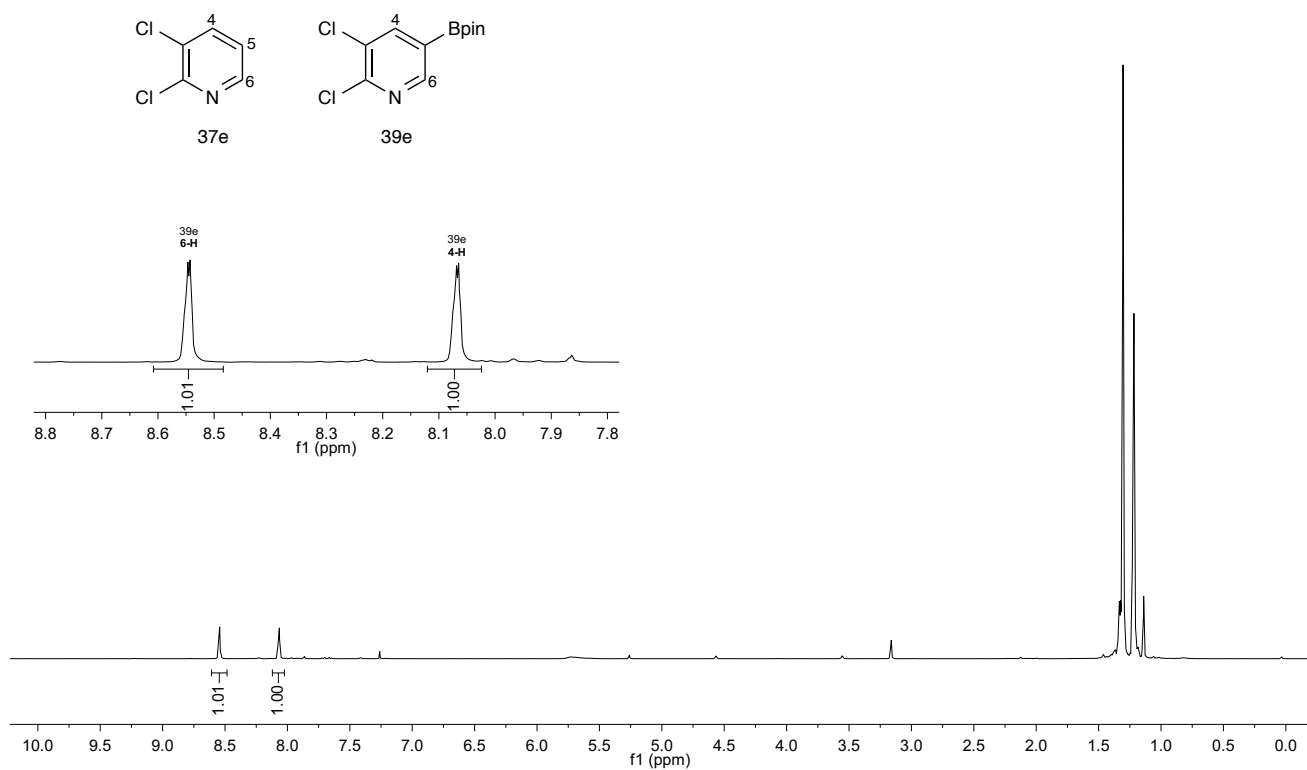

$^1\text{H}$  NMR (700 MHz,  $\text{CDCl}_3$ ) - 2,3-dichloro-5-(Bpin)pyridine (**39e**)

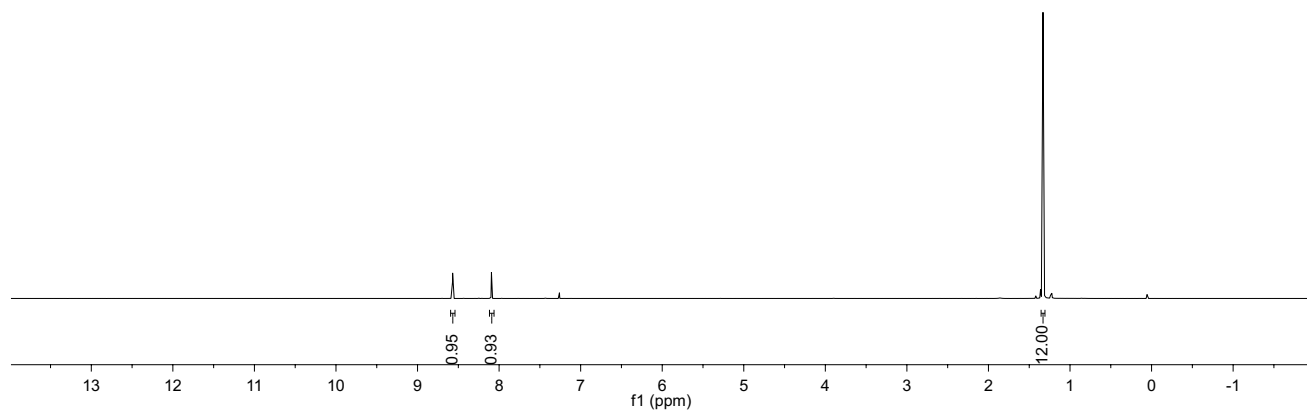

$^{13}\text{C}$  NMR (176 MHz,  $\text{CDCl}_3$ ) - 2,3-dichloro-5-(Bpin)pyridine (**39e**)

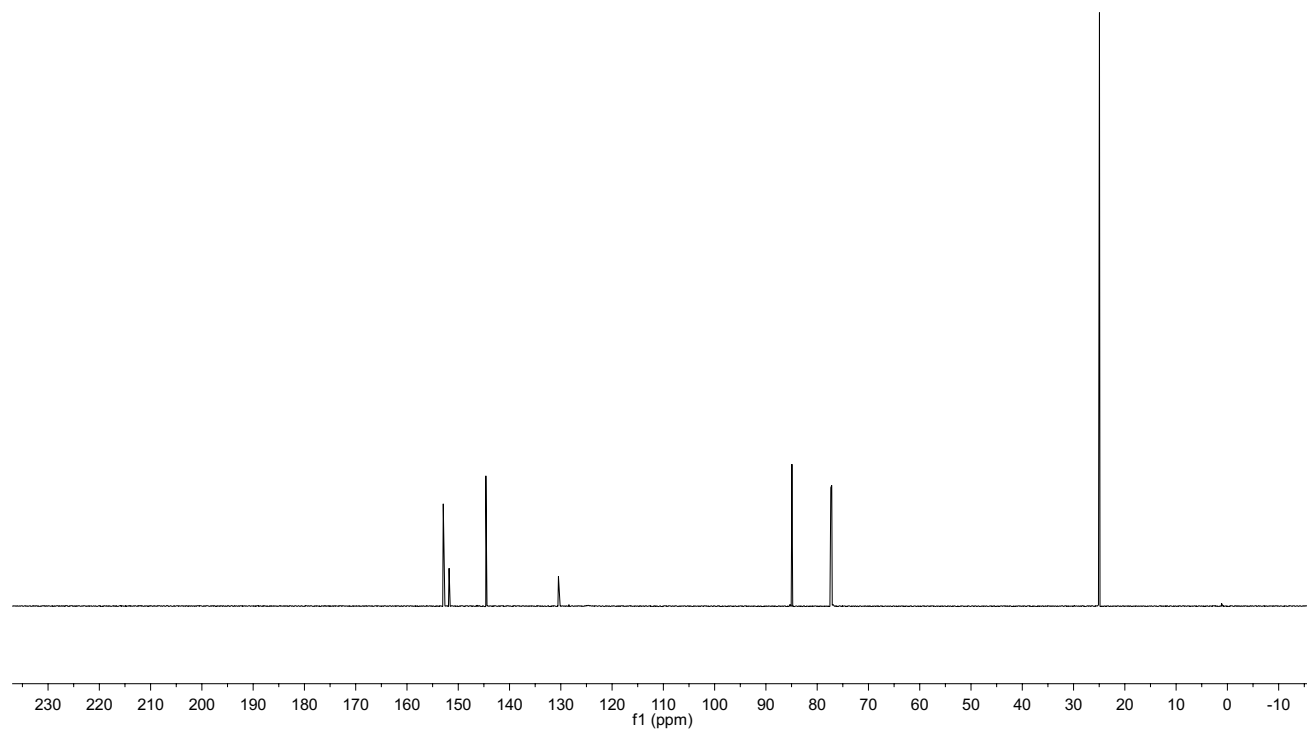

$^{11}\text{B}$  NMR (128 MHz,  $\text{CDCl}_3$ ) - 2,3-dichloro-5-(Bpin)-pyridine (**39e**)

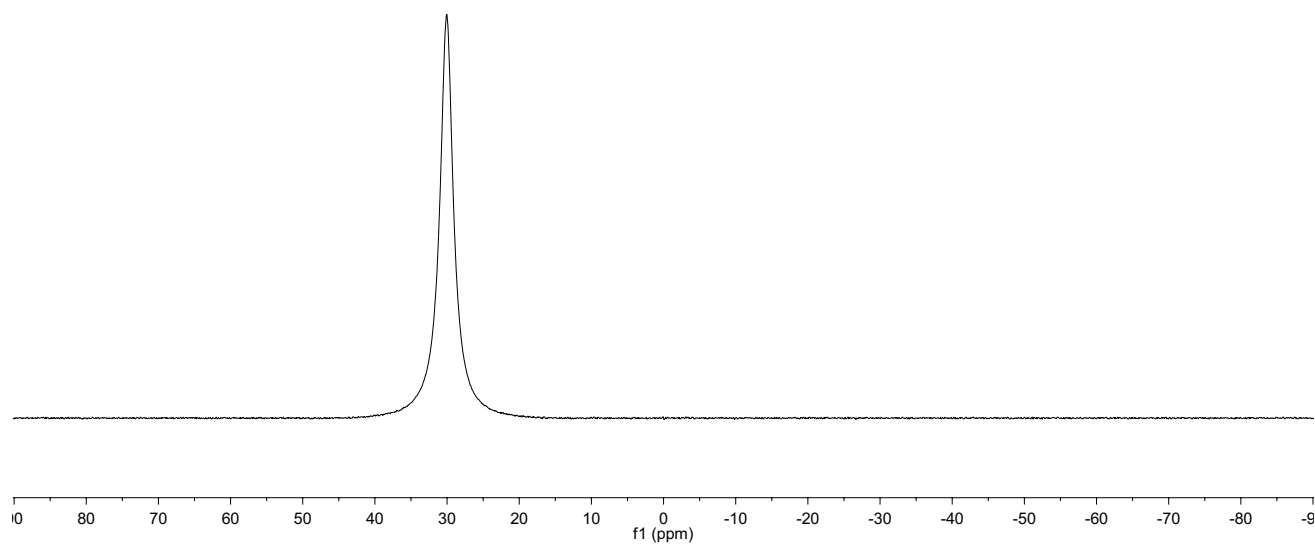

$^1\text{H}$  NMR (400 MHz,  $\text{CDCl}_3$ ) - Borylation of 2,4-dichloropyridine (**40a**)

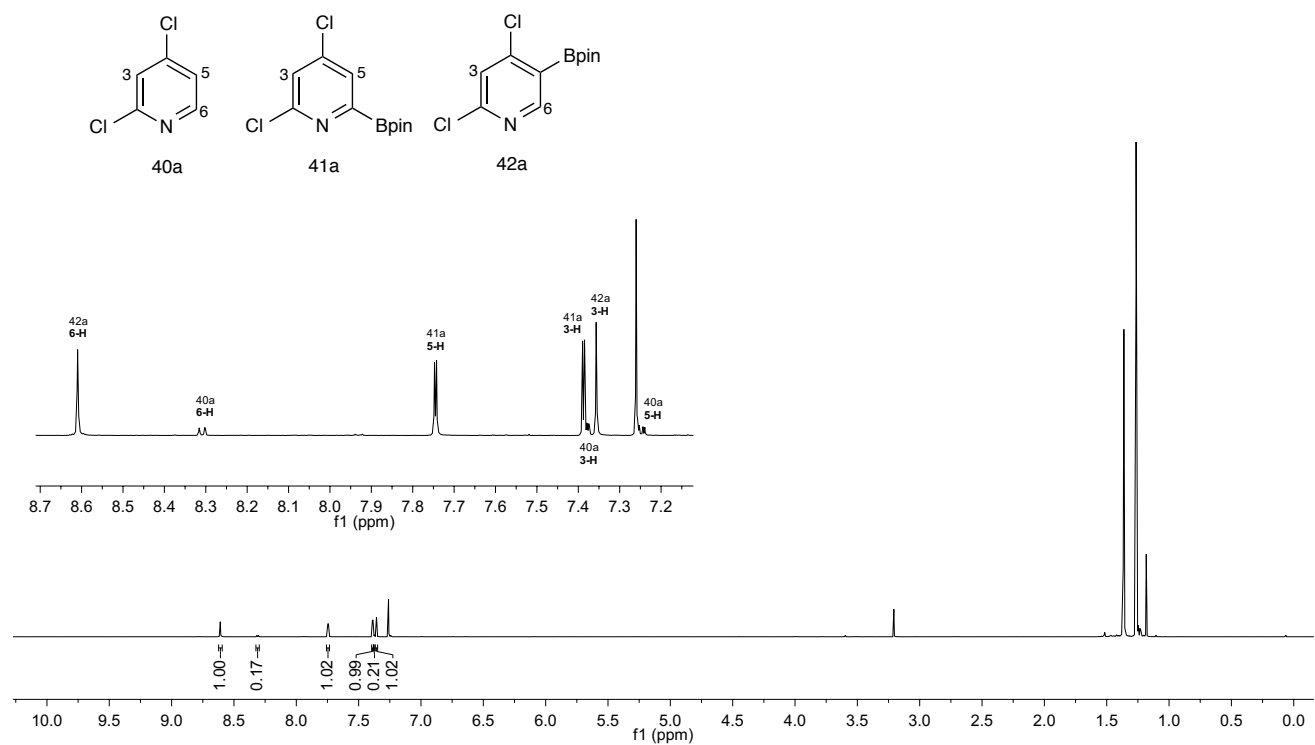

<sup>1</sup>H NMR (400 MHz, CDCl<sub>3</sub>) - Borylation of 2-chloro-4-(trifluoromethyl)pyridine (**40b**)

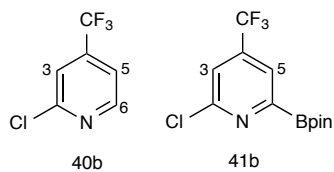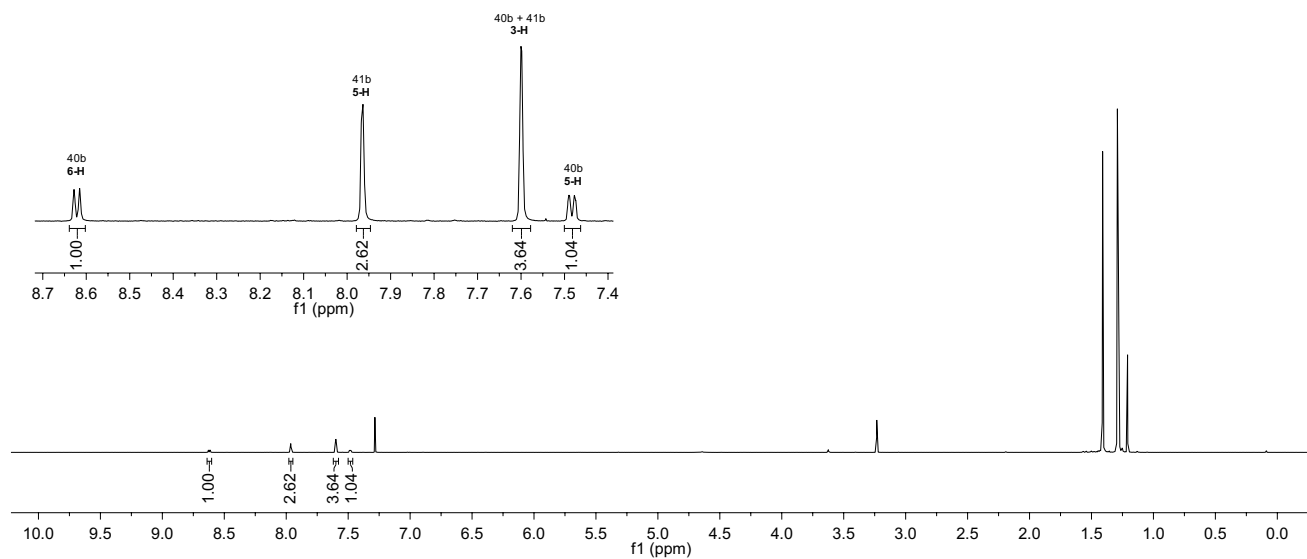

<sup>1</sup>H NMR (400 MHz, CDCl<sub>3</sub>) - Borylation of methyl-2-chloroisonicotinate (**40c**)

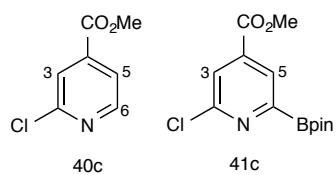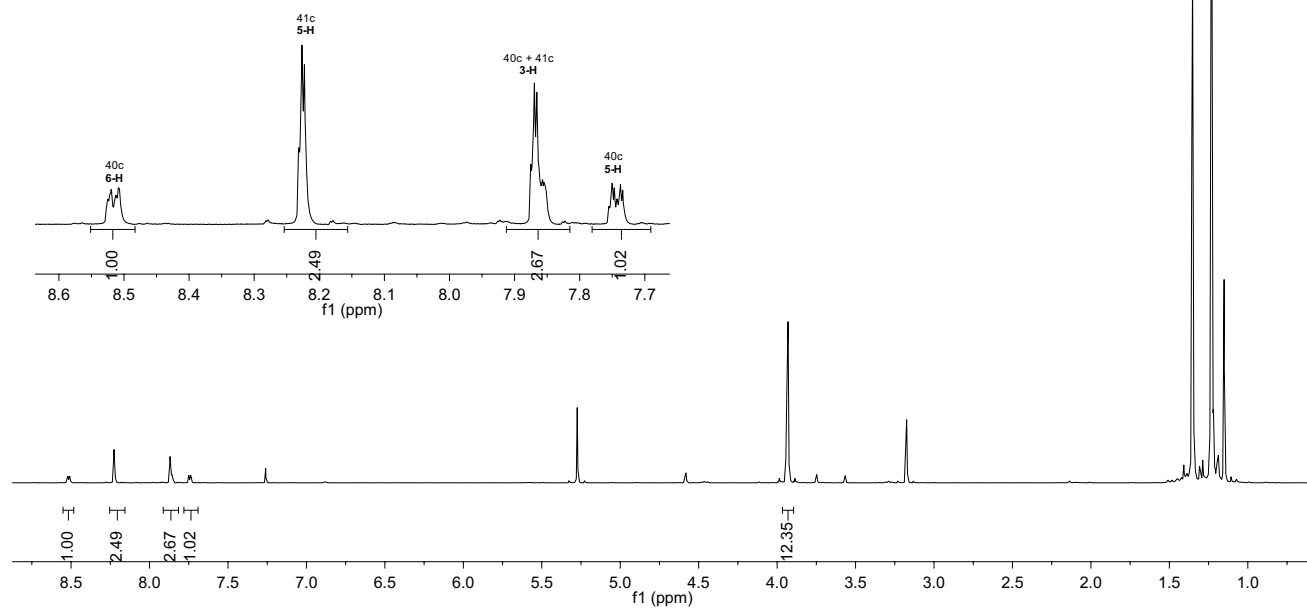

<sup>1</sup>H NMR (400 MHz, CDCl<sub>3</sub>) - Borylation of methyl-2-methoxyisonicotinate (**40d**)

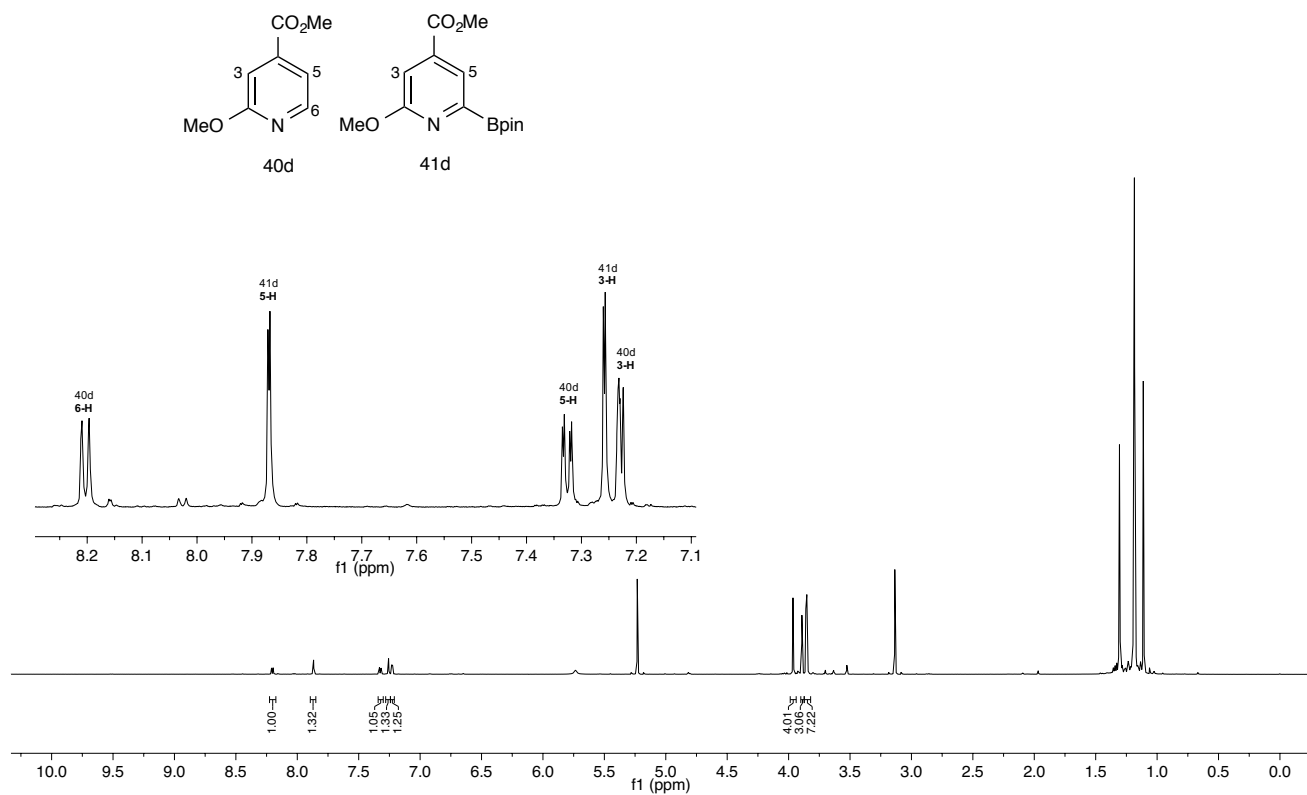

<sup>1</sup>H NMR (400 MHz, CDCl<sub>3</sub>) - Borylation of methyl-2-(trifluoromethyl)isonicotinate (**40e**)

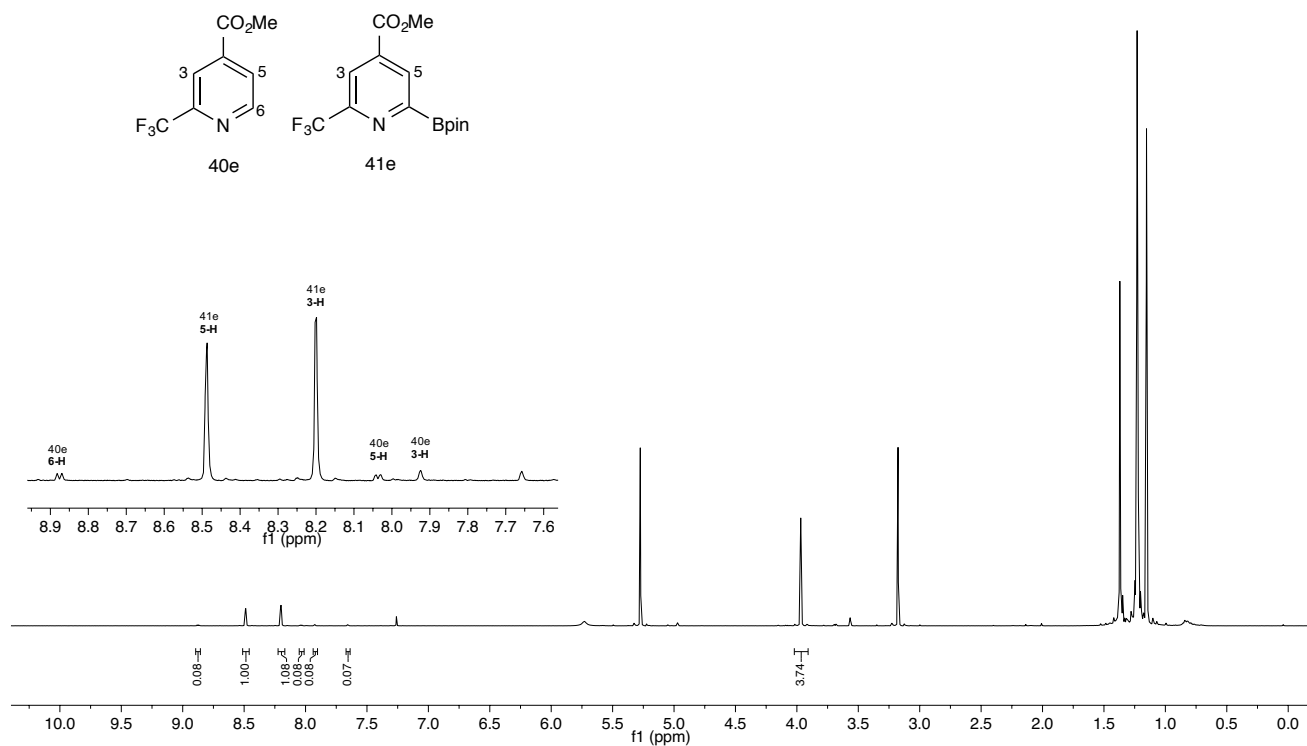



<sup>1</sup>H NMR (400 MHz, CDCl<sub>3</sub>) - Borylation of methyl-2-fluoroisonicotinate (**40f**)

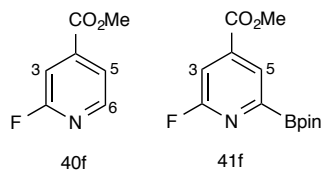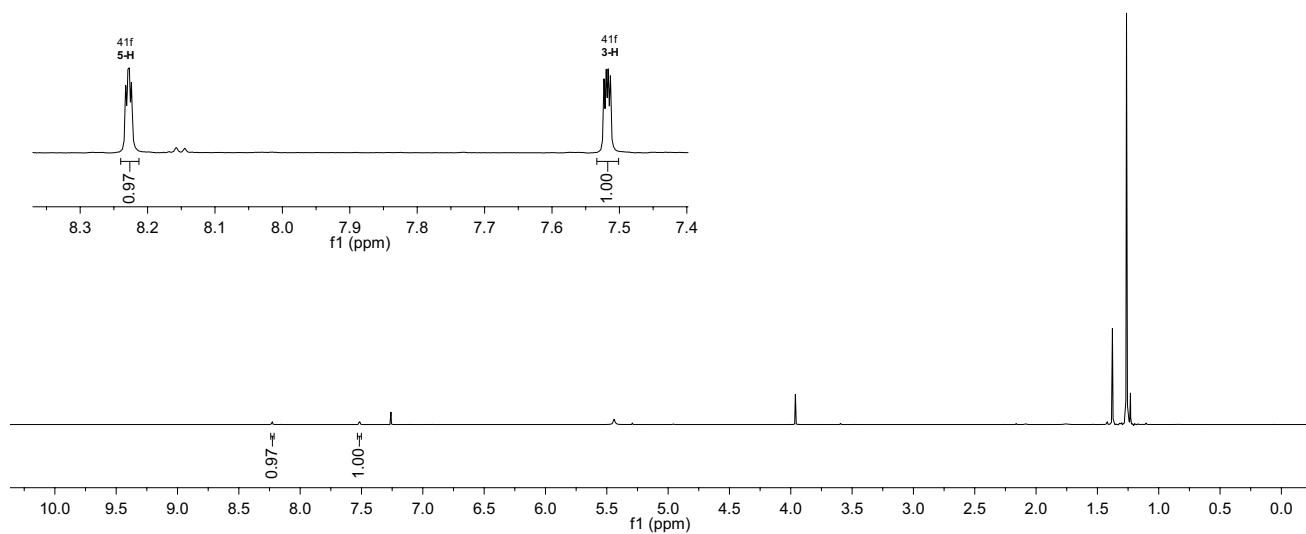

<sup>1</sup>H NMR (400 MHz, CDCl<sub>3</sub>) - Borylation of 2,4-lutidine (**40g**)

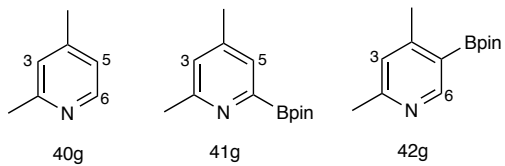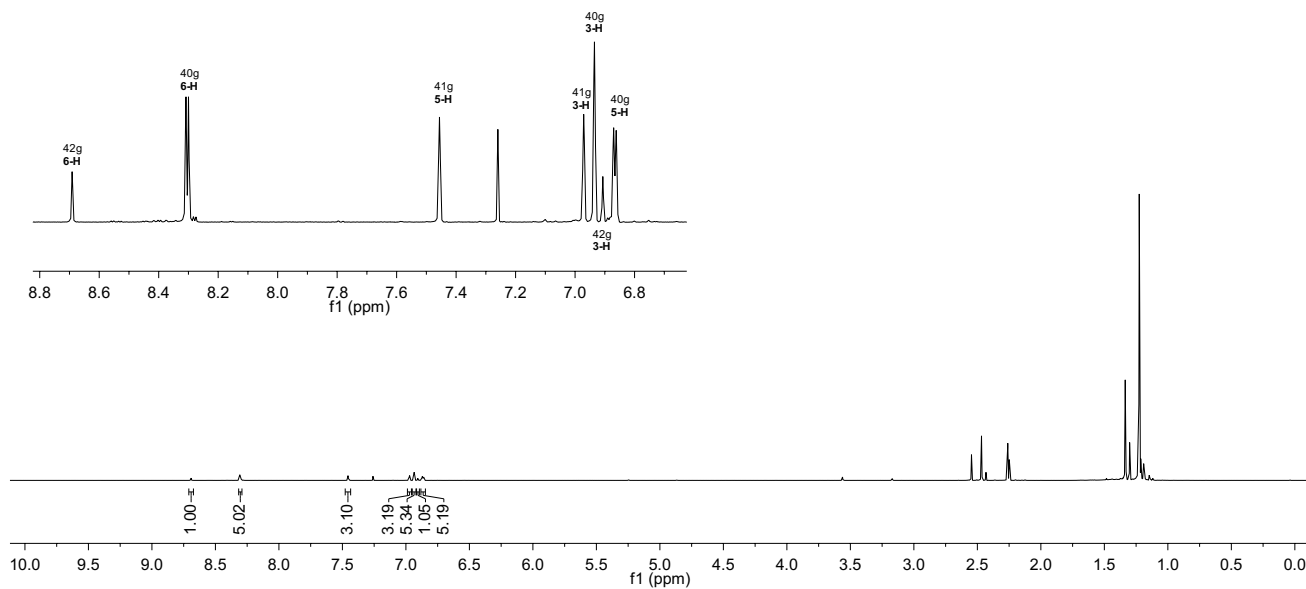

$^1\text{H}$  NMR (500 MHz,  $\text{C}_6\text{D}_6$ ) - Borylation of 4,4'-dimethoxy-2,2'-bipyridine (**40h**)

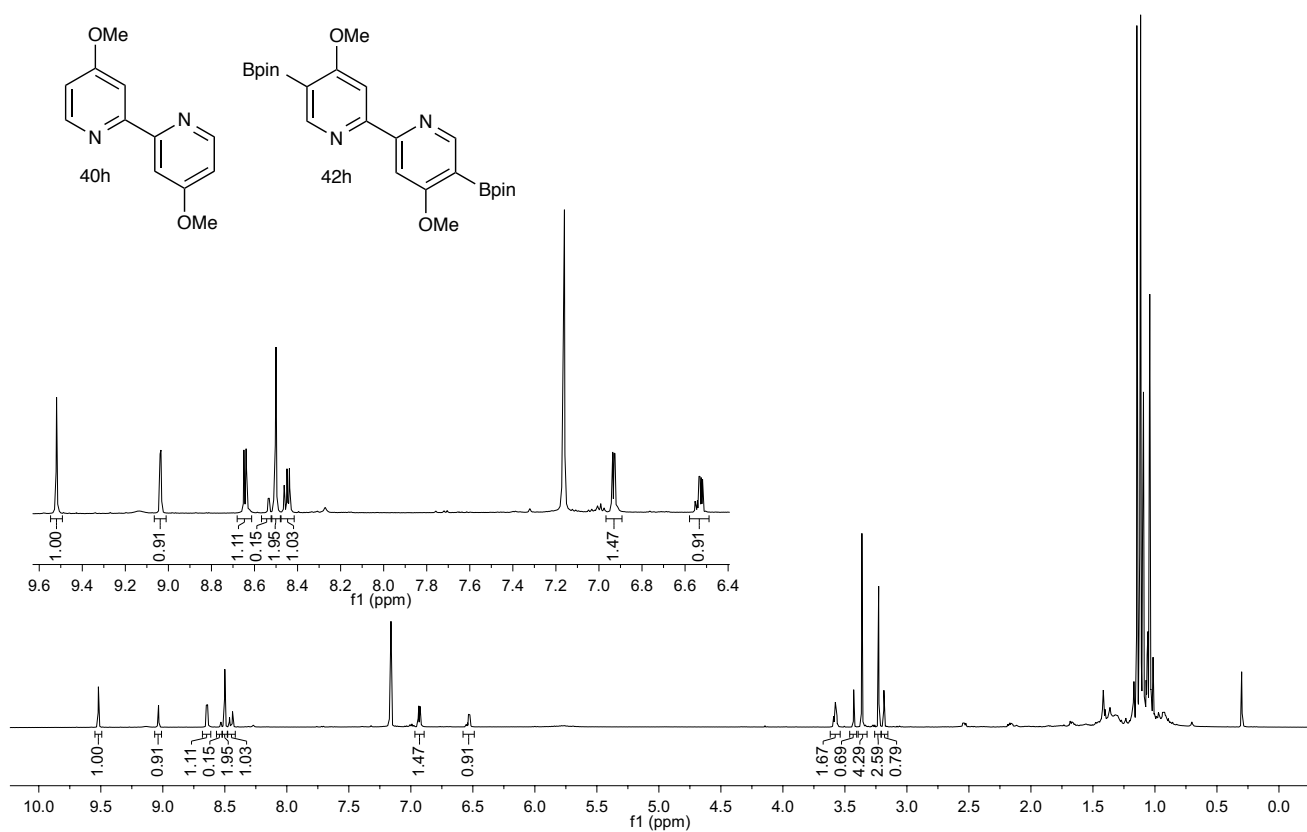

$^1\text{H}$  NMR (500 MHz,  $\text{C}_6\text{D}_6$ ) - Borylation 4,4'-di-tertbutyl-2,2'-bipyridine (**40i**)

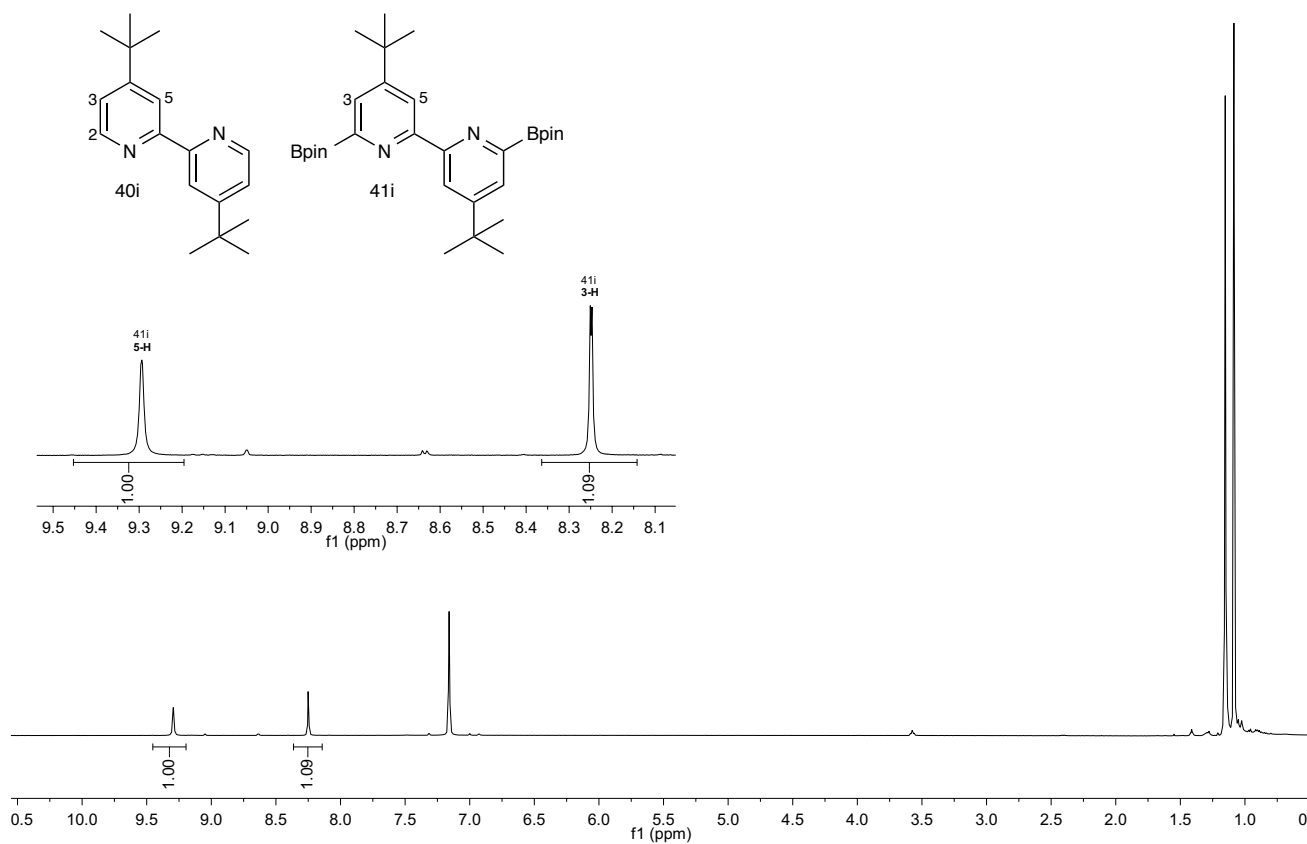

<sup>1</sup>H NMR (400 MHz, CDCl<sub>3</sub>) - Borylation of 2,5-lutidine (**43a**)

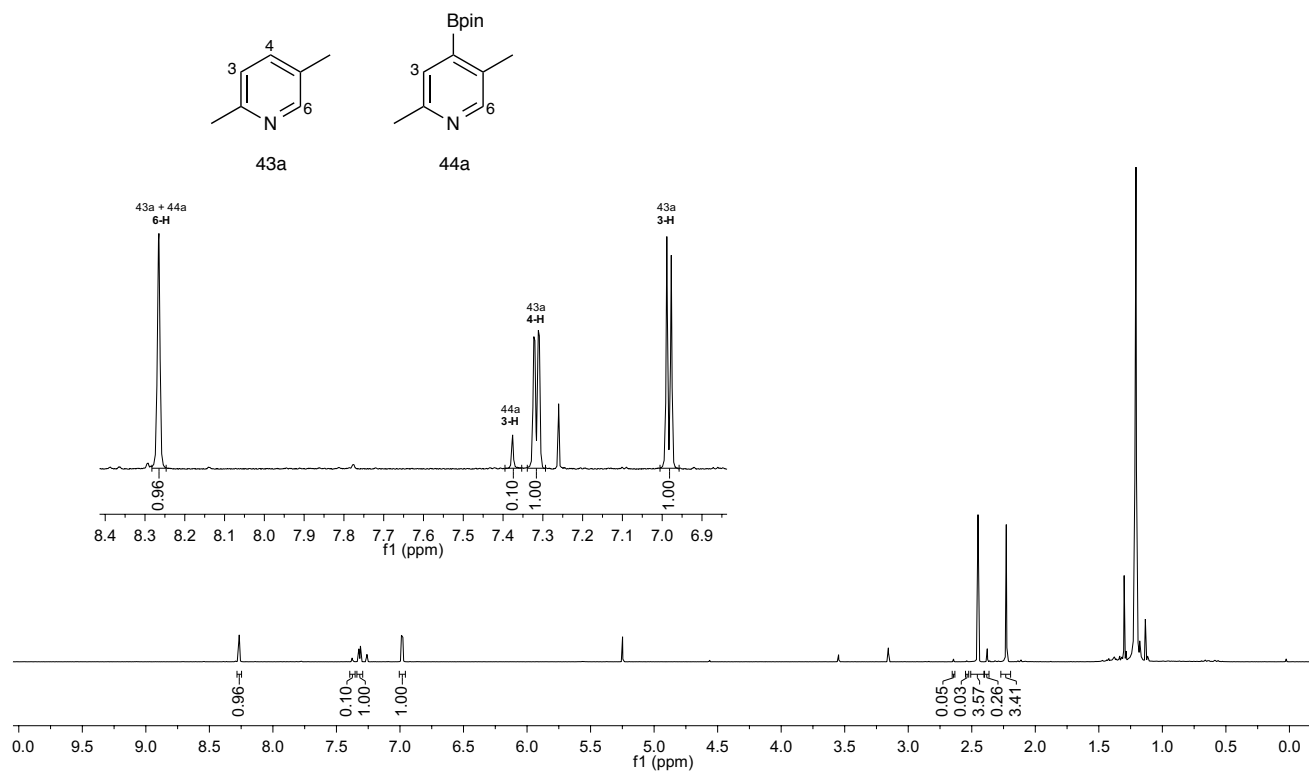

<sup>1</sup>H NMR (400 MHz, CDCl<sub>3</sub>) - Borylation of 2,5-dichloropyridine (**43b**)

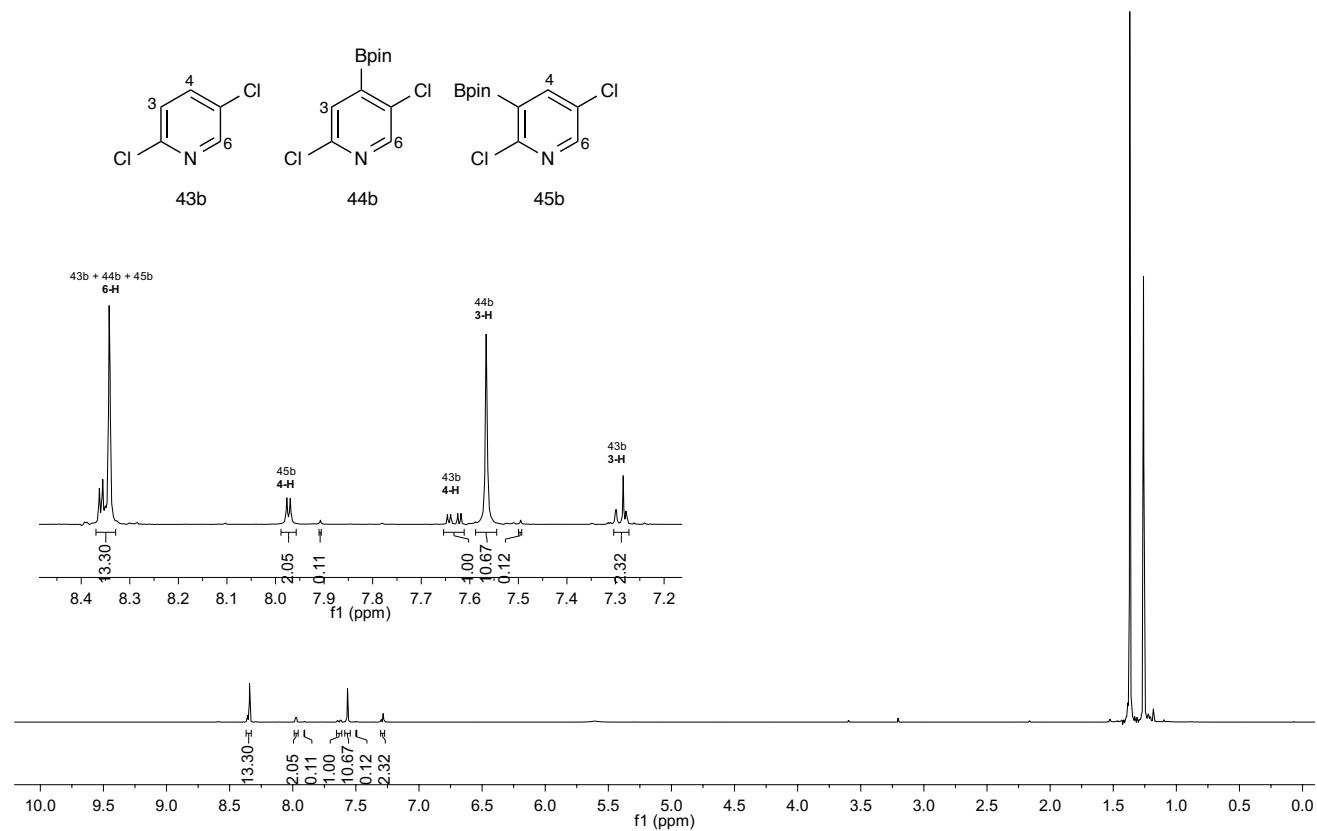

<sup>1</sup>H NMR (400 MHz, CDCl<sub>3</sub>) - Borylation of methyl-6-chloronicotinate (**43c**)

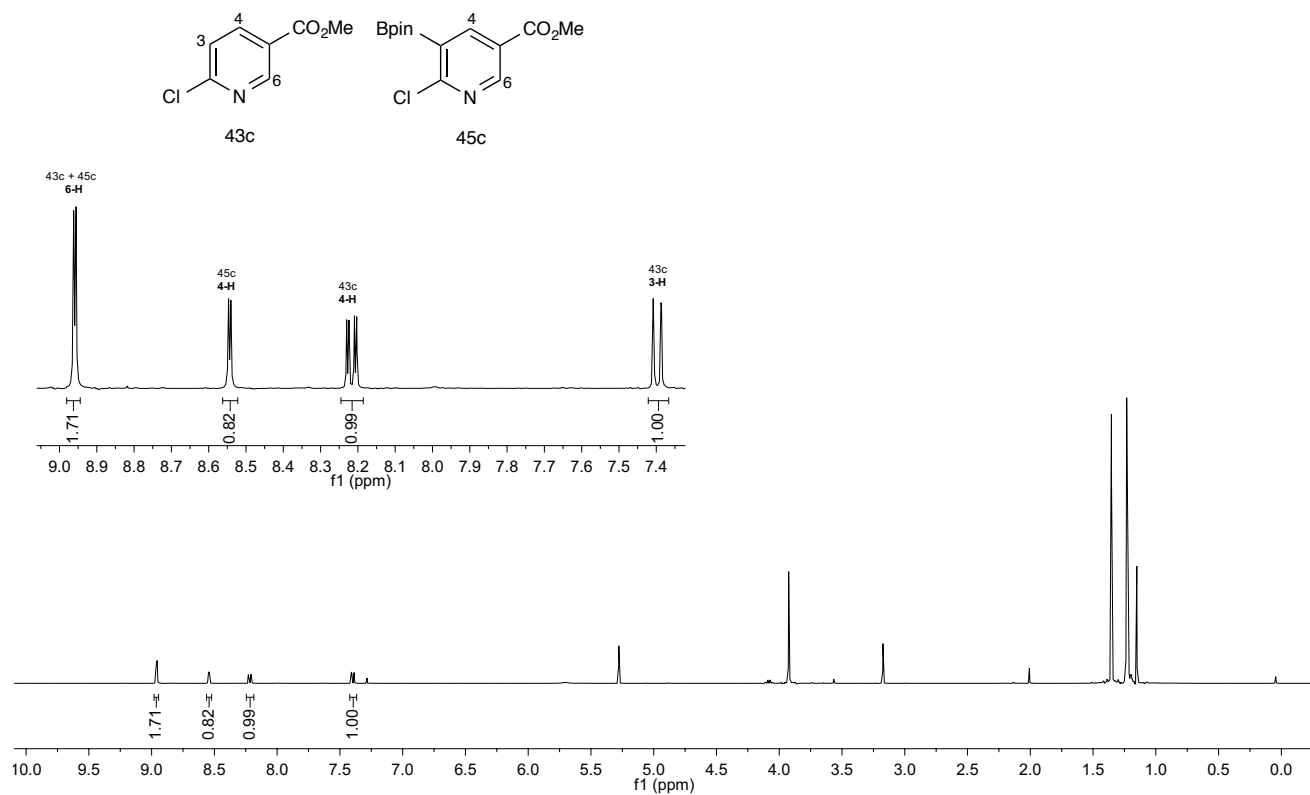

<sup>1</sup>H NMR (400 MHz, CDCl<sub>3</sub>) - Borylation of 2,5-difluoropyridine (**43d**)

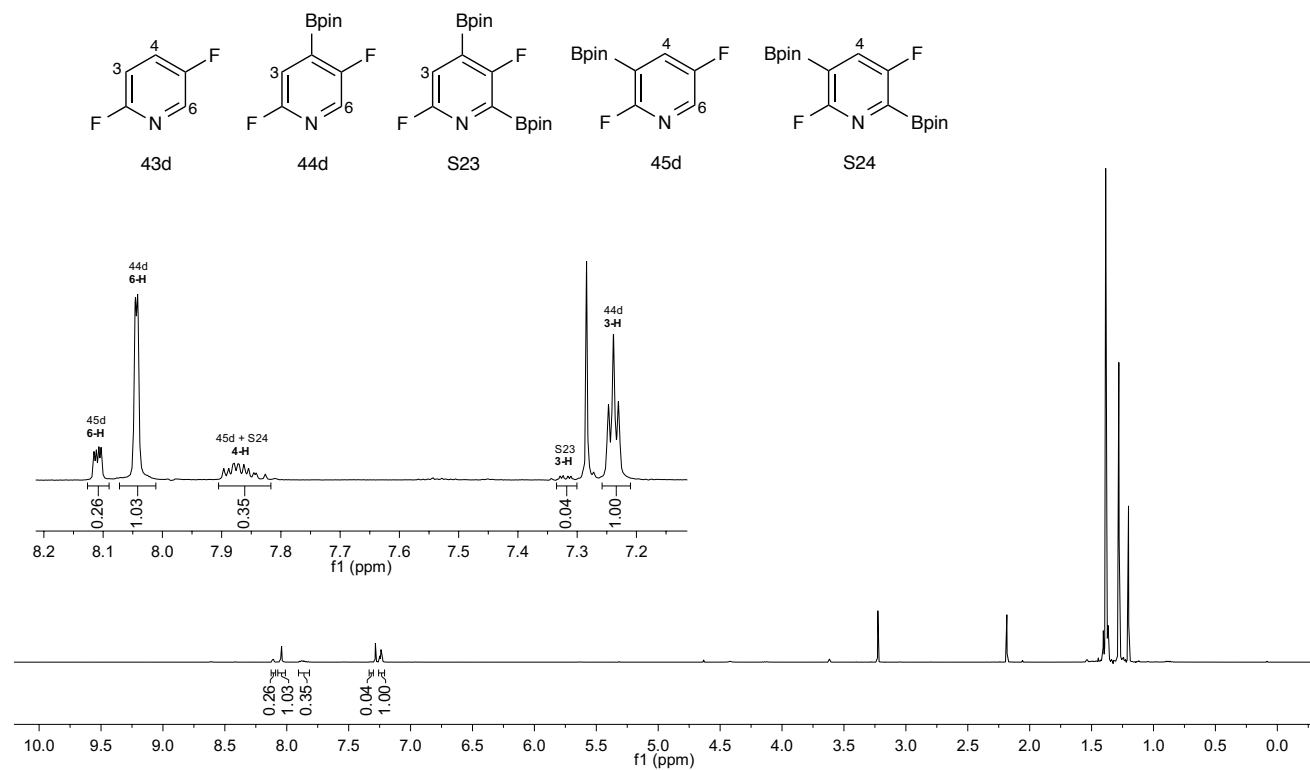

<sup>1</sup>H NMR (400 MHz, CDCl<sub>3</sub>) - Borylation of methyl-6-fluoronicotinate (**43e**)

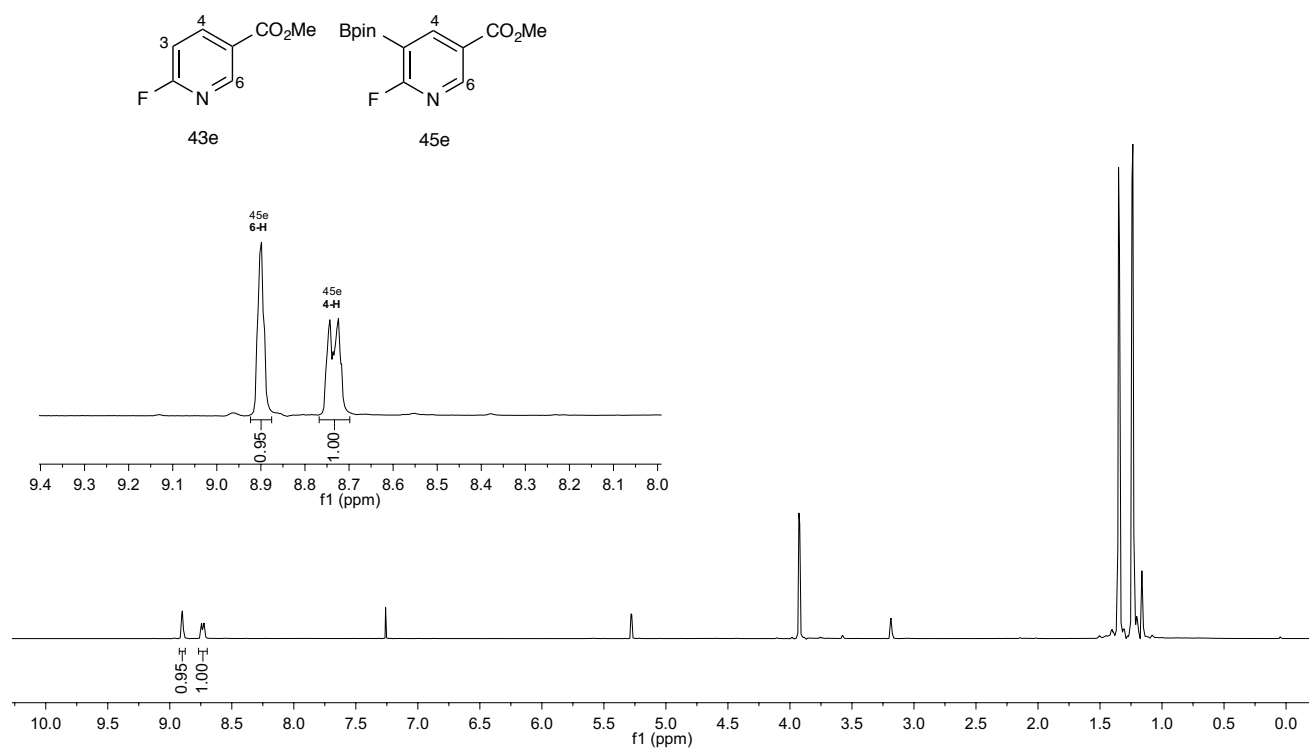

<sup>1</sup>H NMR (600 MHz, CDCl<sub>3</sub>) - methyl-5-(Bpin)-6-fluoronicotinate (Pure) (**45e**)

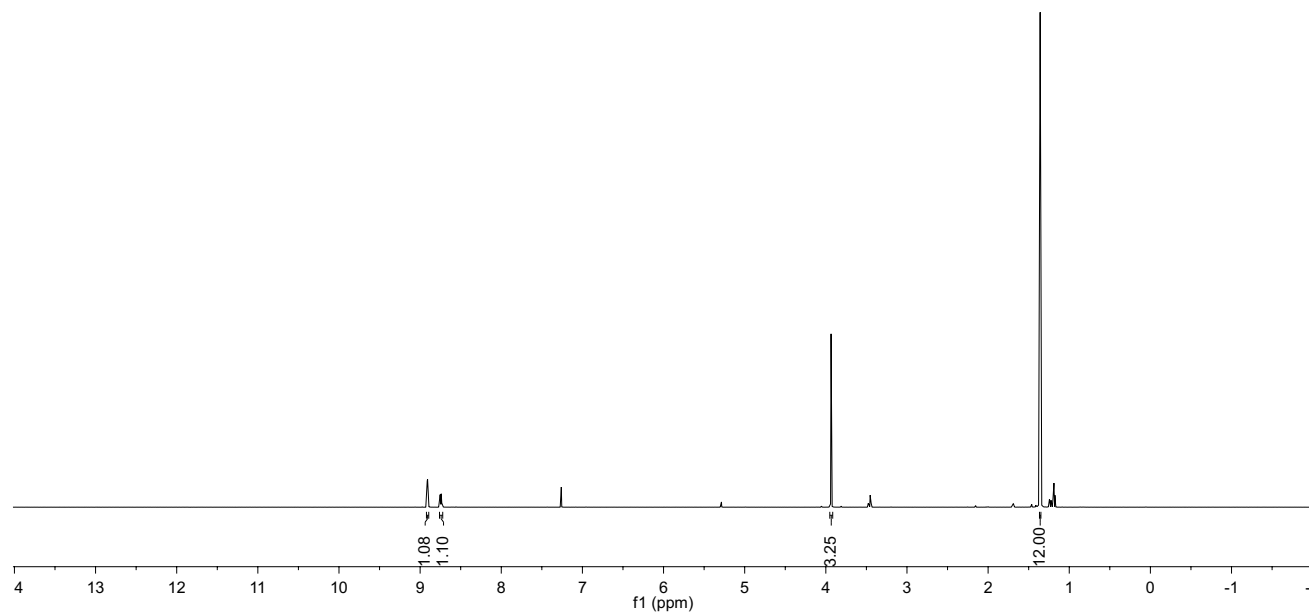

$^{13}\text{C}$  NMR (151 MHz,  $\text{CDCl}_3$ ) - methyl-5-(Bpin)-6-fluoronicotinate (Pure) (**45e**)

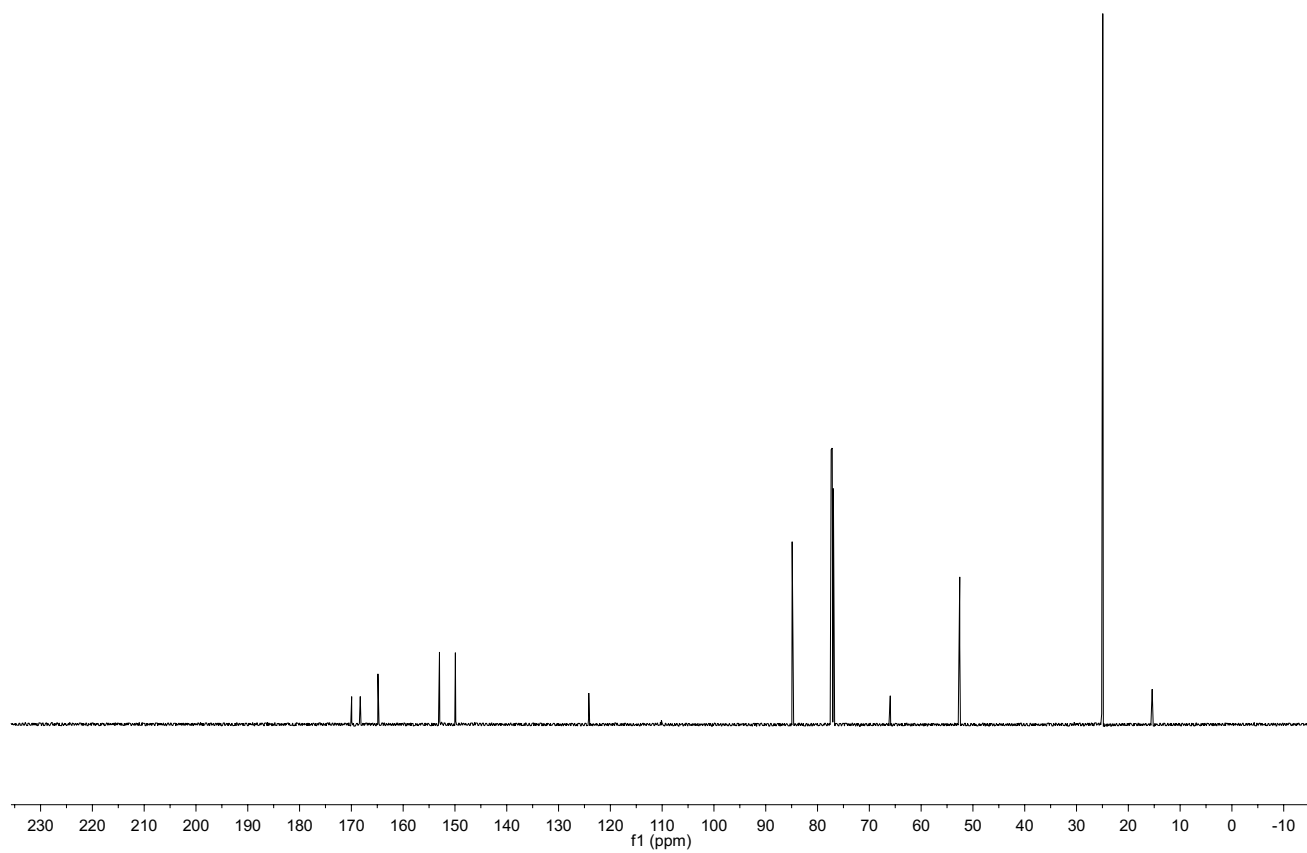

$^{19}\text{F}$  NMR (564 MHz,  $\text{CDCl}_3$ ) - methyl-5-(Bpin)-6-fluoronicotinate (Pure) (**45e**)

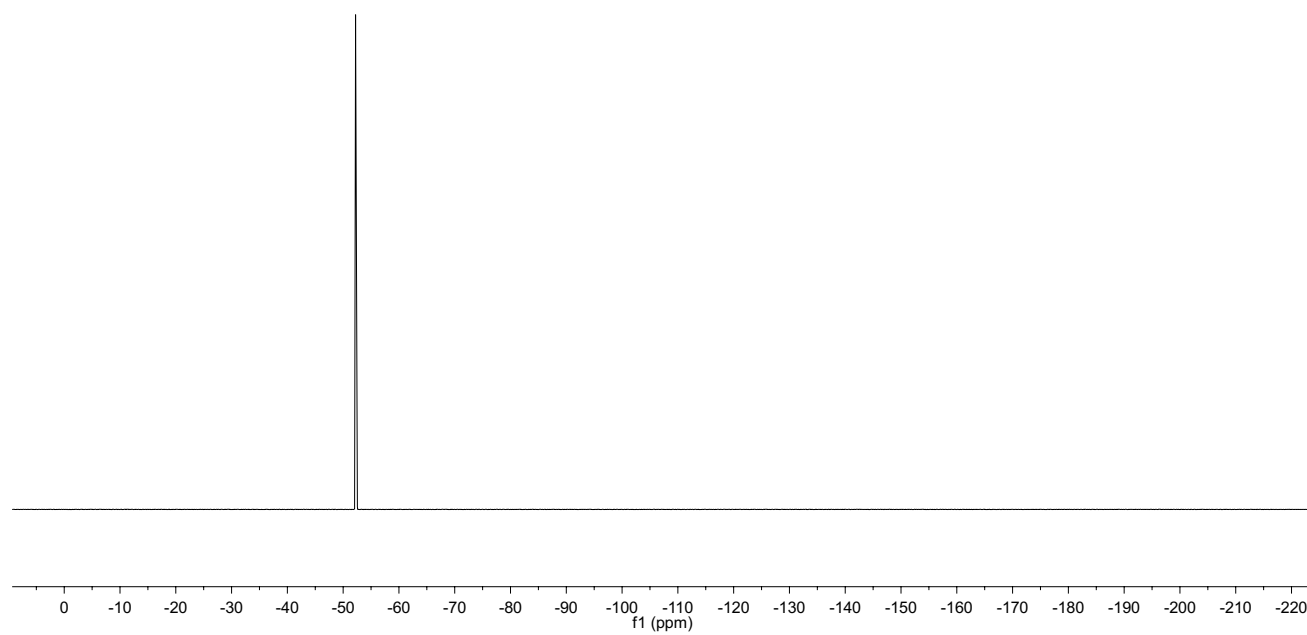

$^{11}\text{B}$  NMR (128 MHz,  $\text{CDCl}_3$ ) - methyl-5-(Bpin)-6-fluoronicotinate (Pure) (**45e**)

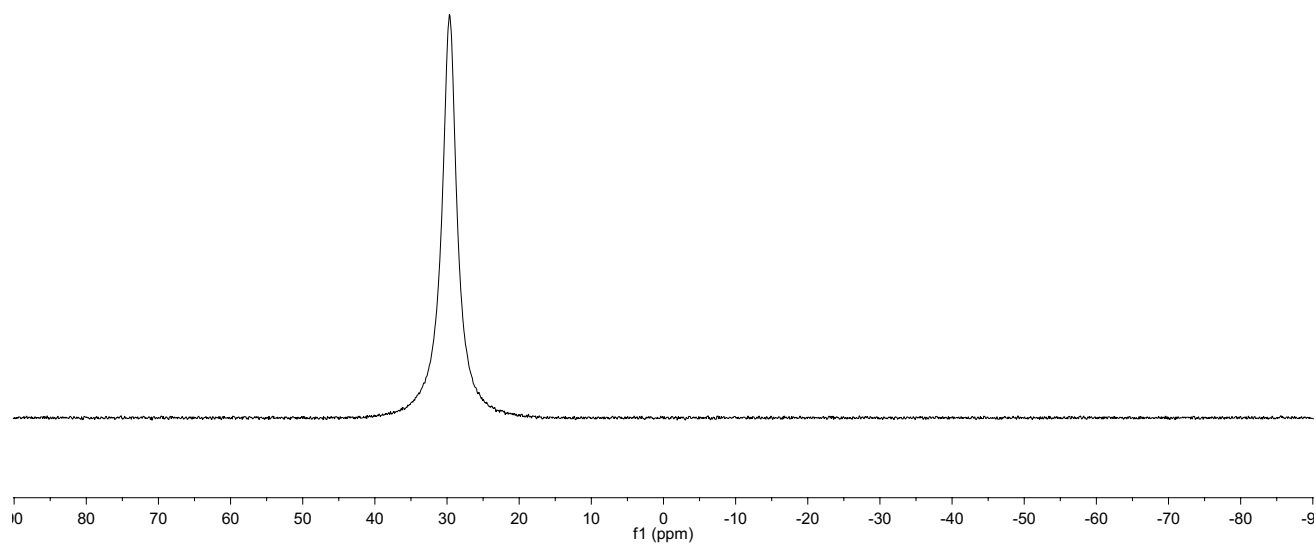

$^1\text{H}$  NMR (500 MHz,  $\text{CDCl}_3$ ) - 4,4'-di-tertbutyl-6,6'-diphenyl-2,2'-bipyridine (**46**)

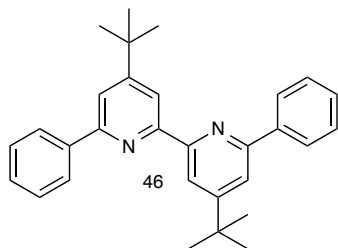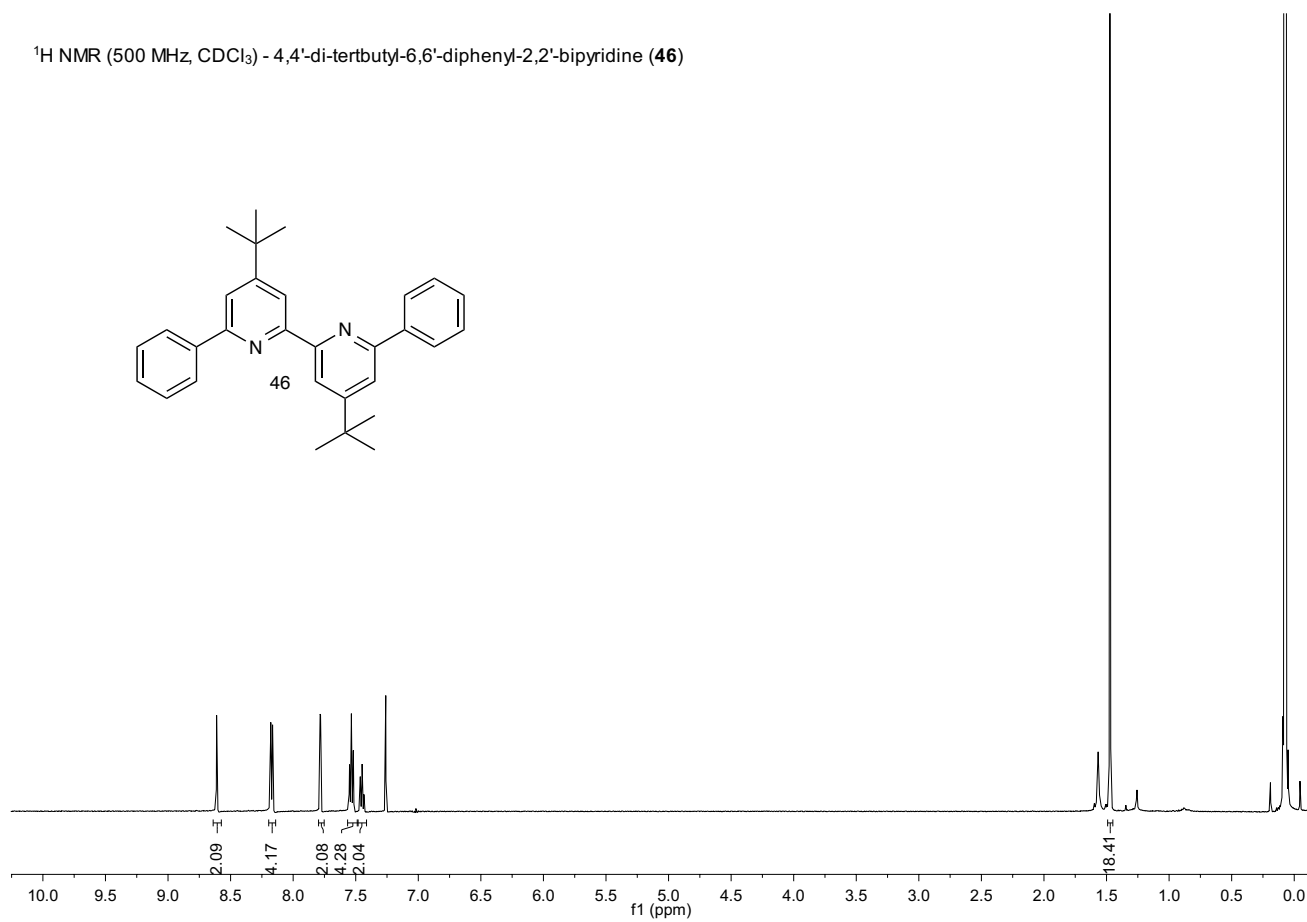

$^{13}\text{C}$  NMR (126MHz,  $\text{CDCl}_3$ ) – 4,4'-di-tertbutyl-6,6'-diphenyl-2,2'-bipyridine (**46**)

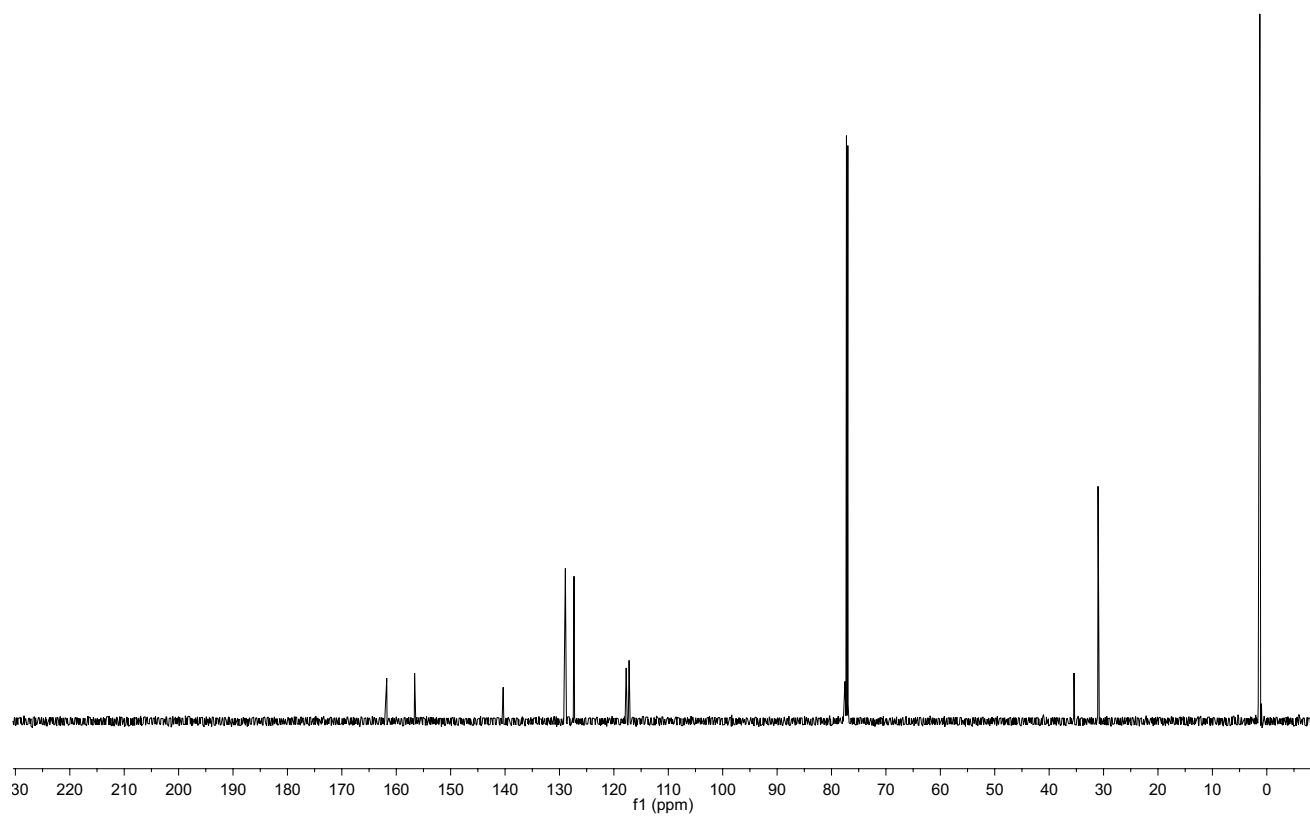

$^1\text{H}$  NMR (700 MHz,  $\text{CDCl}_3$ ) - **48**

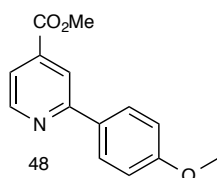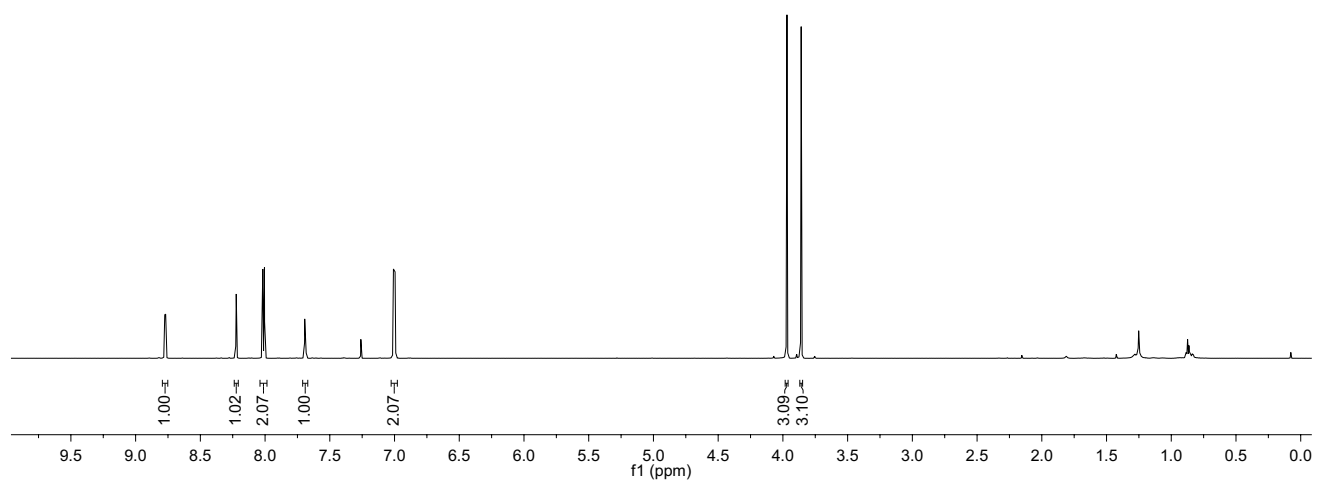



$^{13}\text{C}$  NMR (176 MHz,  $\text{CDCl}_3$ ) - 48

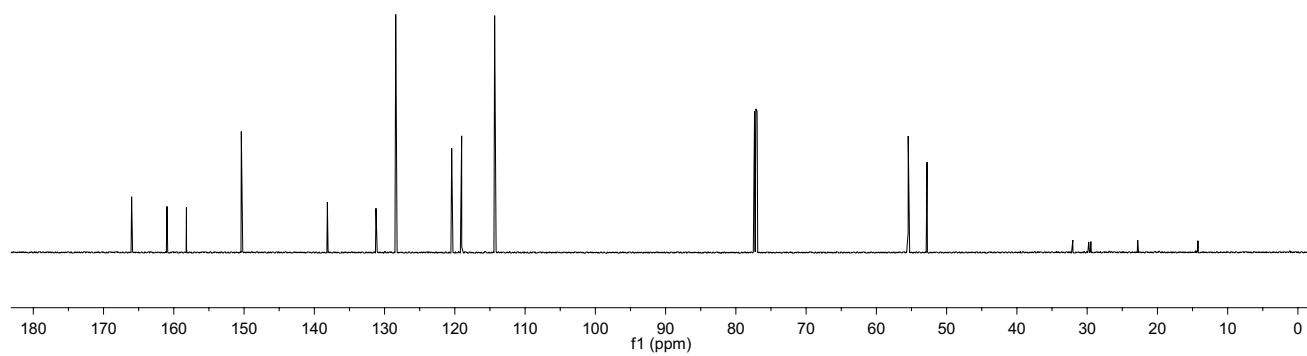

$^1\text{H}$  NMR (500MHz,  $\text{C}_6\text{D}_6$ ) - S1

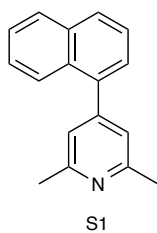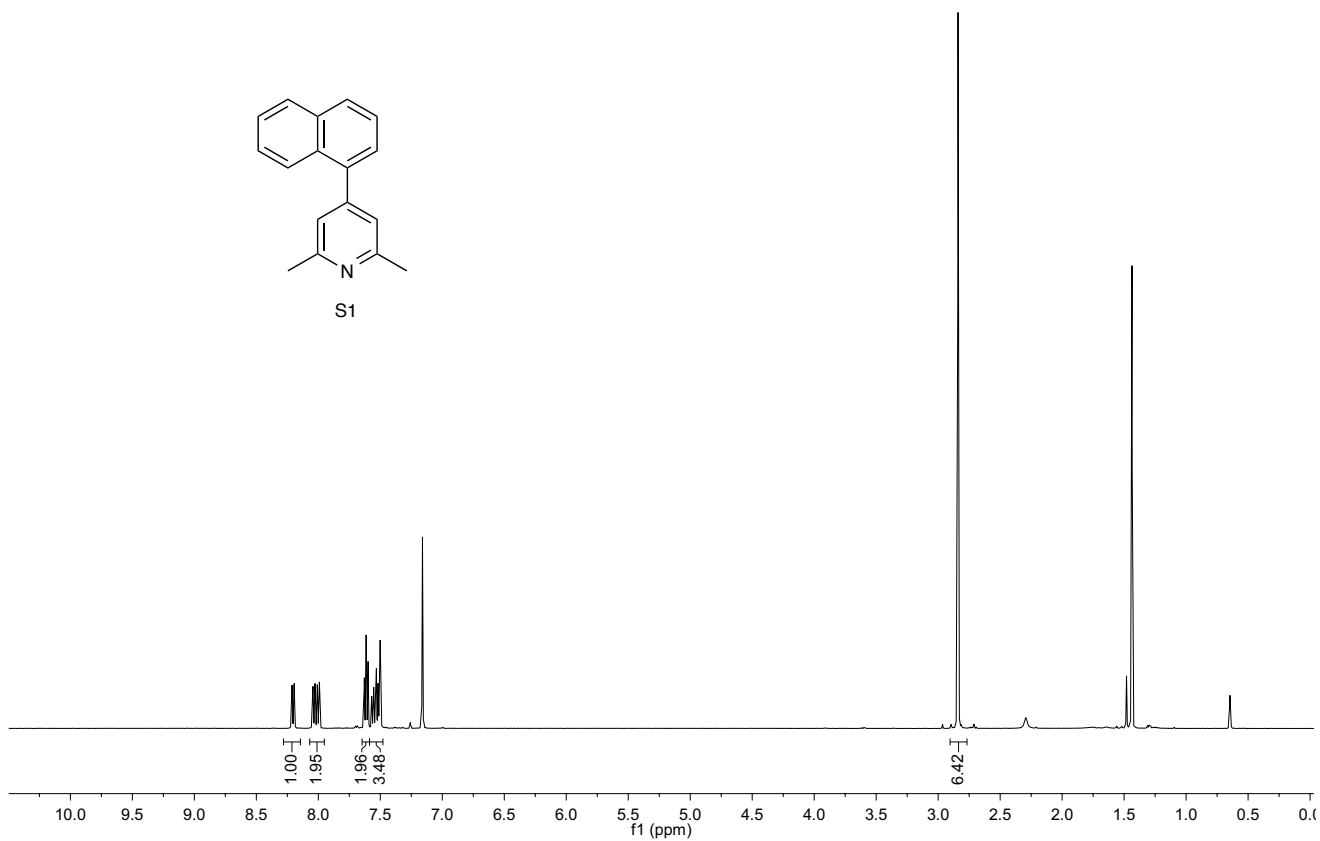

<sup>13</sup>C NMR (126MHz, C<sub>6</sub>D<sub>6</sub>) - **S1**

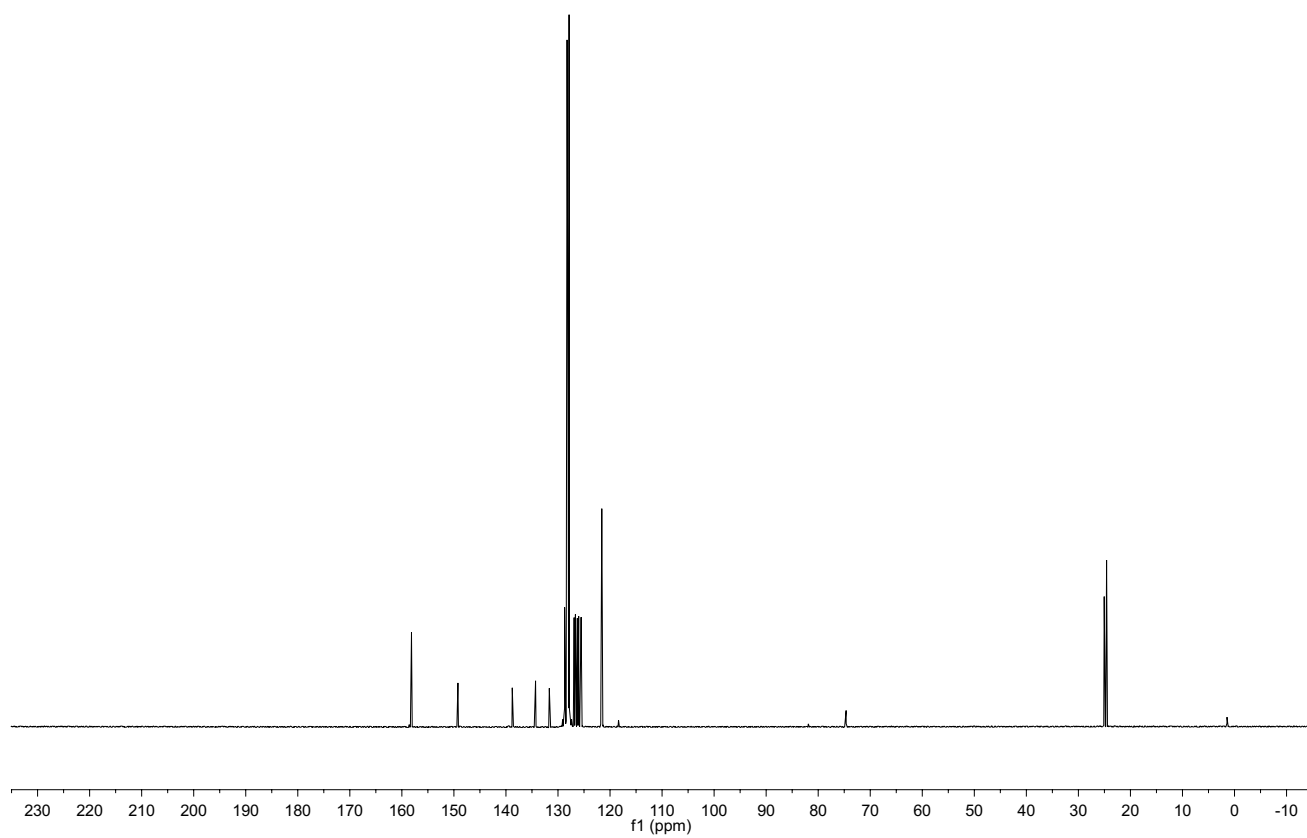

<sup>1</sup>H NMR (600 MHz, CDCl<sub>3</sub>) - **S8**

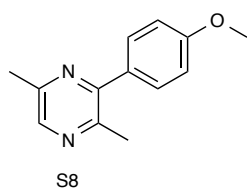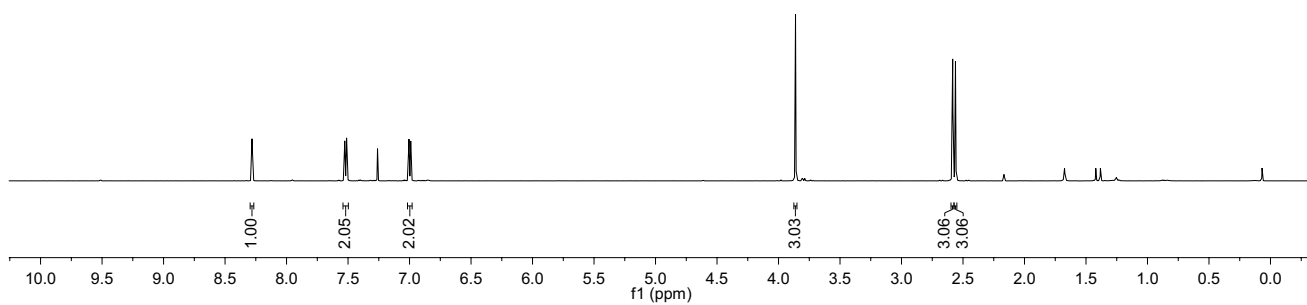

<sup>13</sup>C NMR (151 MHz, CDCl<sub>3</sub>) - **S8**

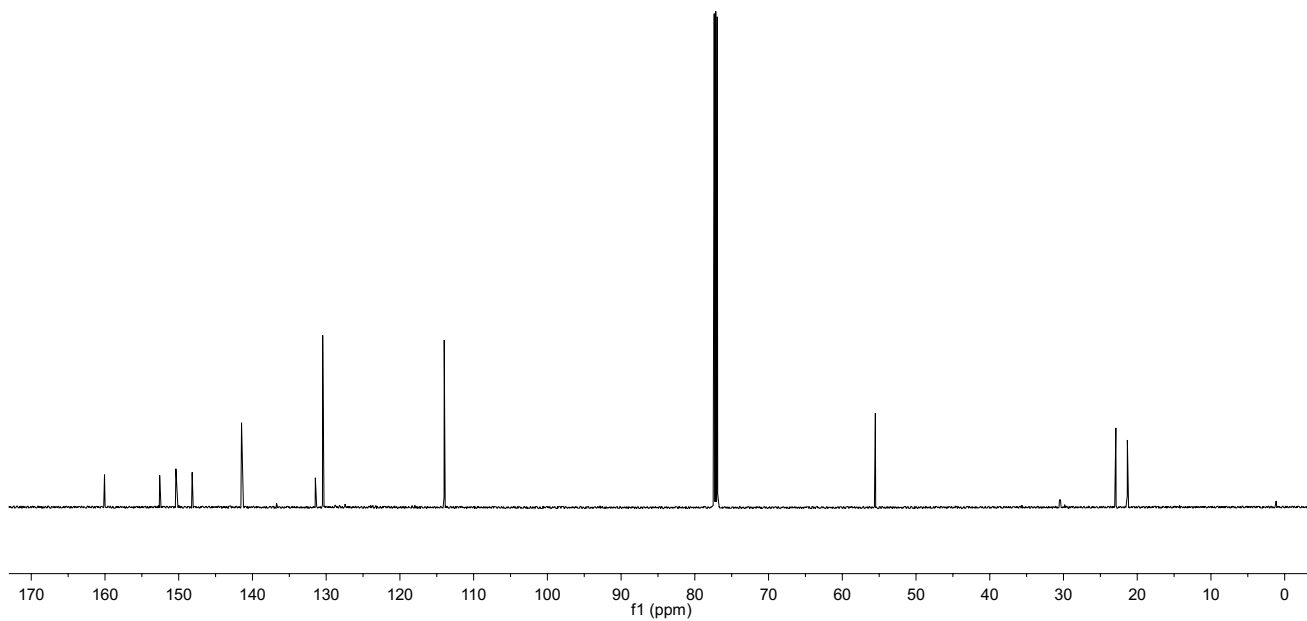

<sup>1</sup>H NMR (700 MHz, CDCl<sub>3</sub>) - **S9**

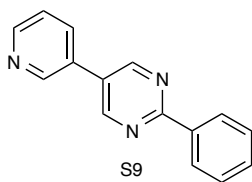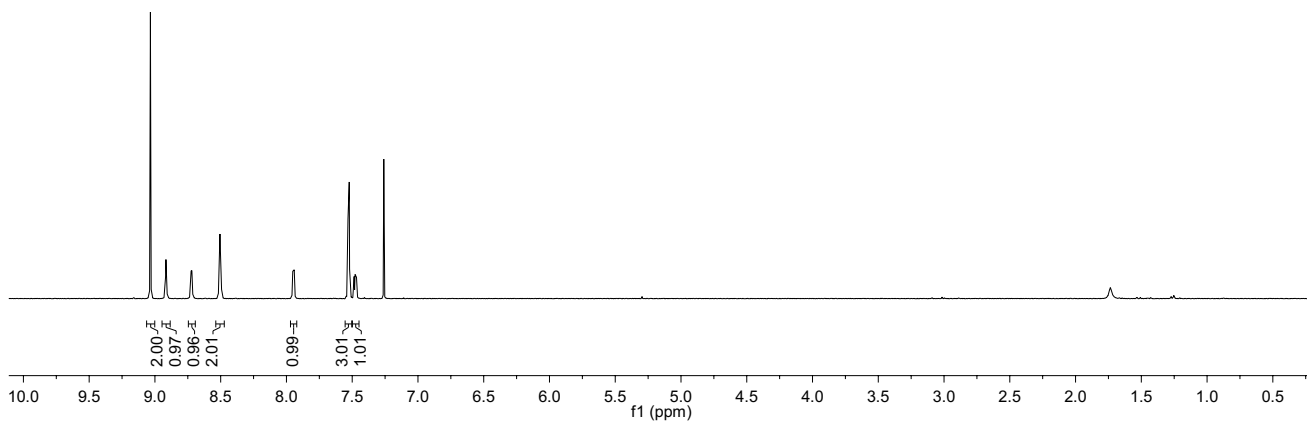

$^{13}\text{C}$  NMR (176 MHz,  $\text{CDCl}_3$ ) - **S9**

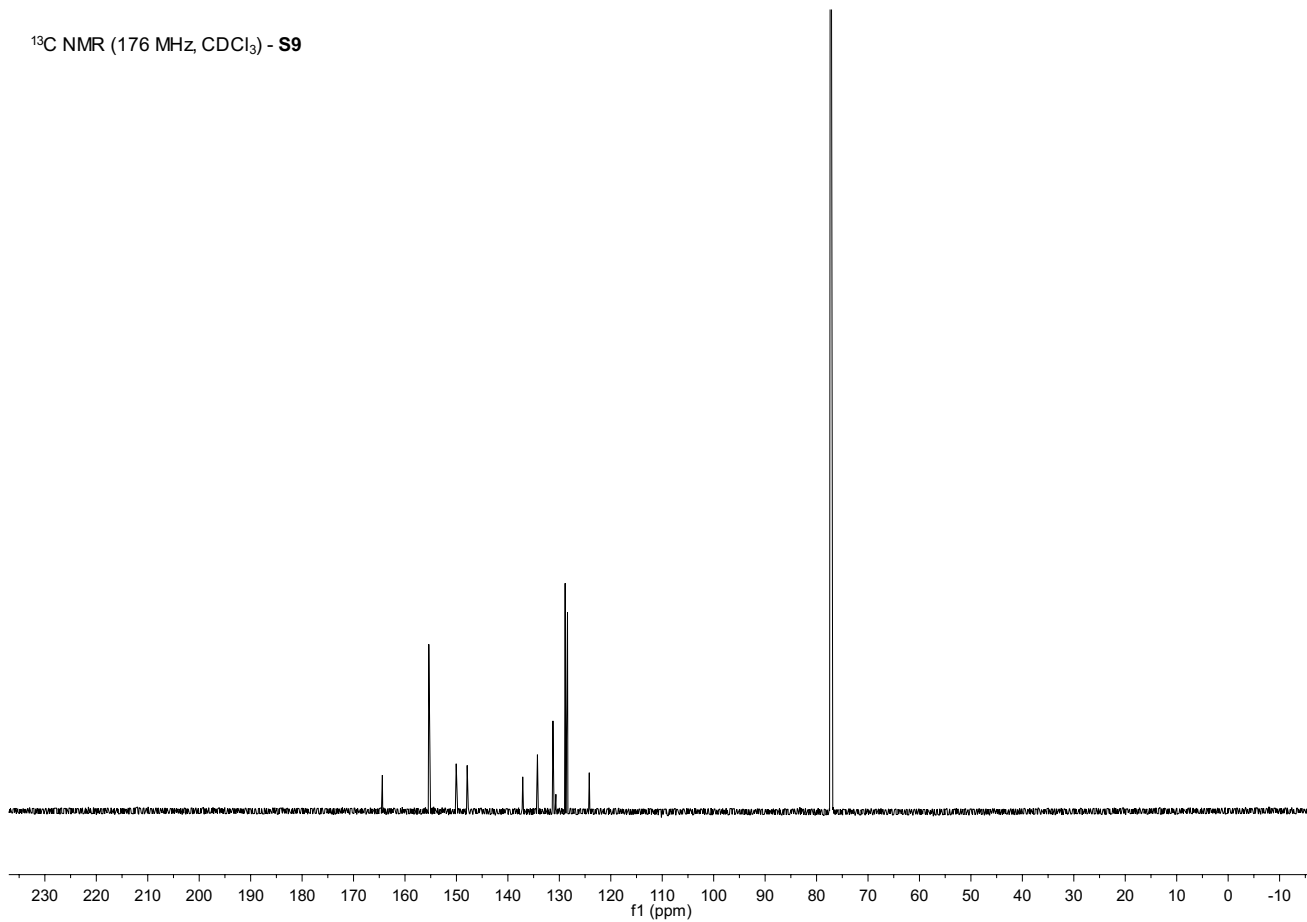

$^1\text{H}$  NMR (700 MHz,  $\text{CDCl}_3$ ) - **S10**

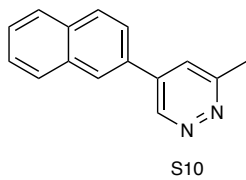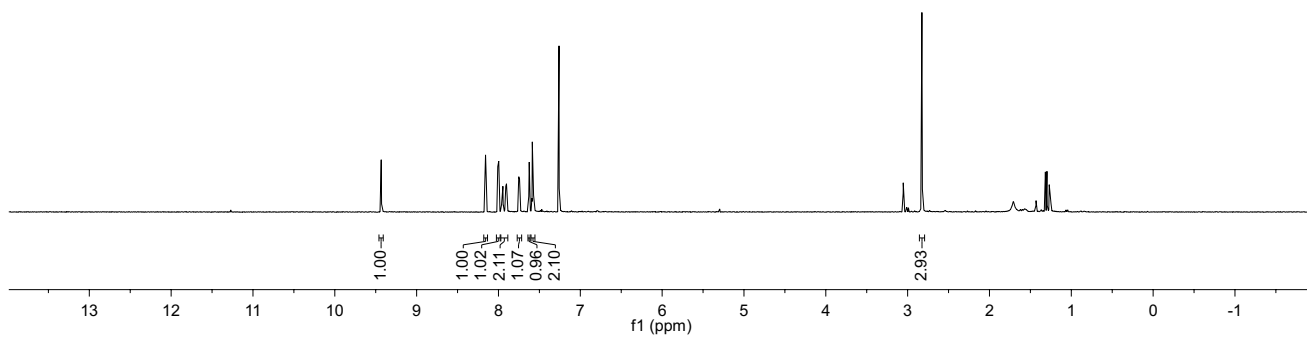

$^{13}\text{C}$  NMR (176 MHz,  $\text{CDCl}_3$ ) - **S10**

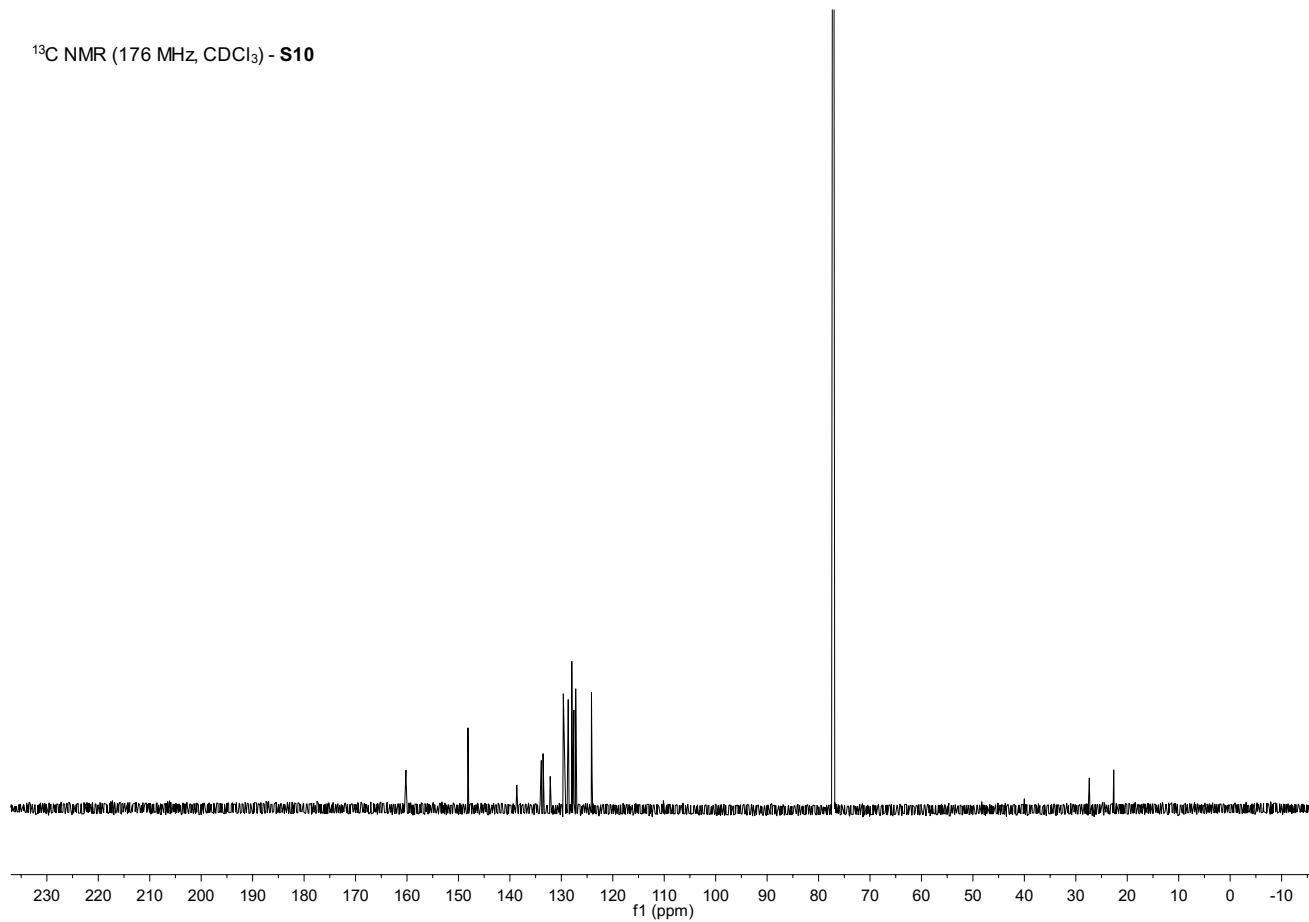

$^1\text{H}$  NMR (700 MHz,  $\text{CDCl}_3$ ) - **S12**

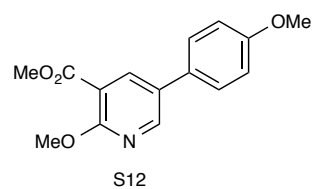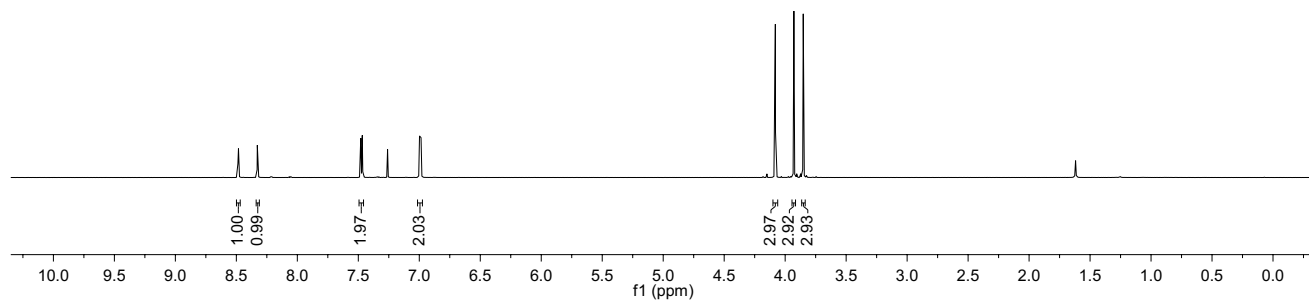

$^{13}\text{C}$  NMR (176 MHz,  $\text{CDCl}_3$ ) - **S12**

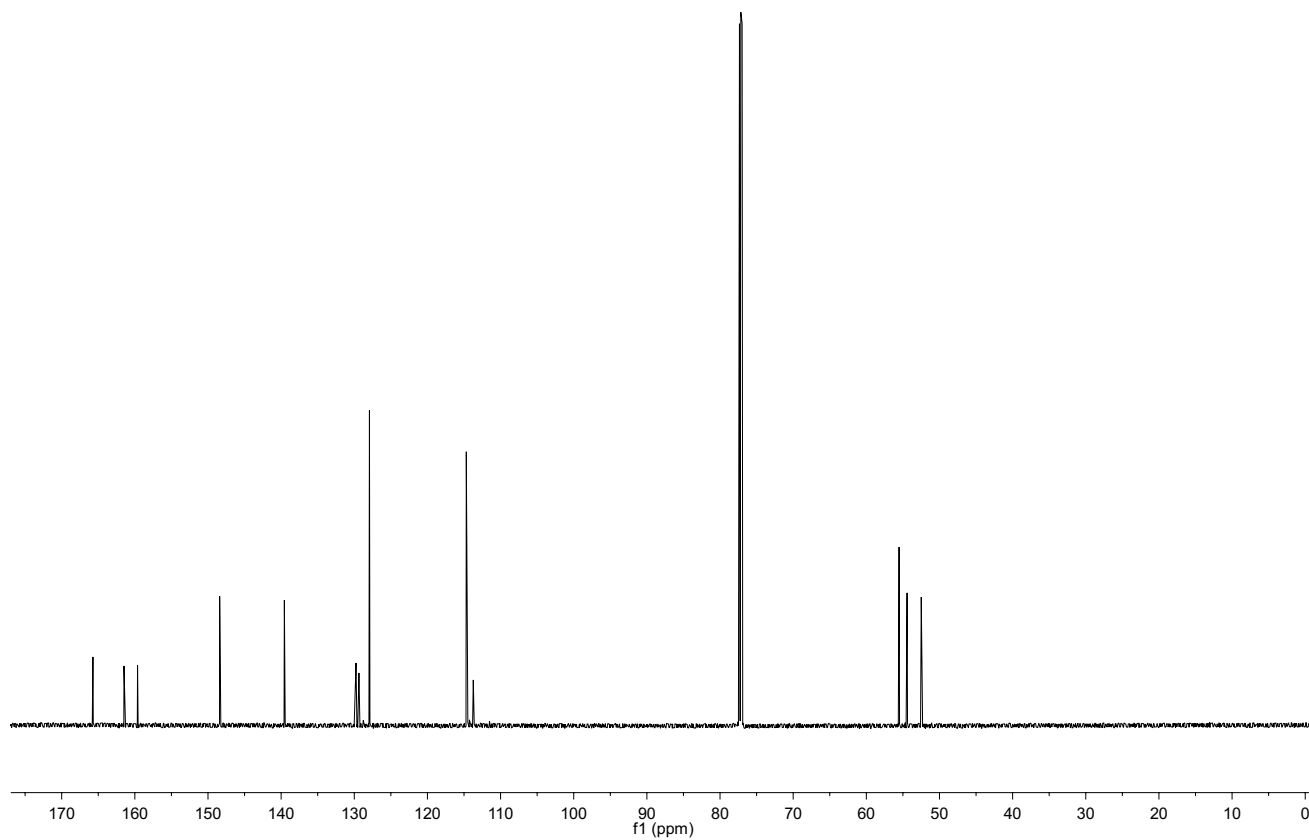

$^1\text{H}$  NMR (700 MHz,  $\text{CDCl}_3$ ) - **S13**

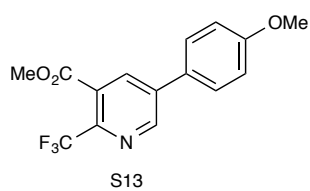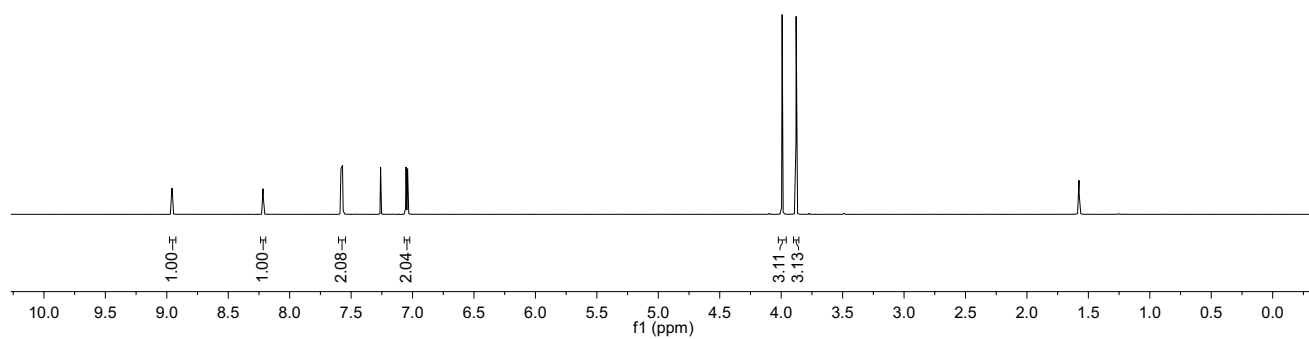

$^{13}\text{C}$  NMR (176 MHz,  $\text{CDCl}_3$ ) - S13

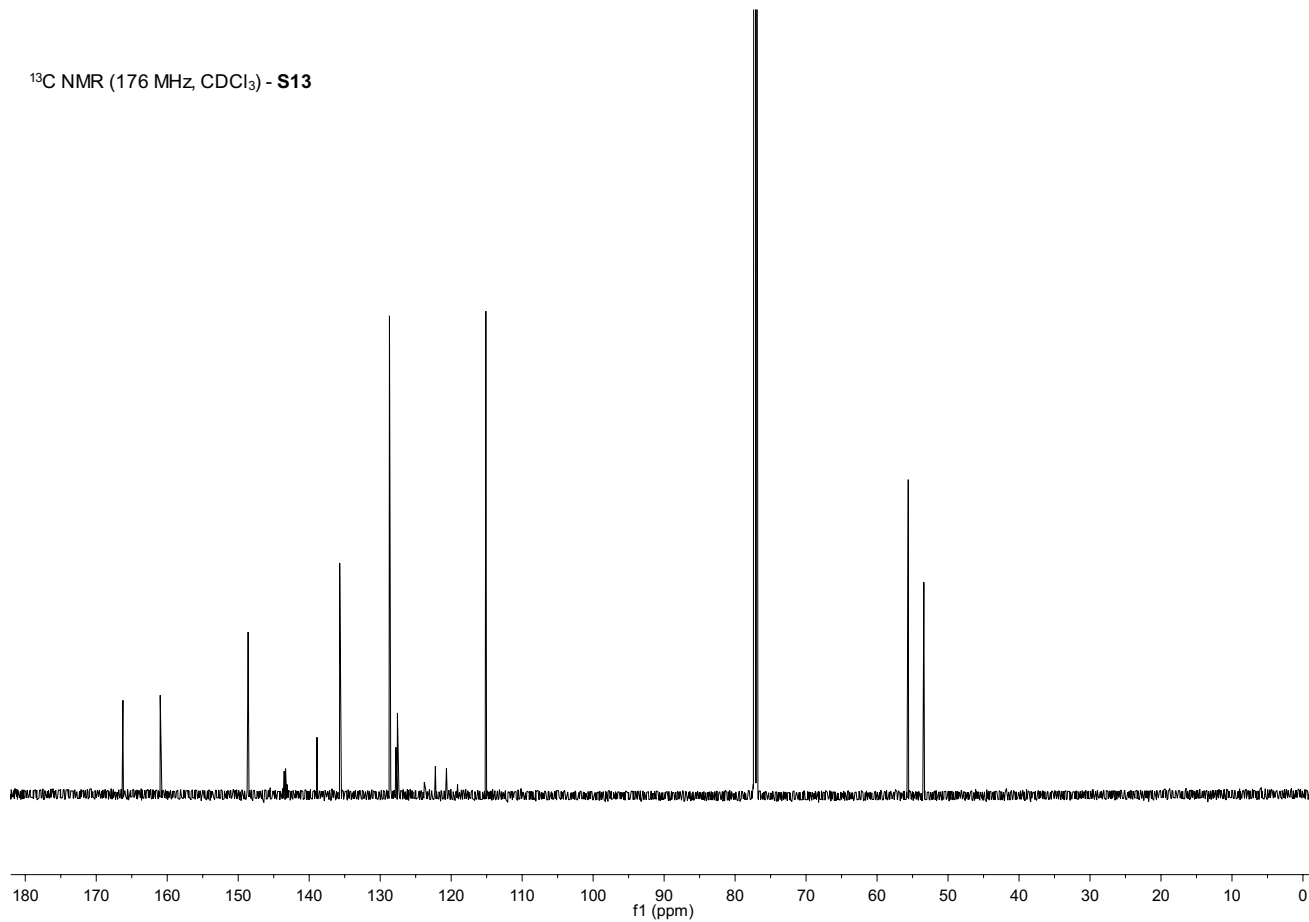

$^{19}\text{F}$  NMR (376 MHz,  $\text{CDCl}_3$ ) - S13

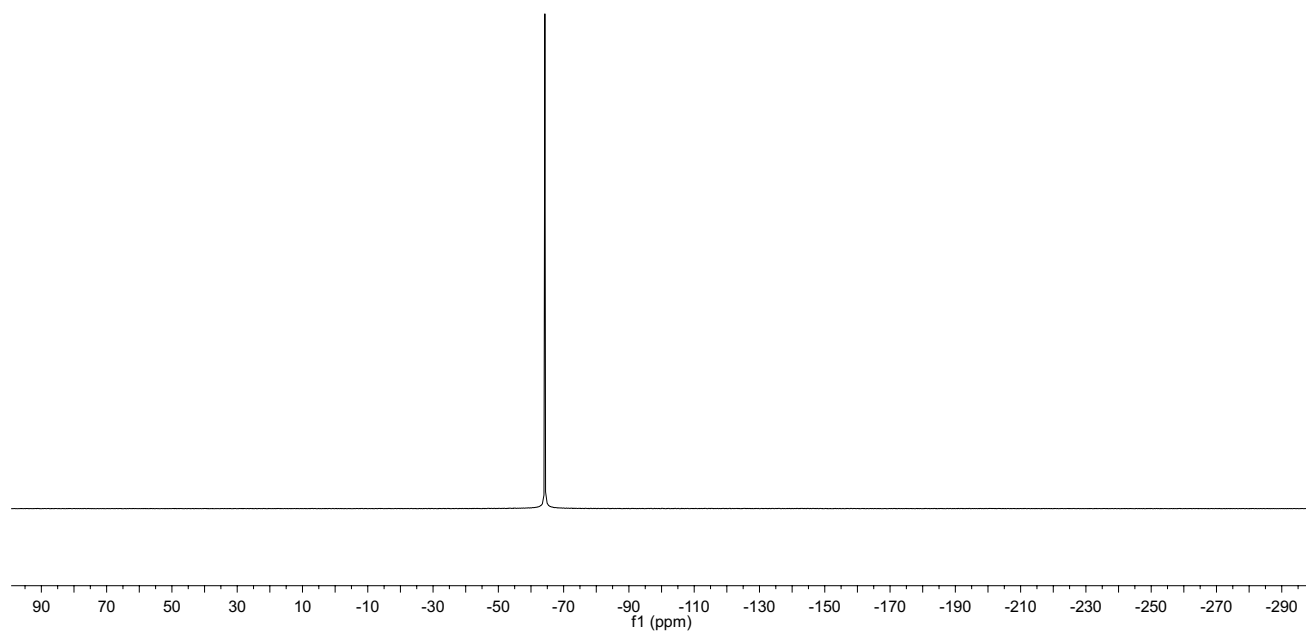

<sup>1</sup>H NMR (700 MHz, CDCl<sub>3</sub>) - **S14**

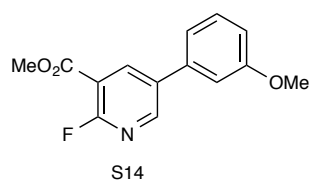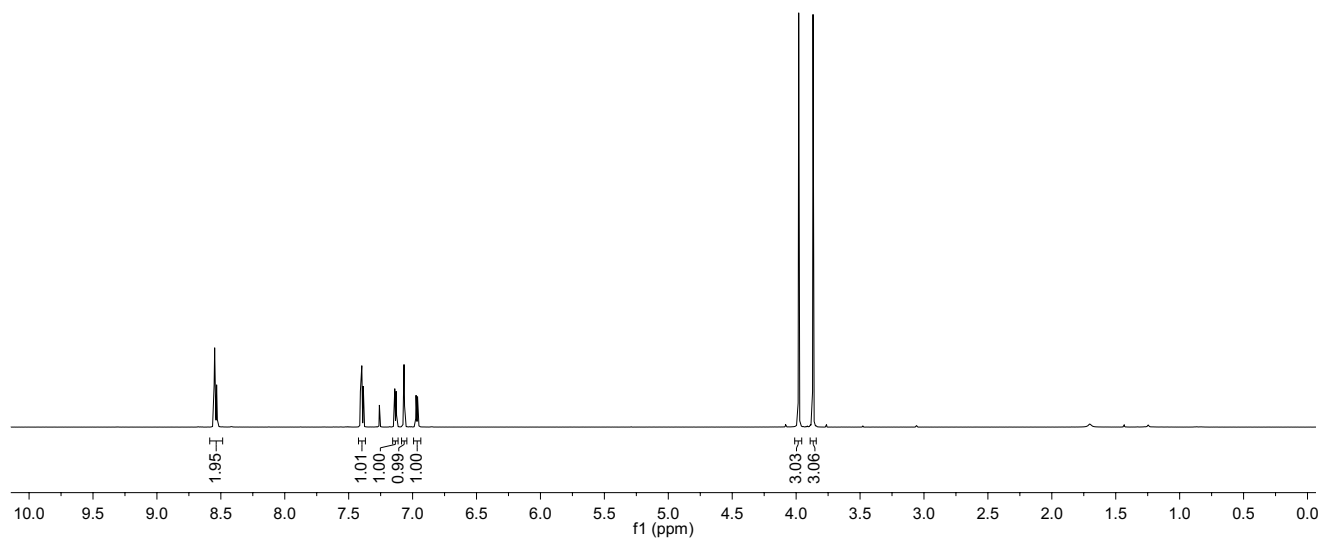

<sup>13</sup>C NMR (176 MHz, CDCl<sub>3</sub>) - **S14**

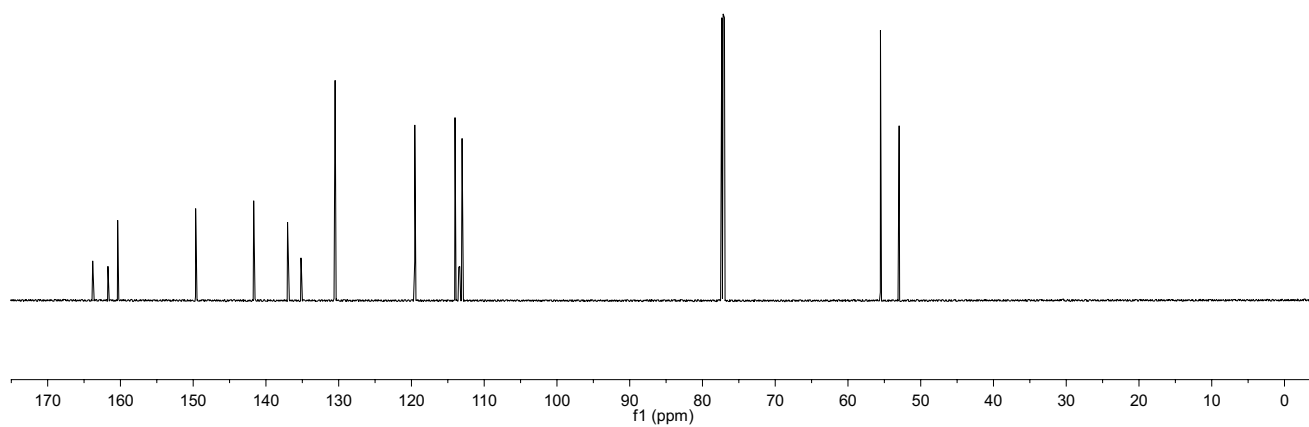



$^{19}\text{F}$  NMR (376 MHz,  $\text{CDCl}_3$ ) - **S14**

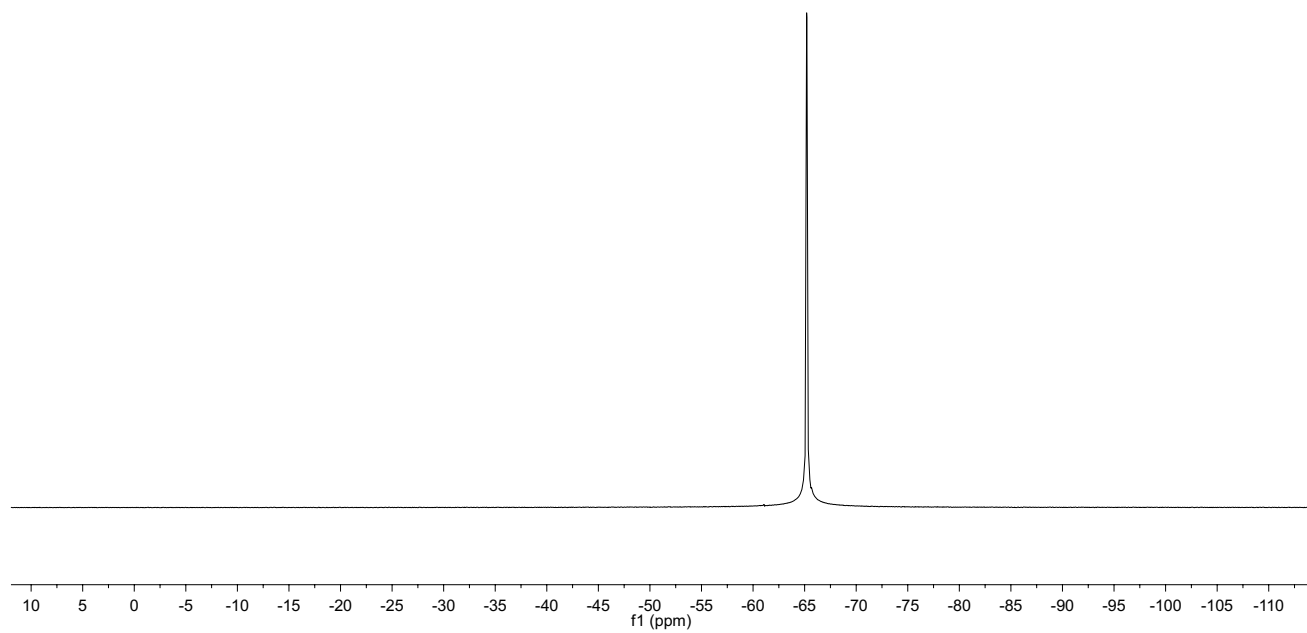

$^1\text{H}$  NMR (700 MHz,  $\text{CDCl}_3$ ) - **S15**

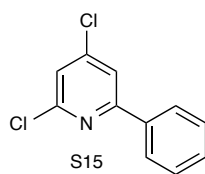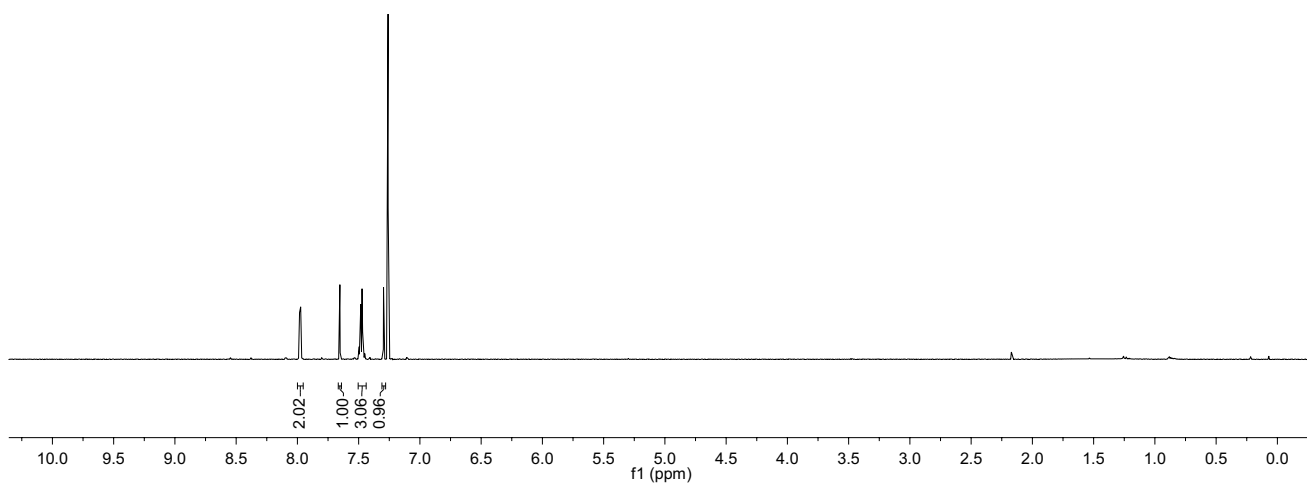

<sup>13</sup>C NMR (176 MHz, CDCl<sub>3</sub>) - **S15**

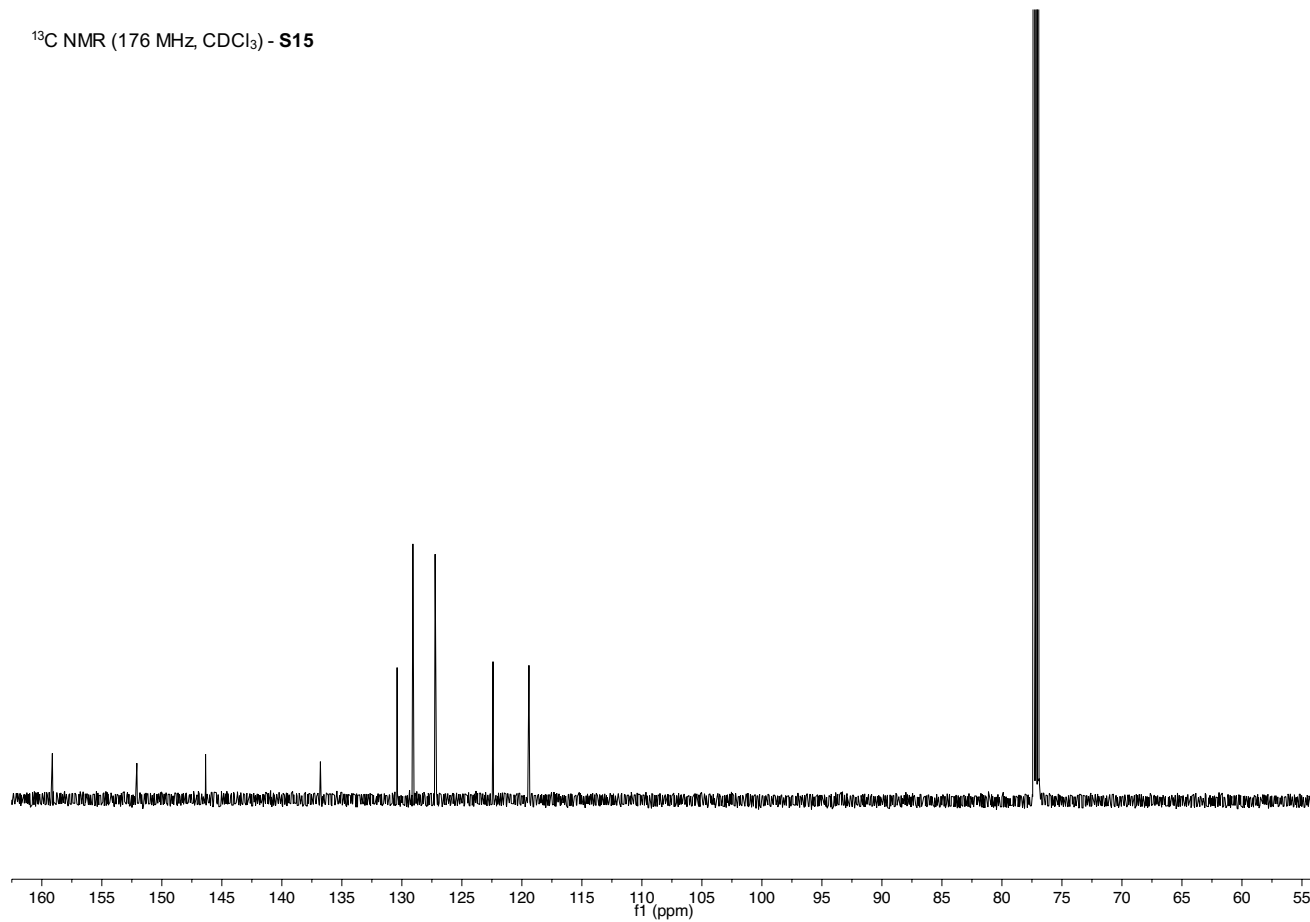

<sup>1</sup>H NMR (700 MHz, CDCl<sub>3</sub>) - **S16**

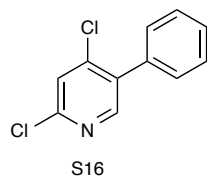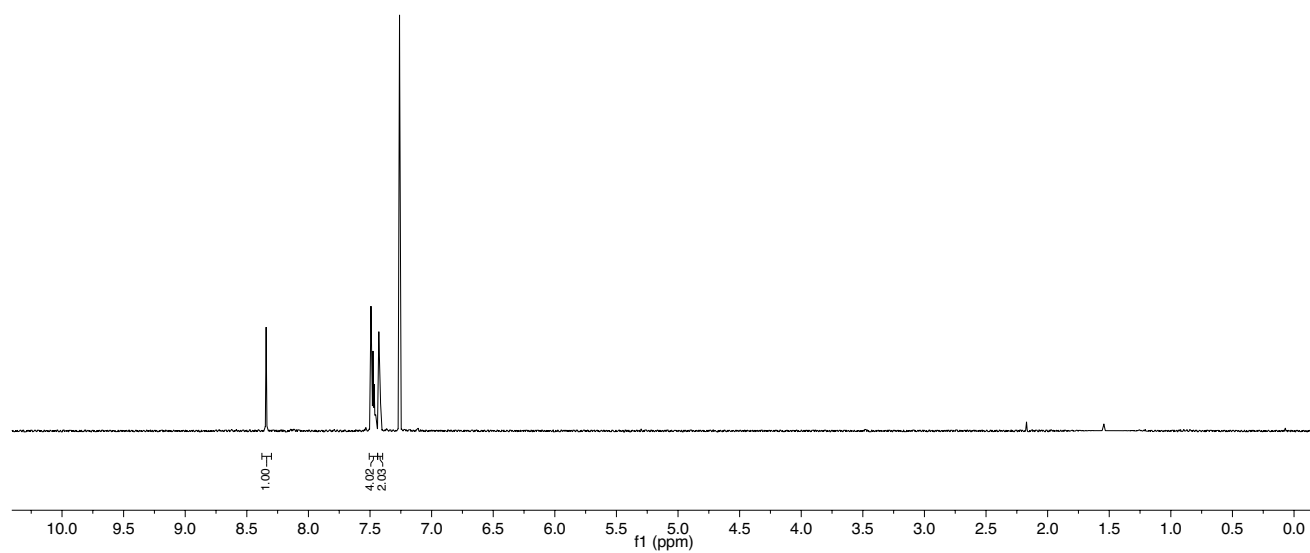

$^{13}\text{C}$  NMR (176 MHz,  $\text{CDCl}_3$ ) - **S16**

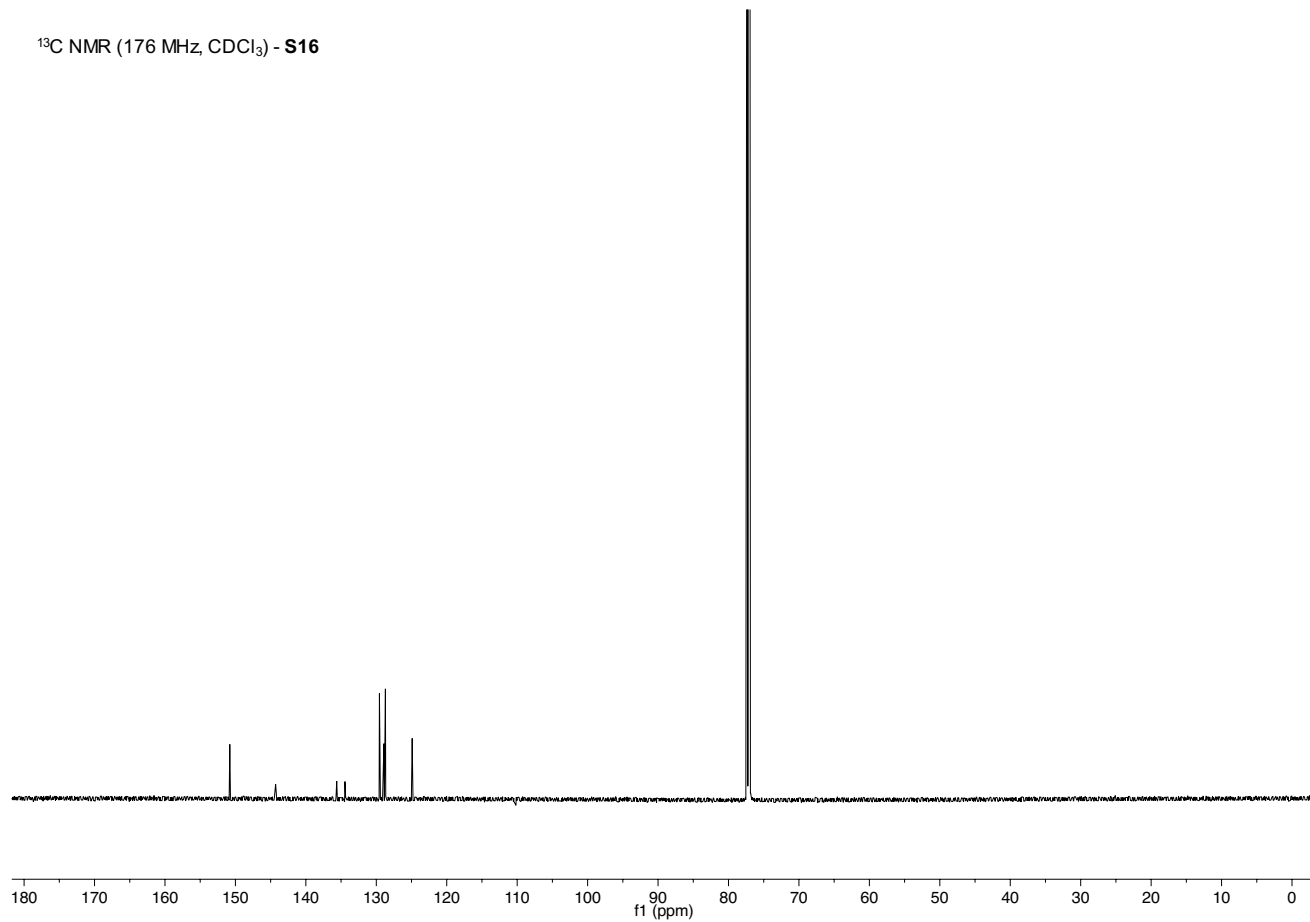

$^1\text{H}$  NMR (700 MHz,  $\text{CDCl}_3$ ) - **S17**

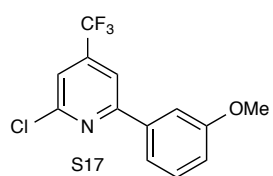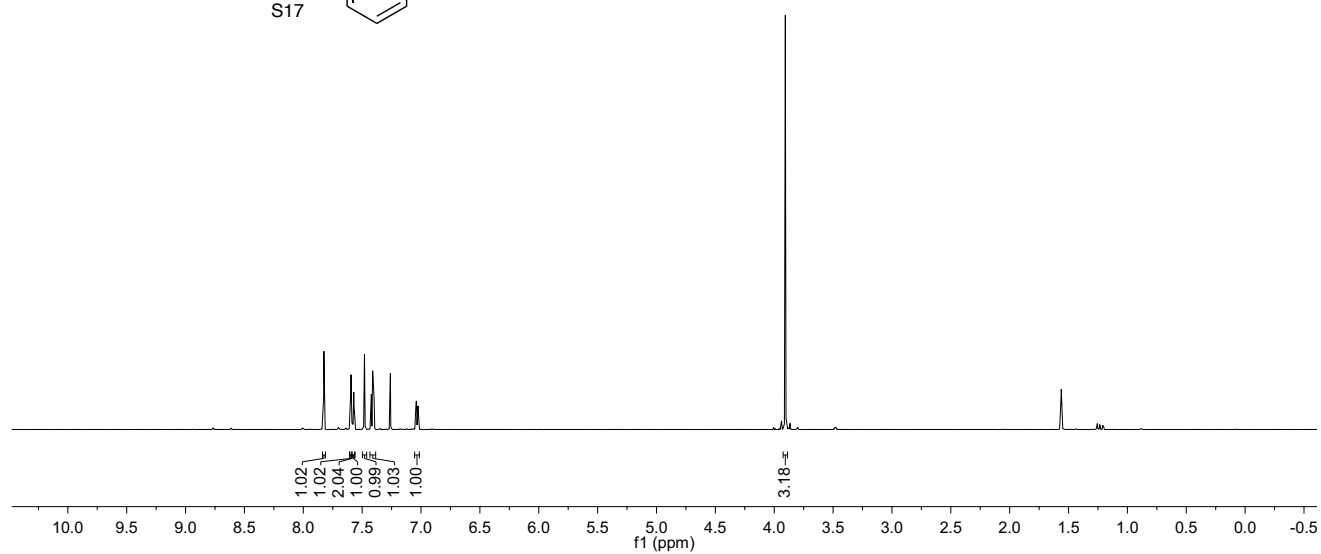

$^{13}\text{C}$  NMR (176 MHz,  $\text{CDCl}_3$ ) - **S17**

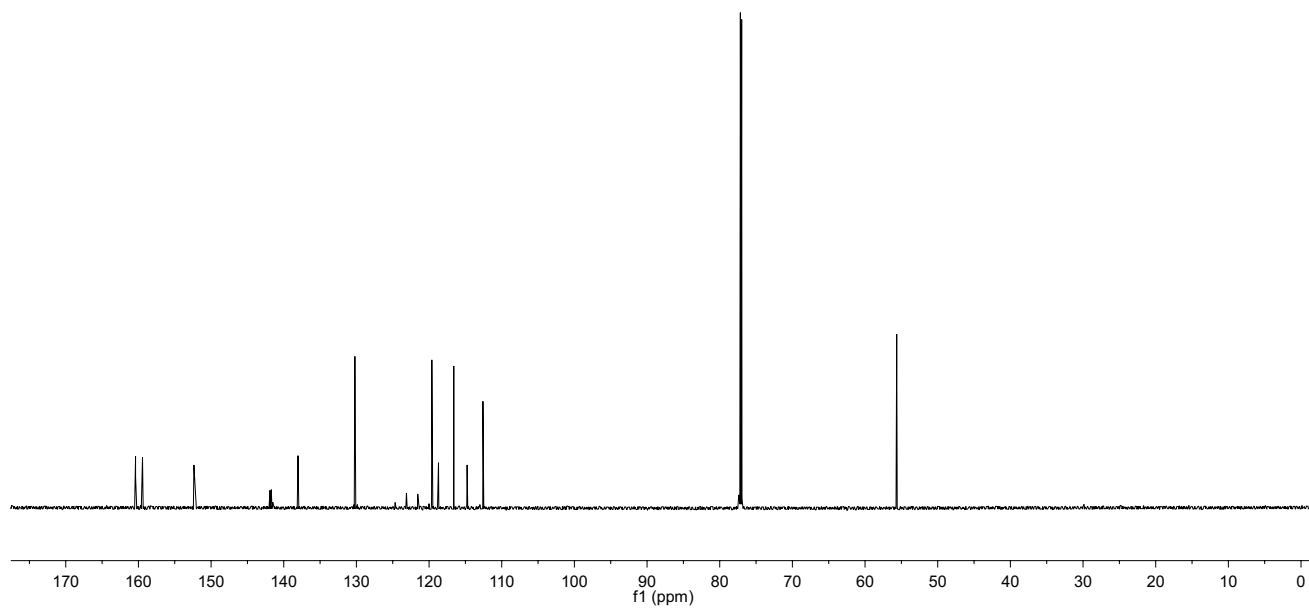

$^{19}\text{F}$  NMR (376 MHz,  $\text{CDCl}_3$ ) - **S17**

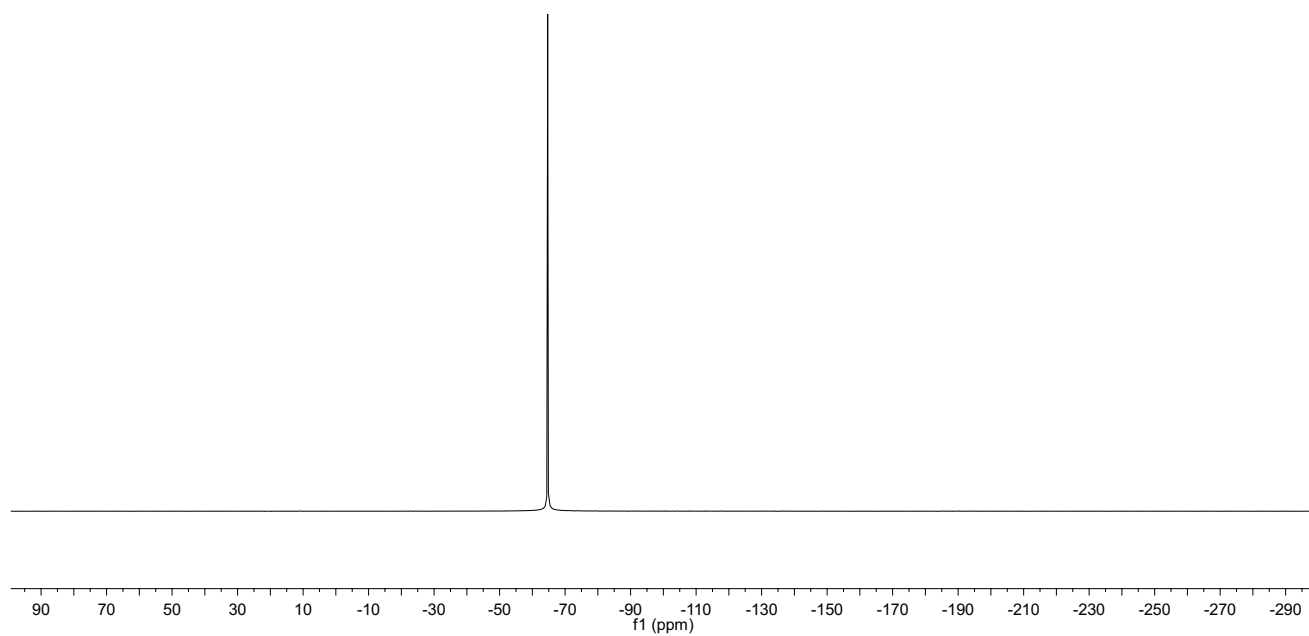

<sup>1</sup>H NMR (700 MHz, CDCl<sub>3</sub>) - **S18**

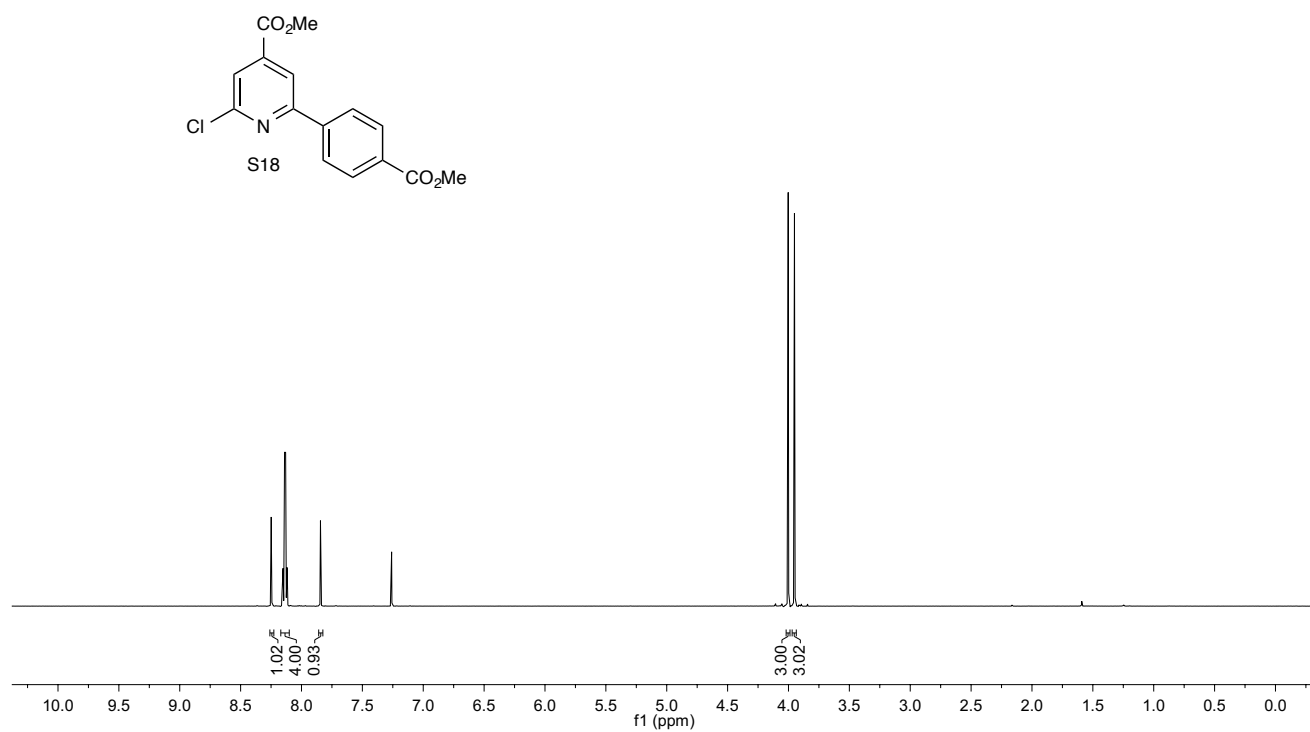

<sup>13</sup>C NMR (176 MHz, CDCl<sub>3</sub>) - **S18**

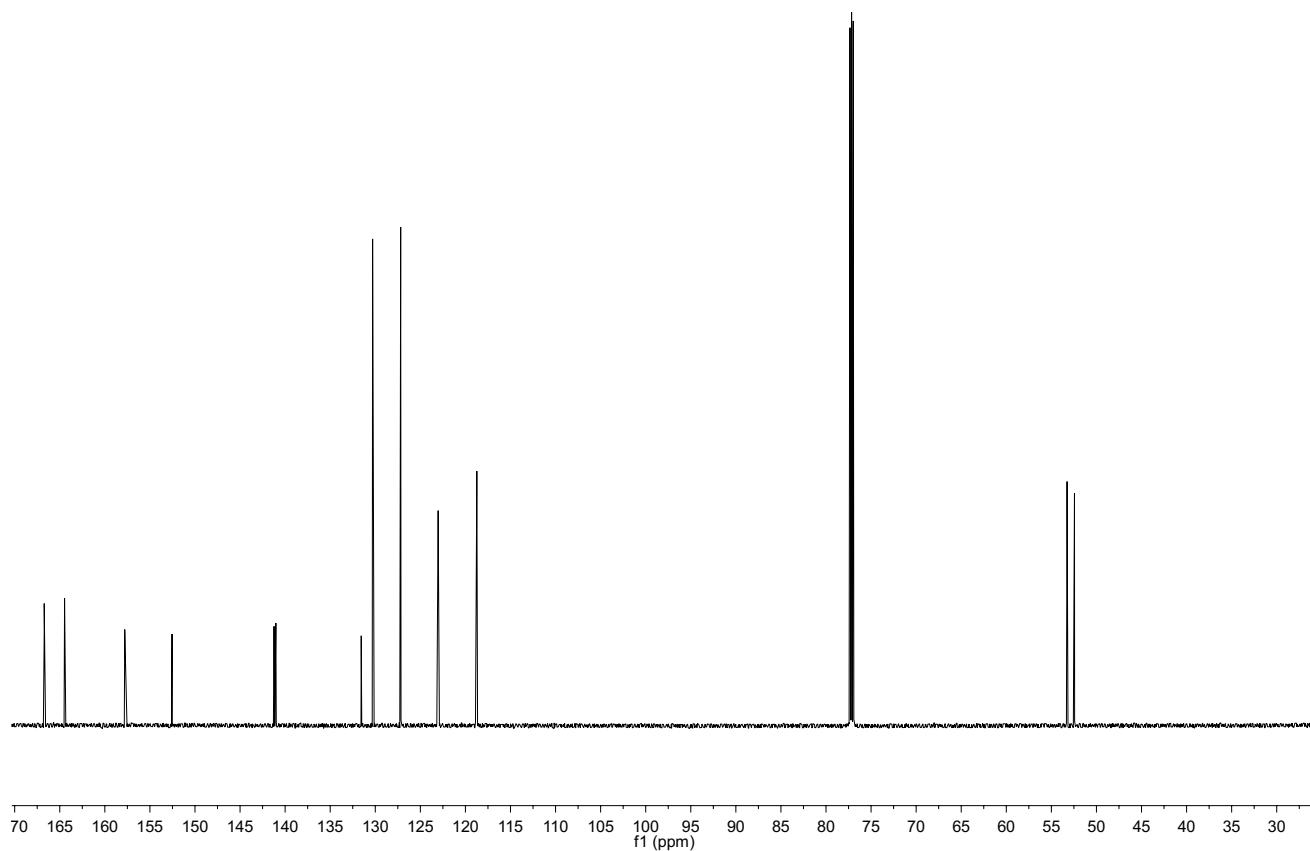

<sup>1</sup>H NMR (700 MHz, CDCl<sub>3</sub>) - **S19**

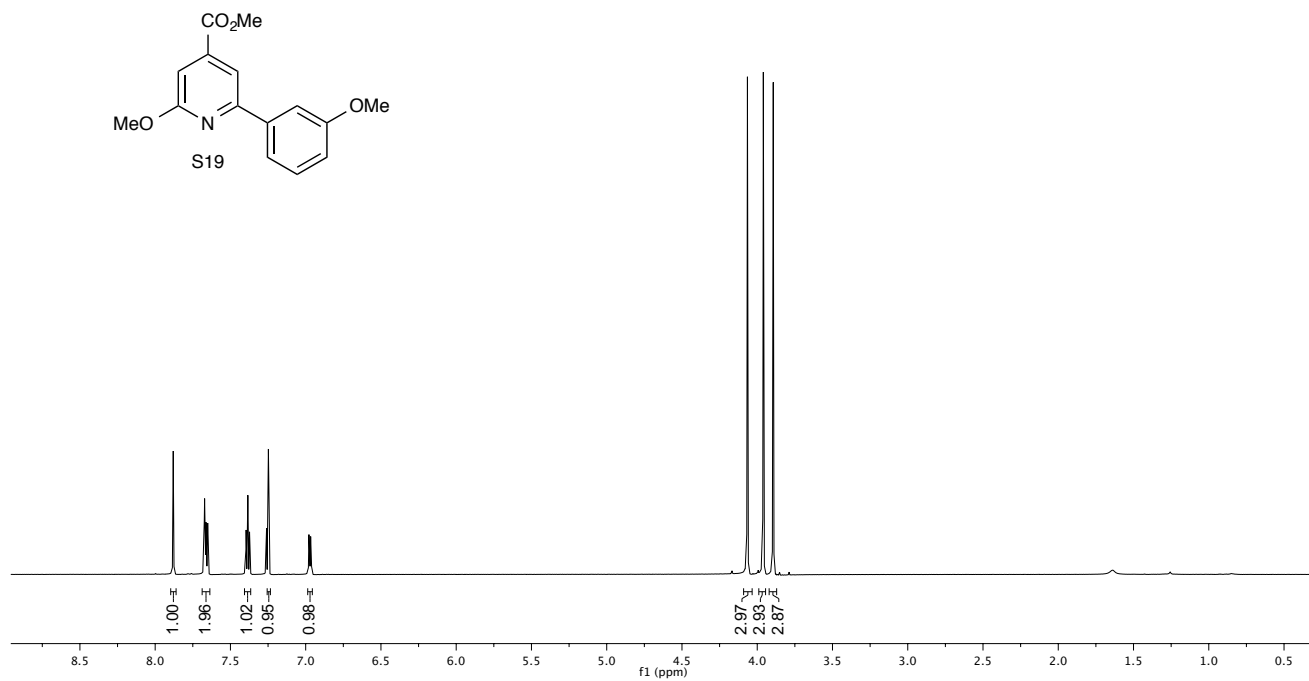

<sup>13</sup>C NMR (176 MHz, CDCl<sub>3</sub>) - **S19**

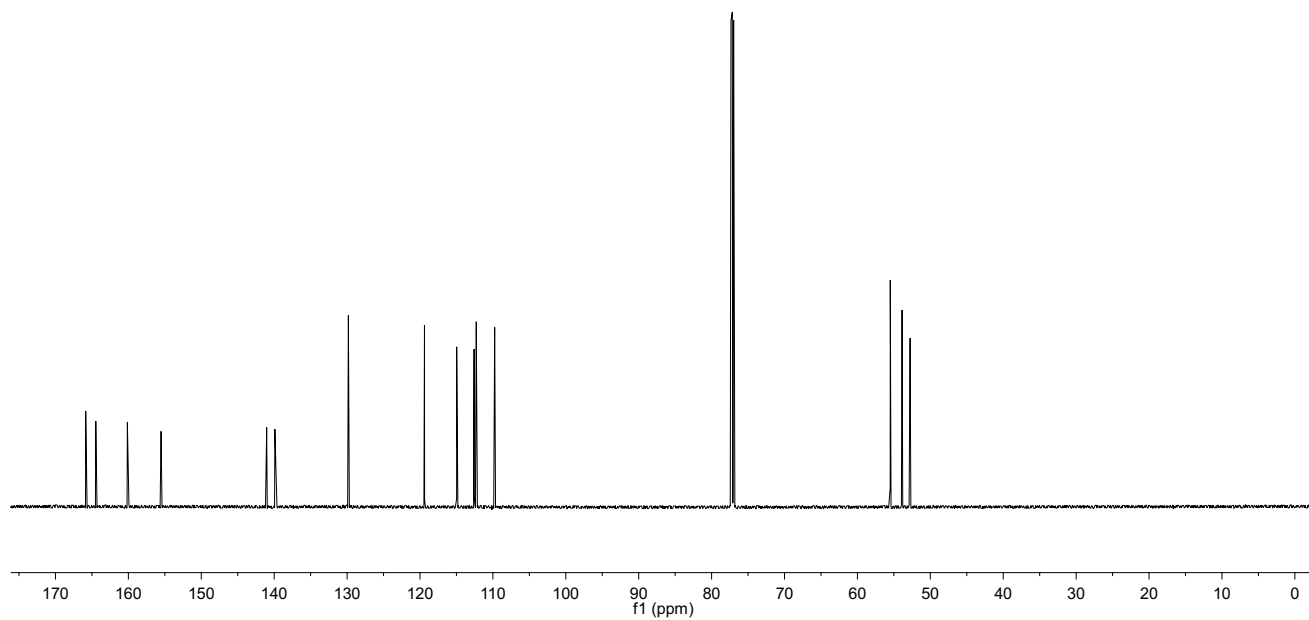

<sup>1</sup>H NMR (600 MHz, CDCl<sub>3</sub>) - **S20**

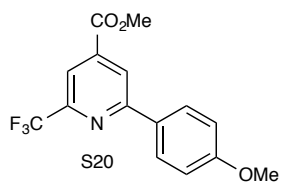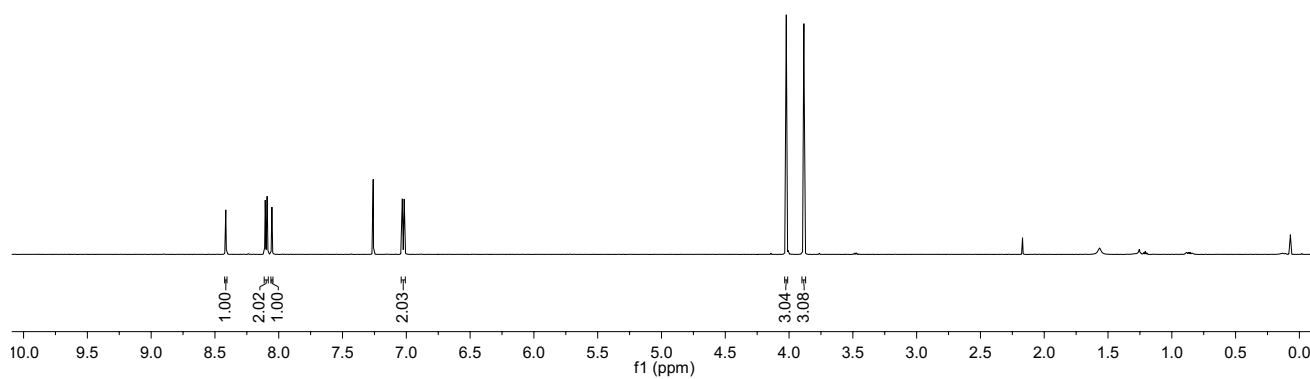

<sup>13</sup>C NMR (151 MHz, CDCl<sub>3</sub>) - **S20**

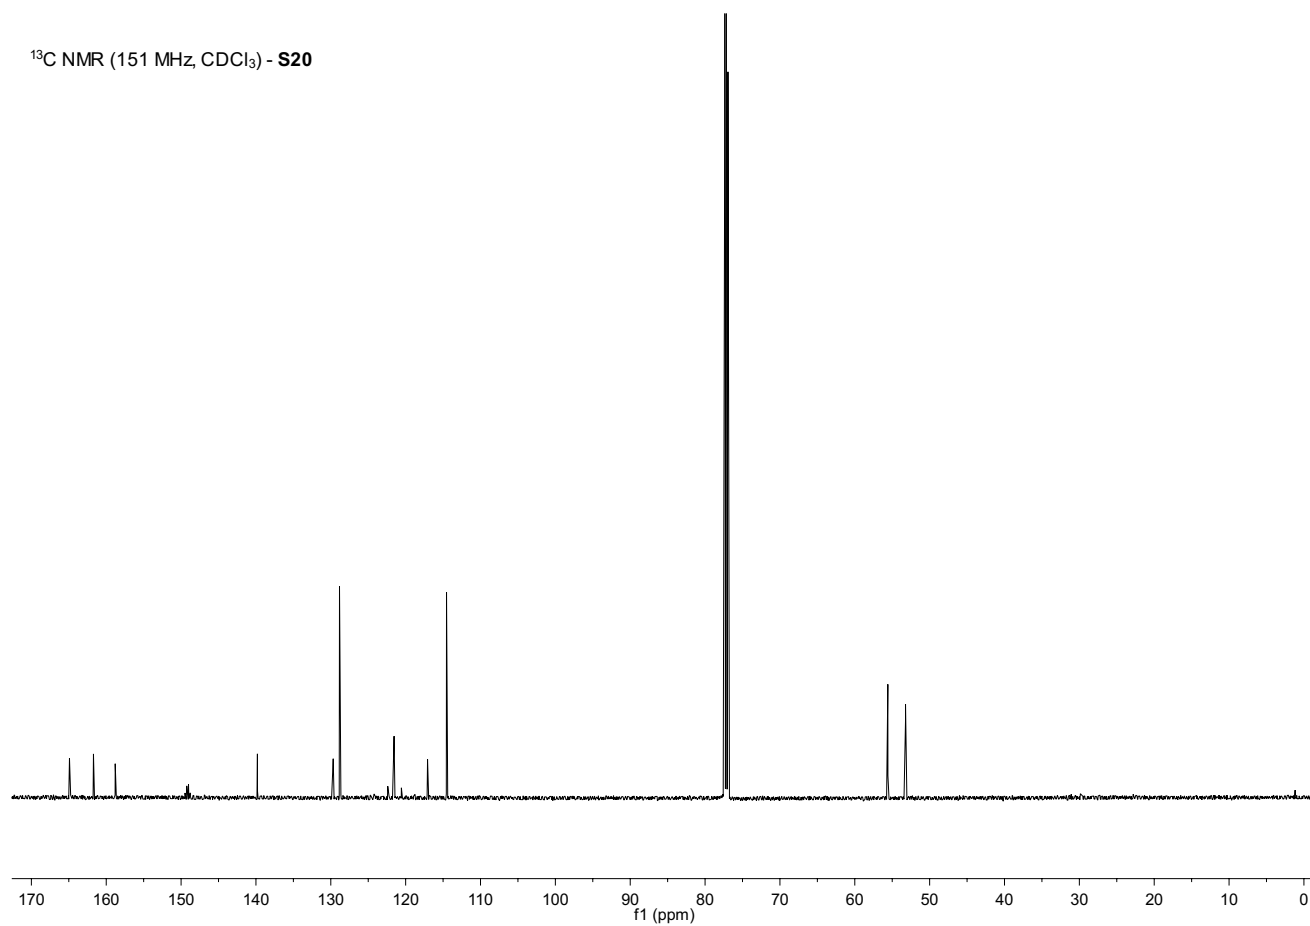

$^{19}\text{F}$  NMR (376 MHz,  $\text{CDCl}_3$ ) - **S20**

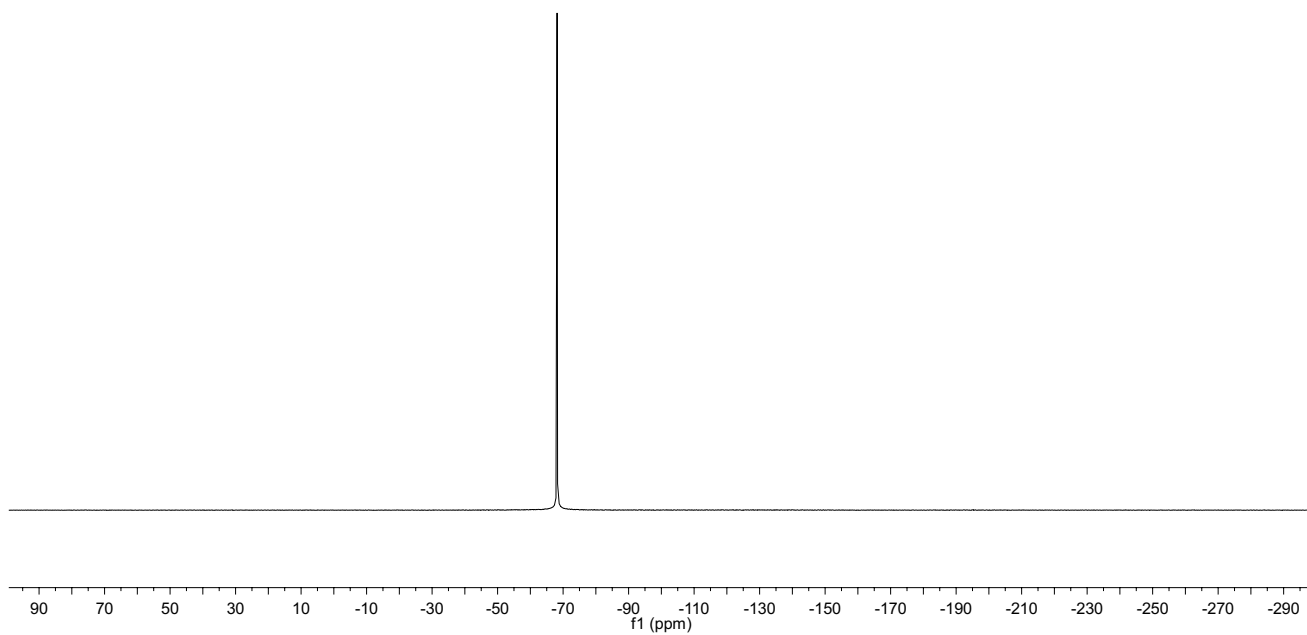

$^1\text{H}$  NMR (700 MHz,  $\text{CDCl}_3$ ) - **S21**

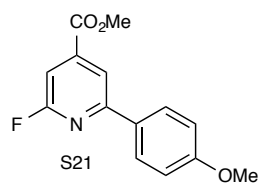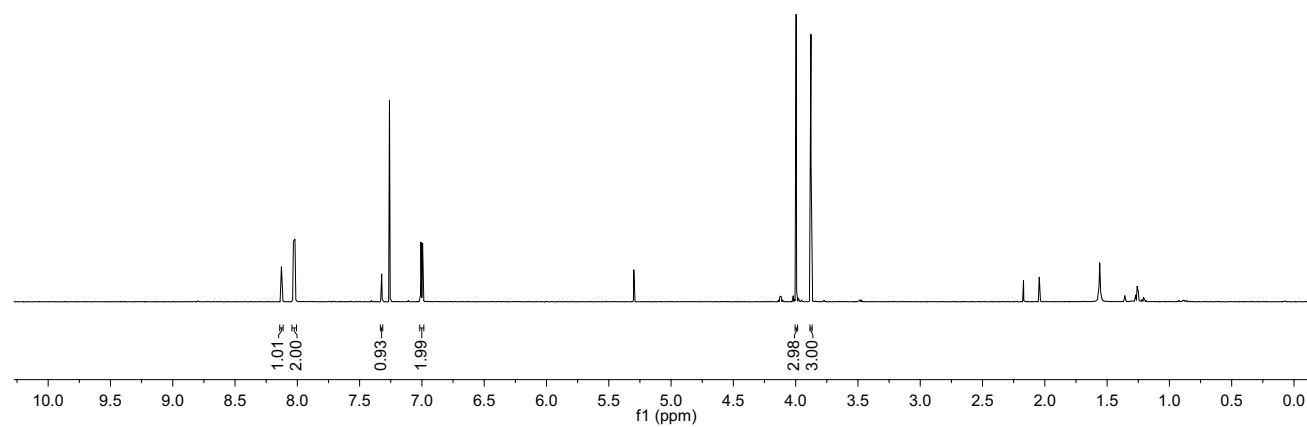



$^{13}\text{C}$  NMR (176 MHz,  $\text{CDCl}_3$ ) - **S21**

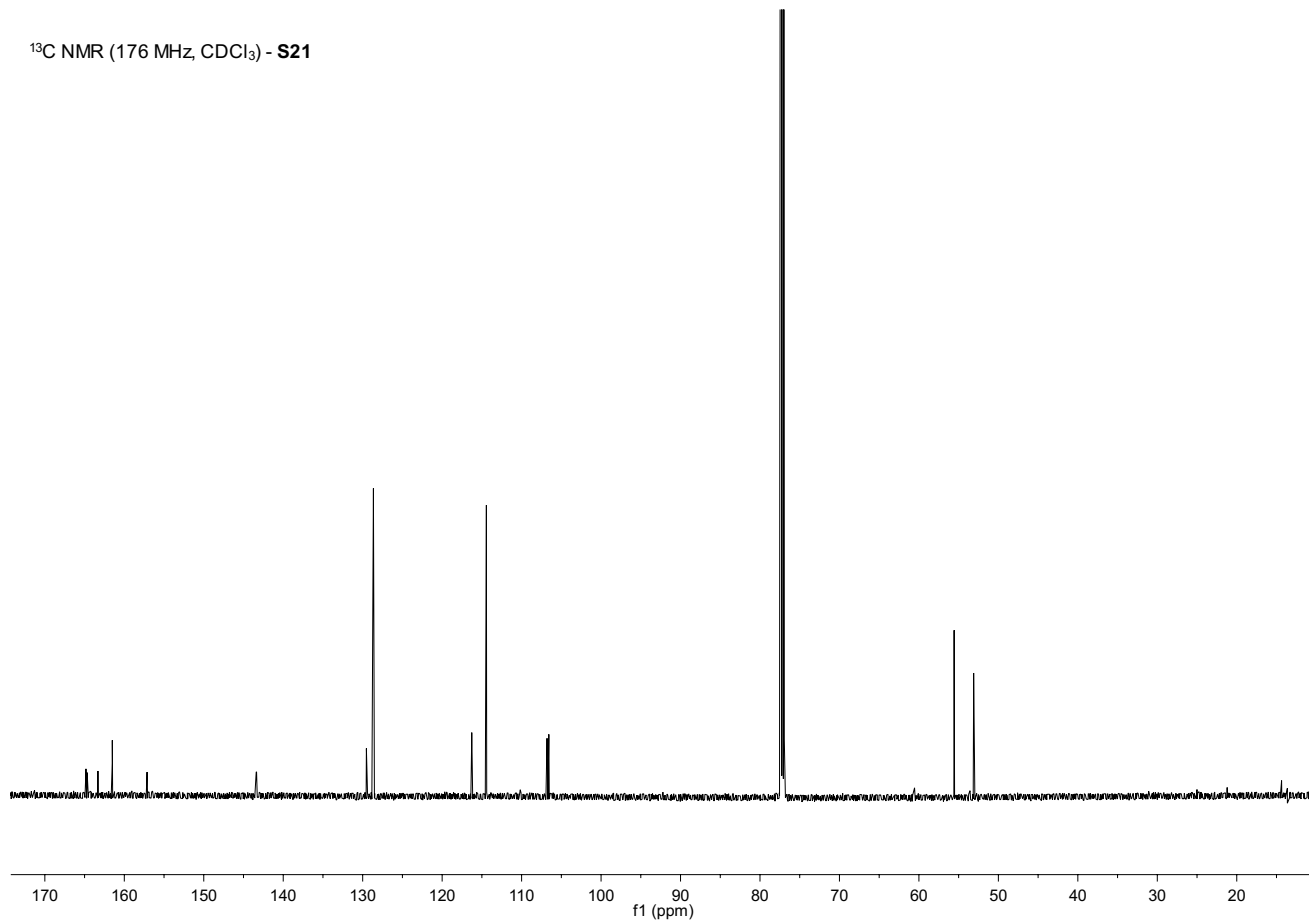

$^{19}\text{F}$  NMR (376 MHz,  $\text{CDCl}_3$ ) - **S21**

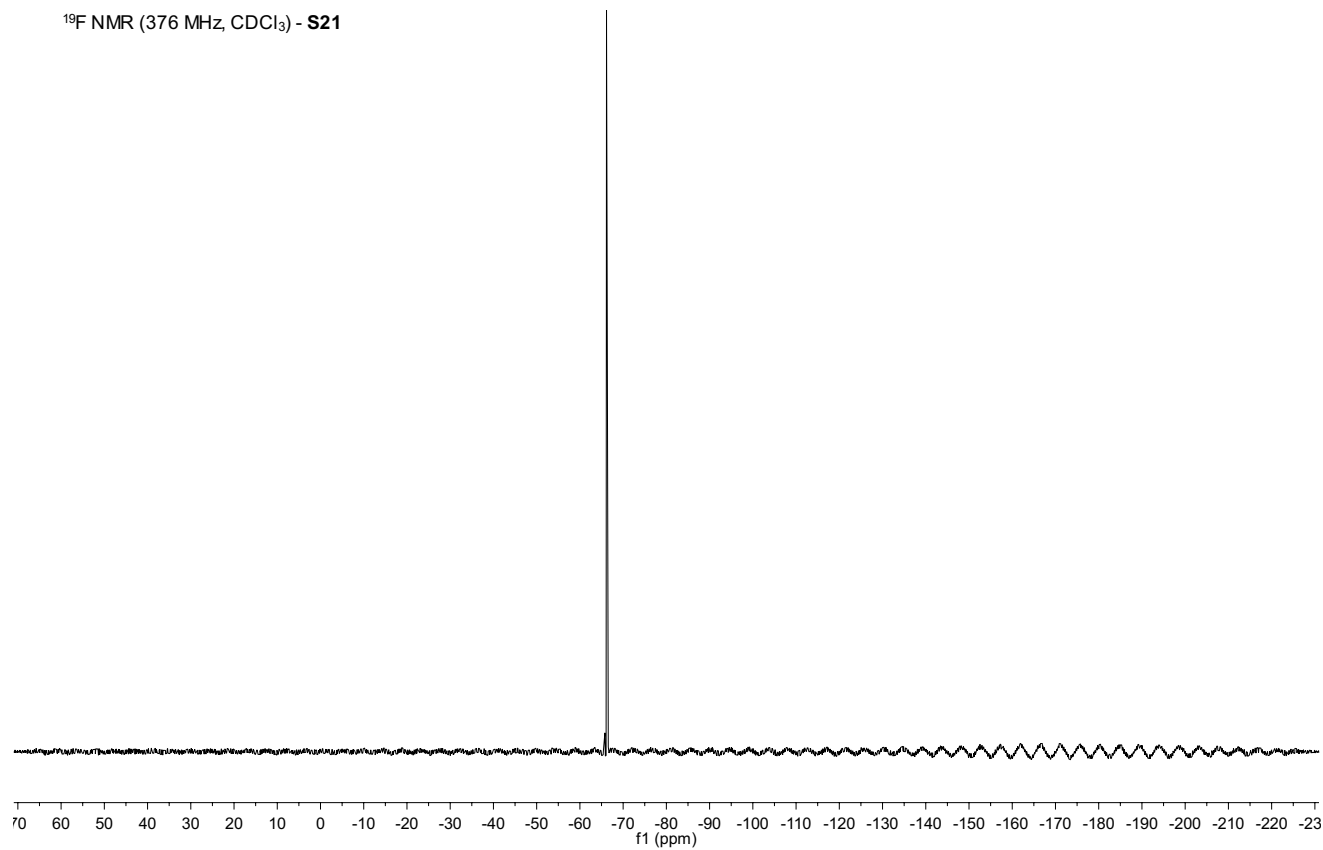

<sup>1</sup>H NMR (700 MHz, CDCl<sub>3</sub>) - **S22**

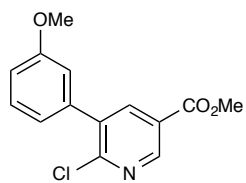

**S22**

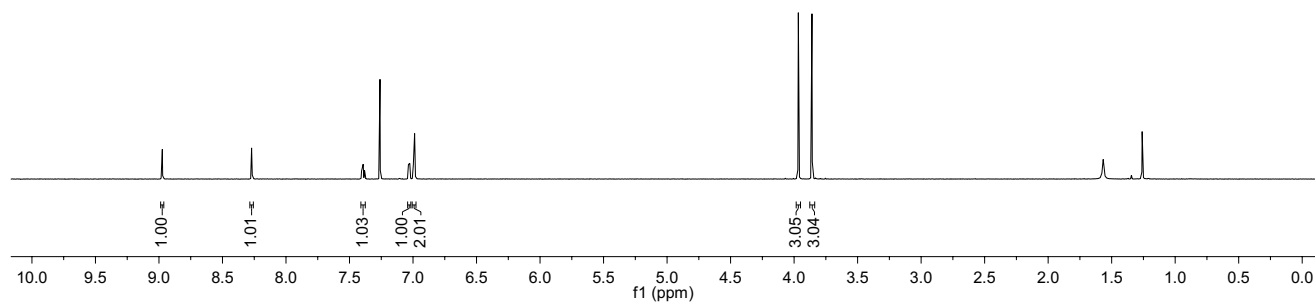

<sup>13</sup>C NMR (176 MHz, CDCl<sub>3</sub>) - **S22**

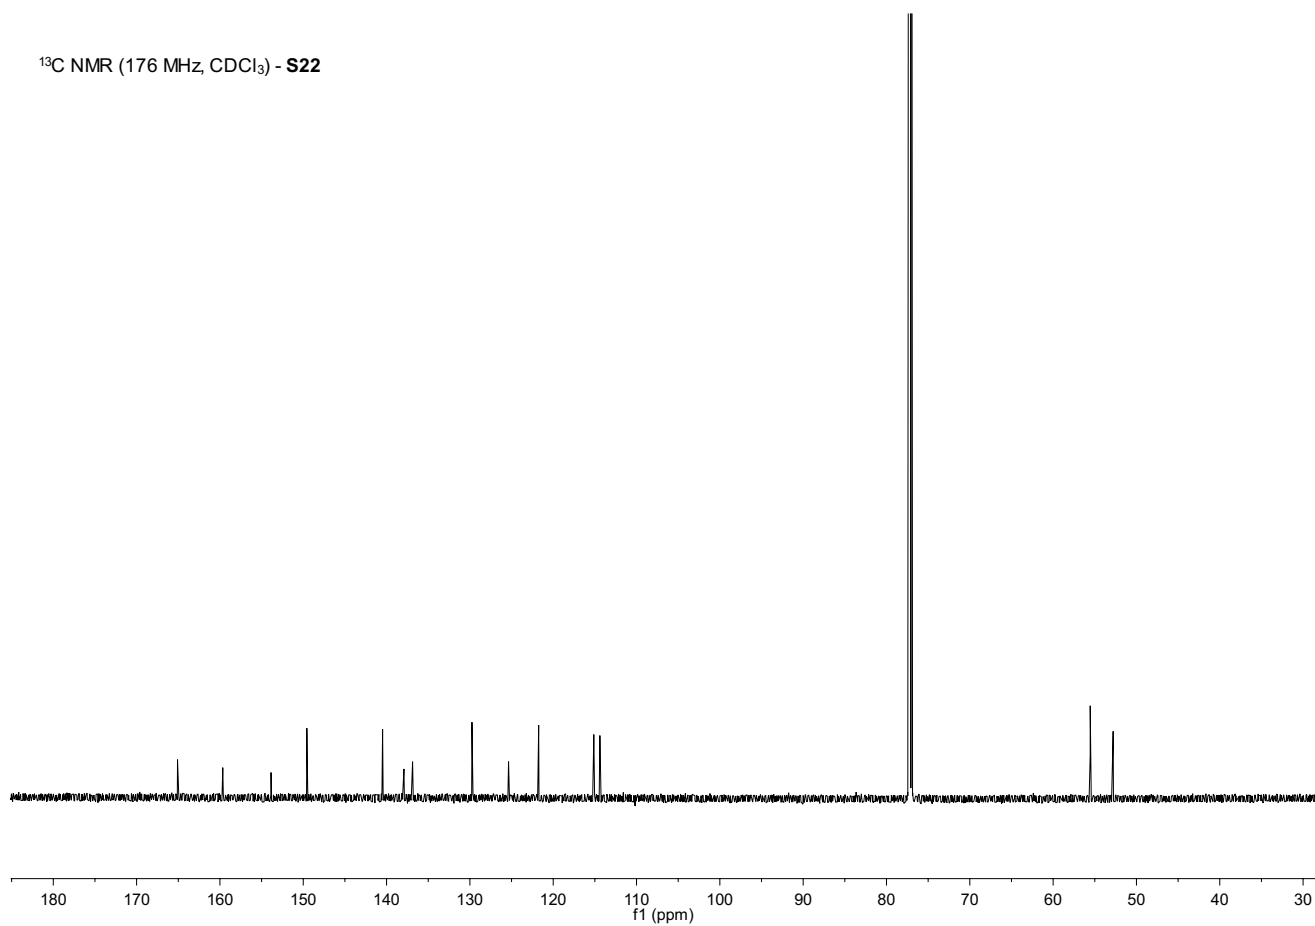

### X-Ray Crystallography

The X-ray data were collected on Bruker 3-circle diffractometers with CCD area detectors ProteumM APEX (**5**), SMART 6000 (**39e**, **S4**, **S1**) and SMART 1000 (**S6**, **S7**), using graphite-monochromated Mo-K $\alpha$  radiation ( $\lambda = 0.71073$  Å) from a sealed tube or (for **5**) a 60W Mo-target microfocus Bede Microsource X-ray generator with glass polycapillary X-ray optics. Crystals were cooled using Cryostream (Oxford Cryosystems) open flow N<sub>2</sub> cryostats. Reflection intensities were integrated using SAINT program.<sup>3</sup> The structures were solved by direct methods and refined by full matrix least squares (non-H atoms anisotropic, H atoms in riding model) against  $F^2$  of all data, using OLEX2<sup>4</sup> and SHELXTL software<sup>5</sup> Crystal data and other experimental details are listed in Table X1, molecular structures are shown in Figs X1–X4. Molecule **5** lies on a crystallographic mirror ( $m$ ) plane, which passes through B and O atoms, the pyridine ring and two adjacent methyl carbons. The C<sub>2</sub>Me<sub>4</sub> moiety is disordered between two positions related via this plane and corresponding to two oppositely twisted conformations of the Bpin ring. Structure **S3** contains two symmetrically independent molecules of similar conformation. The absolute polarity of structure **S6** could not be established.

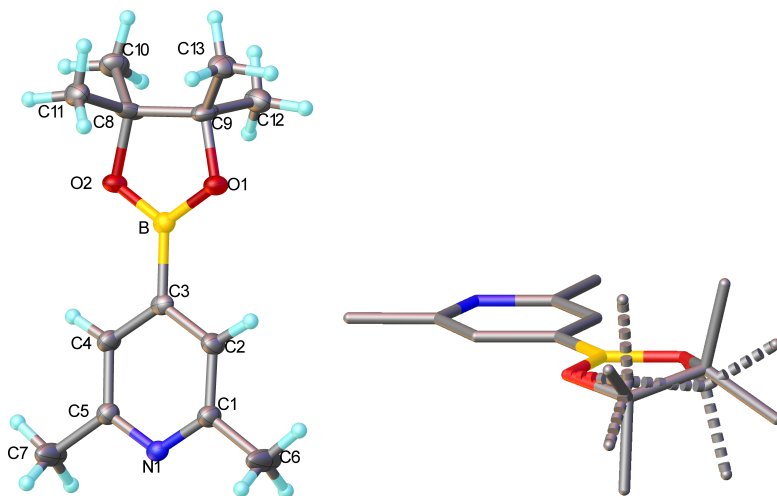

<sup>3</sup> SAINT version 6.45, Bruker AXS, Madison, WI, 2001

<sup>4</sup> Dolomanov, O.V., Bourhis, L.J., Gildea, R.J, Howard, J.A.K. & Puschmann, H. (2009), J. Appl. Cryst. 42, 339-341.

<sup>5</sup> Sheldrick, G.M. (2008). Acta Cryst. A64, 112-122

Fig. X1. Molecular structure of **5** in the crystal: Unique conformation (left) and disorder (right). Here and below thermal ellipsoids are drawn at 50% probability level.

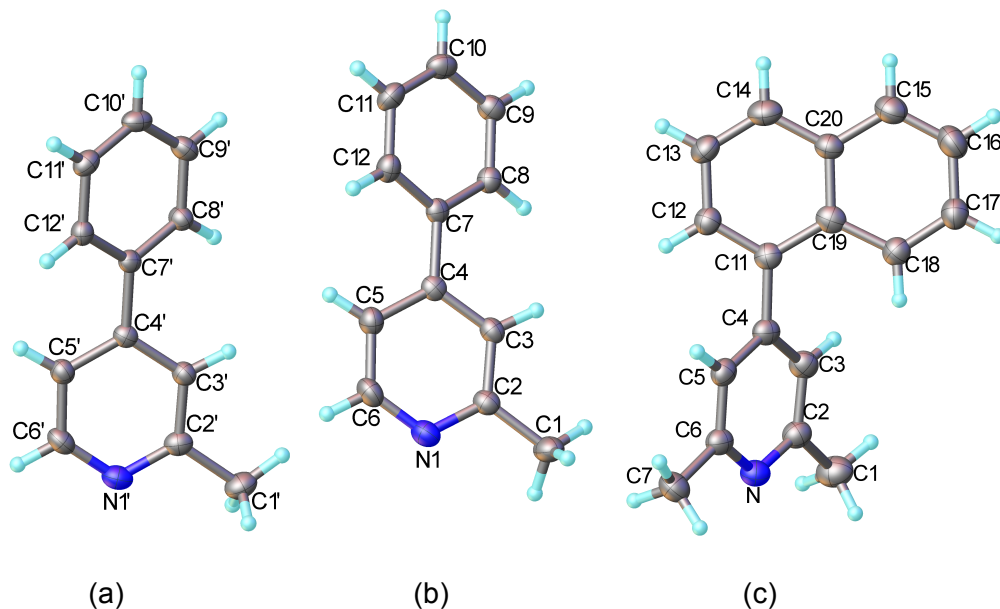

Fig. X2. Two independent molecules of **S4** (a, b) and molecule of **S1** (c) in the crystal. Angles between arene and pyridine planes: 24.7° (a), 28.7° (b) and 51.2° (c).

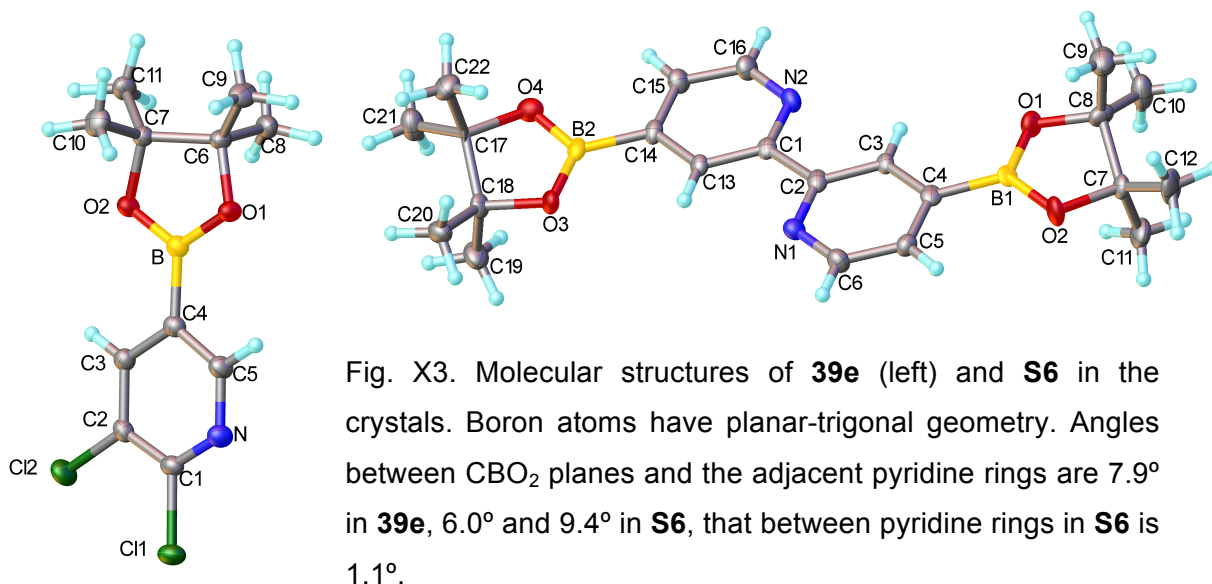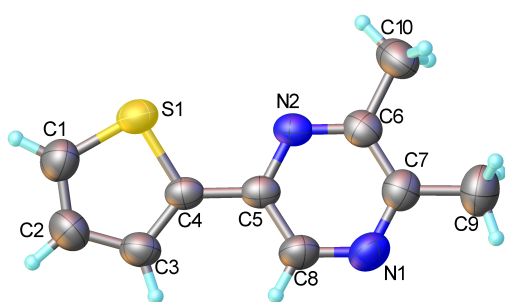

Fig. X4. Molecular structure of **S7** in the crystal. The heterocycles form an interplanar angle of 10.3°.

Table X1. Crystal data

| Compound                     | 5                                                              | 39e                                                              | S4                                | S1                                | S6                                                                           | S7                                               |
|------------------------------|----------------------------------------------------------------|------------------------------------------------------------------|-----------------------------------|-----------------------------------|------------------------------------------------------------------------------|--------------------------------------------------|
| CCDC                         | 988600                                                         | 988601                                                           | 988602                            | 988603                            | 988604                                                                       | 988605                                           |
| Formula                      | C <sub>13</sub> H <sub>20</sub> BN <sub>2</sub> O <sub>2</sub> | C <sub>11</sub> H <sub>14</sub> BCl <sub>2</sub> NO <sub>2</sub> | C <sub>12</sub> H <sub>11</sub> N | C <sub>17</sub> H <sub>15</sub> N | C <sub>22</sub> H <sub>30</sub> B <sub>2</sub> N <sub>2</sub> O <sub>4</sub> | C <sub>10</sub> H <sub>10</sub> N <sub>2</sub> S |
| $D_{calc.}/\text{g cm}^{-3}$ | 1.157                                                          | 1.385                                                            | 1.224                             | 1.222                             | 1.231                                                                        | 1.293                                            |
| Formula weight               | 233.11                                                         | 273.94                                                           | 169.22                            | 233.30                            | 408.10                                                                       | 190.26                                           |
| $T/\text{K}$                 | 120                                                            | 120                                                              | 120                               | 120                               | 120                                                                          | 250                                              |
| Crystal system               | monoclinic                                                     | monoclinic                                                       | orthorhombic                      | monoclinic                        | orthorhombic                                                                 | monoclinic                                       |
| Space group                  | P2 <sub>1</sub> /m (#11)                                       | P2 <sub>1</sub> /n (#14)                                         | Pbca (#61)                        | P2 <sub>1</sub> /c (#14)          | Pna2 <sub>1</sub> (#33)                                                      | P2 <sub>1</sub> /c (#14)                         |
| $a/\text{\AA}$               | 7.9952(15)                                                     | 6.5381(4)                                                        | 7.4760(6)                         | 11.2252(16)                       | 20.849(4)                                                                    | 7.1352(19)                                       |
| $b/\text{\AA}$               | 6.8431(13)                                                     | 21.3579(12)                                                      | 20.8897(14)                       | 15.438(2)                         | 6.6532(12)                                                                   | 12.292(3)                                        |
| $c/\text{\AA}$               | 12.251(2)                                                      | 9.4192(5)                                                        | 23.5283(17)                       | 7.6917(12)                        | 15.874(3)                                                                    | 11.175(3)                                        |
| $\beta/^\circ$               | 93.085(4)                                                      | 93.137(2)                                                        | 90                                | 107.874(4)                        | 90                                                                           | 94.168(4)                                        |
| $V/\text{\AA}^3$             | 669.3(2)                                                       | 1313.33(13)                                                      | 3674.4(5)                         | 1268.6(3)                         | 2201.9(7)                                                                    | 977.5(4)                                         |
| $Z$                          | 2                                                              | 4                                                                | 16                                | 4                                 | 4                                                                            | 4                                                |
| $2\theta_{max}/^\circ$       | 53                                                             | 61                                                               | 55                                | 50.5                              | 50                                                                           | 50                                               |
| Measured refls.              | 3959                                                           | 18635                                                            | 30673                             | 11358                             | 10891                                                                        | 7011                                             |
| Unique refls.                | 1496                                                           | 4008                                                             | 4220                              | 2236                              | 3720                                                                         | 1720                                             |
| Refls with $I > 2\sigma(I)$  | 1310                                                           | 3283                                                             | 2868                              | 1286                              | 2515                                                                         | 1411                                             |
| $R_{int}$                    | 0.020                                                          | 0.028                                                            | 0.060                             | 0.088                             | 0.080                                                                        | 0.024                                            |
| Parameters                   | 121                                                            | 162                                                              | 239                               | 167                               | 287                                                                          | 122                                              |
| Dr max/min, $e/\text{\AA}^3$ | 0.29, -0.25                                                    | 0.36, -0.17                                                      | 0.29, -0.19                       | 0.21, -0.19                       | 0.58, -0.25                                                                  | 0.16, -0.20                                      |
| $wR_2$ (all data)            | 0.143                                                          | 0.083                                                            | 0.107                             | 0.122                             | 0.172                                                                        | 0.108                                            |
| $R_1 [I > 2\sigma(I)]$       | 0.055                                                          | 0.031                                                            | 0.039                             | 0.045                             | 0.069                                                                        | 0.037                                            |
